# Supplementary material for: A Genome-Wide Longitudinal Transcriptome Analysis of the Aging Model Podospora anserine
Source: PLoS One. 2013 Dec 20;8(12):e83109. doi: 10.1371/journal.pone.0083109 (PMC3869774; doi:10.1371/journal.pone.0083109)
Supplement: Table S2 — GO term annotation library of P. anserine. (XLS) [file pone.0083109.s002.xls]

## Sheet: Legend
Supporting Table S2: GO term annotation library of P. anserina. The table compiles all genes and their annotated GO identification numbers resulted from BLAST homology comparison (see description in text). Only genes with at least one assigned GO term are listed.

## Sheet: GO annotations
Gene id	GO ids
Pa_0_10	GO:0016884, GO:0016740
Pa_0_1000	GO:0005737, GO:0003934, GO:0006730, GO:0046654, GO:0005525, GO:0046872, GO:0046656, GO:0016787, GO:0005829, GO:0005634, GO:0050660, GO:0004631, GO:0008762, GO:0006695, GO:0009116
Pa_0_1010	GO:0005634, GO:0003677, GO:0006367, GO:0003743, GO:0051287, GO:0016616, GO:0016747
Pa_0_1020	GO:0005622, GO:0008270
Pa_0_1030	GO:0005840, GO:0003735, GO:0006412, GO:0004864, GO:0043666, GO:0009966
Pa_0_1050	GO:0005840, GO:0003735, GO:0006412, GO:0004864, GO:0043666, GO:0009966
Pa_0_1060	GO:0005634, GO:0008270, GO:0016021, GO:0022891, GO:0008643, GO:0003700, GO:0022857, GO:0000023
Pa_0_1070	GO:0005634, GO:0008270, GO:0003700, GO:0008080
Pa_0_1080	GO:0005737, GO:0050113, GO:0005506, GO:0019310, GO:0042493
Pa_0_1090	GO:0016787, GO:0051287, GO:0016616, GO:0008442, GO:0050662, GO:0004616, GO:0006098, GO:0006573
Pa_0_110	GO:0016787, GO:0004104, GO:0004091, GO:0080030, GO:0080032, GO:0080031, GO:0003990, GO:0005488, GO:0004806, GO:0004771, GO:0047739, GO:0004371, GO:0006071, GO:0016042
Pa_0_1100	GO:0016787, GO:0051920
Pa_0_1110	GO:0005737, GO:0005634, GO:0016616, GO:0008270, GO:0016491, GO:0004222, GO:0006508, GO:0004022, GO:0048037, GO:0006067, GO:0006116, GO:0005759, GO:0005625, GO:0001950, GO:0019170, GO:0043458, GO:0009986, GO:0005576, GO:0030446, GO:0005886, GO:0030445, GO:0005515, GO:0042710, GO:0006096, GO:0044416, GO:0008926
Pa_0_1120	GO:0051920, GO:0047575
Pa_0_1130	GO:0016787, GO:0051920
Pa_0_1140	GO:0016787, GO:0051287, GO:0016616, GO:0008442, GO:0050662, GO:0004616, GO:0006098, GO:0006573
Pa_0_1170	GO:0016787, GO:0005829, GO:0005634, GO:0005524, GO:0004835, GO:0006464, GO:0018166, GO:0000226, GO:0006260, GO:0000932
Pa_0_1190	GO:0005622, GO:0008270, GO:0003824, GO:0030170, GO:0008483, GO:0008168, GO:0030151, GO:0008152, GO:0016829, GO:0006777
Pa_0_120	GO:0008270, GO:0016021, GO:0016491, GO:0004497, GO:0003676, GO:0018658, GO:0055085, GO:0008892, GO:0009055, GO:0020037, GO:0016705
Pa_0_1200	GO:0031429, GO:0009982, GO:0030515, GO:0042254, GO:0031120
Pa_0_1210	GO:0005829, GO:0005634, GO:0005515, GO:0006777, GO:0030131, GO:0006886, GO:0016192, GO:0016757, GO:0030121, GO:0032153, GO:0051286, GO:0005905, GO:0005768, GO:0005816, GO:0030276, GO:0016197, GO:0071775, GO:0060237, GO:0032889, GO:0006896, GO:0030447, GO:0030132, GO:0030122, GO:0030665
Pa_0_1250	GO:0016787, GO:0005576, GO:0030248, GO:0004553, GO:0030245, GO:0016162, GO:0008810
Pa_0_1260	GO:0003824
Pa_0_1270	GO:0005634, GO:0003677, GO:0016021, GO:0005524, GO:0055085, GO:0004518, GO:0006281, GO:0042626
Pa_0_1290	GO:0005622, GO:0008270
Pa_0_1300	GO:0005829, GO:0005634, GO:0006777, GO:0030131, GO:0006886, GO:0016192, GO:0016757, GO:0030121, GO:0032153, GO:0051286, GO:0005905, GO:0005768, GO:0005816, GO:0030276, GO:0016197, GO:0071775, GO:0060237, GO:0032889, GO:0006896, GO:0030447, GO:0030132, GO:0030122, GO:0030665
Pa_0_1310	GO:0016740, GO:0009986, GO:0005576, GO:0030446, GO:0005886, GO:0030445, GO:0016757, GO:0004553, GO:0005975, GO:0005618, GO:0007047, GO:0031225, GO:0016020, GO:0009277, GO:0000131, GO:0006037, GO:0031505, GO:0042972, GO:0008061, GO:0046658
Pa_0_1320	GO:0016787, GO:0016021, GO:0005524, GO:0003824, GO:0055085, GO:0005975, GO:0043169
Pa_0_1330	GO:0005737, GO:0046872, GO:0005634, GO:0005622, GO:0016021, GO:0006508, GO:0004177, GO:0030145, GO:0008237, GO:0009987, GO:0008235, GO:0016805, GO:0003950, GO:0006471, GO:0005739, GO:0034982, GO:0007005, GO:0031314, GO:0050821, GO:0016779, GO:0003723, GO:0006396
Pa_0_1340	GO:0019901, GO:0000079, GO:0016301
Pa_0_1350	GO:0005524, GO:0003824, GO:0016829, GO:0000287, GO:0030976, GO:0005529, GO:0000155, GO:0018106, GO:0003984
Pa_0_1360	GO:0004553, GO:0005975, GO:0046556, GO:0046373, GO:0045493
Pa_0_1370	GO:0005576, GO:0030248, GO:0046556, GO:0046373, GO:0045493, GO:0045490
Pa_0_1380	GO:0005488, GO:0016020, GO:0033961, GO:0004301, GO:0009636, GO:0016746
Pa_0_1390	GO:0004177, GO:0030145, GO:0009987, GO:0004180, GO:0003796, GO:0016998, GO:0009253
Pa_0_140	GO:0005634, GO:0003677, GO:0008270, GO:0003700
Pa_0_1400	GO:0006508, GO:0005576, GO:0016020, GO:0004177, GO:0008237, GO:0008233, GO:0004872, GO:0000324, GO:0007039, GO:0005509, GO:0004571, GO:0009405
Pa_0_1420	GO:0008168
Pa_0_1430	GO:0005737, GO:0008270, GO:0016811, GO:0070403, GO:0006342, GO:0006476
Pa_0_1440	GO:0046872, GO:0016021, GO:0006508, GO:0004177, GO:0008237, GO:0004180, GO:0008233, GO:0004872, GO:0007218, GO:0006623, GO:0003755, GO:0006457, GO:0005783, GO:0071627, GO:0043328
Pa_0_1460	GO:0016787, GO:0004553, GO:0005975, GO:0033943, GO:0030246
Pa_0_1480	GO:0016740, GO:0046872, GO:0005829, GO:0005634, GO:0005622, GO:0006886, GO:0006623, GO:0043328, GO:0010008, GO:0033565, GO:0005794, GO:0031321, GO:0033554, GO:0006900, GO:0043130, GO:0045324
Pa_0_150	GO:0016787, GO:0005634, GO:0009116, GO:0008270, GO:0016021, GO:0003700, GO:0016491, GO:0006508, GO:0005524, GO:0003824, GO:0004497, GO:0009055, GO:0020037, GO:0016705, GO:0006886, GO:0004553, GO:0006281, GO:0005975, GO:0003723, GO:0016301, GO:0004190, GO:0003964, GO:0006278, GO:0003908, GO:0015171, GO:0004674, GO:0018024, GO:0031227, GO:0016788, GO:0006505, GO:0006629
Pa_0_1500	GO:0005737, GO:0005829, GO:0016020, GO:0006914, GO:0015031, GO:0005730, GO:0030437, GO:0006995, GO:0000747, GO:0032258, GO:0016236, GO:0007126
Pa_0_1510	GO:0005737, GO:0016491, GO:0017000
Pa_0_1530	GO:0003824, GO:0004553, GO:0008810, GO:0005975, GO:0043169
Pa_0_1540	GO:0003677, GO:0008270, GO:0005840, GO:0008168, GO:0004497, GO:0003676, GO:0009055, GO:0020037, GO:0016705, GO:0070330
Pa_0_1550	GO:0008270, GO:0003676, GO:0016192, GO:0015031, GO:0004308, GO:0005643, GO:0017056, GO:0046907, GO:0006810, GO:0005789, GO:0012507
Pa_0_1560	GO:0005622, GO:0005089, GO:0035023
Pa_0_1580	GO:0005840, GO:0003735, GO:0006412, GO:0003723, GO:0015935, GO:0022627, GO:0000049, GO:0002181, GO:0000462
Pa_0_160	GO:0016021, GO:0004497, GO:0009055, GO:0020037, GO:0016705, GO:0016020, GO:0070330, GO:0005789, GO:0016712, GO:0047646, GO:0018685, GO:0019825, GO:0010430, GO:0048252
Pa_0_1600	GO:0005737, GO:0016021, GO:0005506, GO:0016491, GO:0005886, GO:0016702, GO:0008336, GO:0045329, GO:0008495, GO:0048034, GO:0031418, GO:0050353
Pa_0_1630	GO:0016491
Pa_0_170	GO:0005525, GO:0016491, GO:0005874, GO:0007017, GO:0051258
Pa_0_180	GO:0005634, GO:0008270, GO:0003700
Pa_0_190	GO:0050660, GO:0003677, GO:0005576, GO:0006281, GO:0008812, GO:0006066, GO:0046562, GO:0016614, GO:0047682, GO:0000166, GO:0033718
Pa_0_200	GO:0016740, GO:0016021, GO:0005886, GO:0005524, GO:0003824, GO:0055085, GO:0009055, GO:0020037, GO:0016705, GO:0006281, GO:0006629, GO:0005215, GO:0030870, GO:0004435, GO:0035556
Pa_0_210	GO:0005737, GO:0005634, GO:0003677, GO:0008270, GO:0003700, GO:0016491, GO:0000166, GO:0004319, GO:0051903, GO:0008106, GO:0046688
Pa_0_220	GO:0005840, GO:0004497, GO:0009055, GO:0020037, GO:0016705
Pa_0_240	GO:0016740, GO:0016747, GO:0008270, GO:0005488, GO:0016491, GO:0006508, GO:0048037, GO:0003824, GO:0008168, GO:0020037, GO:0016746, GO:0000036, GO:0031177, GO:0009058, GO:0016874, GO:0050637, GO:0047462, GO:0006633, GO:0008757, GO:0030639, GO:0004197, GO:0047879
Pa_0_260	GO:0005737, GO:0005634
Pa_0_270	GO:0046872, GO:0016787, GO:0005576, GO:0030248, GO:0004553, GO:0030245, GO:0008810, GO:0005975, GO:0016798
Pa_0_280	GO:0046872, GO:0050660, GO:0016491, GO:0005576, GO:0003824, GO:0009055, GO:0030248, GO:0004553, GO:0030245, GO:0030246, GO:0008812, GO:0006066, GO:0016614, GO:0016052, GO:0047735, GO:0006355, GO:0007165, GO:0003779, GO:0051537
Pa_0_30	GO:0016021, GO:0003824, GO:0016874
Pa_0_300	GO:0005737, GO:0016616, GO:0000036, GO:0031177, GO:0016874, GO:0008677, GO:0050661, GO:0015940
Pa_0_310	GO:0005737, GO:0005524, GO:0004356, GO:0006807, GO:0006542, GO:0048315, GO:0030435
Pa_0_320	GO:0005488, GO:0005524, GO:0006915
Pa_0_330	GO:0006508, GO:0005794, GO:0004252
Pa_0_340	GO:0050660, GO:0003677, GO:0006508, GO:0006281, GO:0004190, GO:0008812, GO:0006066, GO:0046562, GO:0016614, GO:0047682, GO:0000166, GO:0033718, GO:0047639, GO:0005777, GO:0015945, GO:0050288
Pa_0_360	GO:0005739
Pa_0_370	GO:0046872, GO:0004601, GO:0016691
Pa_0_390	GO:0050660, GO:0008270, GO:0016491, GO:0004022, GO:0070403, GO:0005794, GO:0051903, GO:0008106, GO:0018467, GO:0003995, GO:0047895, GO:0046526, GO:0043295, GO:0042803, GO:0006069, GO:0046294, GO:0042867, GO:0042732
Pa_0_40	GO:0005634, GO:0003677, GO:0008270, GO:0016846, GO:0006351
Pa_0_400	GO:0005525, GO:0016787, GO:0050660, GO:0008270, GO:0005488, GO:0005524, GO:0003676, GO:0050661, GO:0006915, GO:0046930, GO:0015267, GO:0006812, GO:0052331, GO:0046931, GO:0004499, GO:0006952, GO:0005871, GO:0003777, GO:0042802, GO:0017111, GO:0004523
Pa_0_410	GO:0050660, GO:0008762, GO:0016021, GO:0005524, GO:0055085, GO:0016020, GO:0004674, GO:0016614, GO:0046873, GO:0016772, GO:0004672
Pa_0_420	GO:0016740, GO:0016021, GO:0008080, GO:0009103
Pa_0_440	GO:0050660, GO:0016829, GO:0009055, GO:0008812, GO:0006066, GO:0016614, GO:0047682
Pa_0_470	GO:0005737, GO:0005524, GO:0004812, GO:0006418
Pa_0_480	GO:0016021, GO:0055085
Pa_0_50	GO:0016021, GO:0006464, GO:0016020, GO:0005789, GO:0008474, GO:0005773, GO:0047874, GO:0002084, GO:0030148, GO:0007035
Pa_0_500	GO:0050660, GO:0008762, GO:0016021, GO:0005524, GO:0055085, GO:0004674, GO:0016614, GO:0004672
Pa_0_510	GO:0050660, GO:0008762, GO:0005576, GO:0030248, GO:0004553, GO:0005975, GO:0016798
Pa_0_540	GO:0050662, GO:0005488, GO:0003824, GO:0044237
Pa_0_560	GO:0016021, GO:0055085, GO:0005215
Pa_0_580	GO:0005634, GO:0008270, GO:0016021, GO:0003700, GO:0055085
Pa_0_600	GO:0016021, GO:0016491, GO:0009986, GO:0015171, GO:0015191, GO:0000102, GO:0042883
Pa_0_610	GO:0016787, GO:0050660, GO:0008762, GO:0016021, GO:0008168, GO:0000287, GO:0015171, GO:0030430, GO:0016887, GO:0019079
Pa_0_630	GO:0045735
Pa_0_640	GO:0005634, GO:0016021, GO:0008168, GO:0018024, GO:0006810, GO:0004519, GO:0006289, GO:0009411, GO:0016279, GO:0018026
Pa_0_650	GO:0016740, GO:0005634, GO:0006281, GO:0006351, GO:0032931, GO:0030702
Pa_0_660	GO:0006508, GO:0008237, GO:0003723, GO:0006396, GO:0004180, GO:0004525
Pa_0_680	GO:0004497, GO:0009055, GO:0020037, GO:0016705, GO:0070330, GO:0016702, GO:0010181, GO:0003958
Pa_0_690	GO:0003824, GO:0005992
Pa_0_70	GO:0003735, GO:0006412, GO:0003723, GO:0005730, GO:0015934, GO:0030490
Pa_0_700	GO:0003677, GO:0005524, GO:0008094, GO:0006259
Pa_0_710	GO:0005737, GO:0005829, GO:0005634, GO:0008270, GO:0005625, GO:0009986, GO:0030446, GO:0005886, GO:0005515, GO:0006096, GO:0044416, GO:0005975, GO:0005739, GO:0004332, GO:0006094, GO:0016832
Pa_0_715	GO:0016021, GO:0009279
Pa_0_720	GO:0005488
Pa_0_740	GO:0005488, GO:0016491
Pa_0_750	GO:0005524, GO:0004672
Pa_0_755	GO:0006508, GO:0004252
Pa_0_770	GO:0003676, GO:0000166, GO:0030529
Pa_0_780	GO:0050660, GO:0008762, GO:0005488, GO:0016491, GO:0018658, GO:0009055, GO:0004221, GO:0006511, GO:0008171
Pa_0_785	GO:0005488, GO:0016491
Pa_0_80	GO:0005737, GO:0005634, GO:0050660, GO:0008270, GO:0003700, GO:0030170, GO:0008168, GO:0004497, GO:0009055, GO:0020037, GO:0016705, GO:0006520, GO:0018664, GO:0045454
Pa_0_810	GO:0005634, GO:0004553, GO:0005975, GO:0043169, GO:0030246, GO:0005215, GO:0006355, GO:0030288
Pa_0_820	GO:0008080, GO:0005506, GO:0051536, GO:0016226
Pa_0_830	GO:0005525, GO:0005829, GO:0004872, GO:0005783, GO:0017111, GO:0048500, GO:0008312, GO:0006614, GO:0005786, GO:0003924, GO:0005096, GO:0005048, GO:0006617, GO:0005785, GO:0005047
Pa_0_840	GO:0016787, GO:0005634, GO:0009116, GO:0006260, GO:0030131, GO:0006886, GO:0016192, GO:0005975, GO:0016020, GO:0030145, GO:0000287, GO:0005509, GO:0004571, GO:0006457, GO:0004588, GO:0006221, GO:0004559, GO:0044431, GO:0031072, GO:0051082, GO:0060205
Pa_0_850	GO:0005576, GO:0003824, GO:0030248, GO:0004553, GO:0030246, GO:0016052
Pa_0_860	GO:0005737, GO:0050660, GO:0003677, GO:0005622, GO:0008270, GO:0016021, GO:0016491, GO:0005515, GO:0005524, GO:0006260, GO:0003676, GO:0006281, GO:0006629, GO:0005730, GO:0045454, GO:0008026, GO:0006310, GO:0043140, GO:0043596, GO:0031422, GO:0006268, GO:0000724, GO:0031573, GO:0045950, GO:0007131, GO:0030071, GO:0034065, GO:0071140, GO:0000723, GO:0009650, GO:0030448, GO:0001302, GO:0031292, GO:…
Pa_0_870	GO:0016021, GO:0005524, GO:0055085, GO:0042626
Pa_0_880	GO:0016787, GO:0003824, GO:0047584, GO:0050150
Pa_0_90	GO:0005975, GO:0008061, GO:0016998, GO:0016798, GO:0016810
Pa_0_900	GO:0016787, GO:0006508, GO:0008236
Pa_0_910	GO:0005576, GO:0030248, GO:0004553, GO:0005975
Pa_0_930	GO:0005634, GO:0003677, GO:0008270, GO:0003700, GO:0003950, GO:0006471, GO:0006351
Pa_0_940	GO:0005634, GO:0003677, GO:0005622, GO:0008270, GO:0003700, GO:0006508, GO:0004177, GO:0030145, GO:0008235, GO:0003950, GO:0006471
Pa_0_950	GO:0005737, GO:0016787, GO:0005829, GO:0005634, GO:0003677, GO:0005622, GO:0008270, GO:0016021, GO:0003700, GO:0050662, GO:0005488, GO:0016491, GO:0003824, GO:0030170, GO:0008168, GO:0003676, GO:0055085, GO:0030447, GO:0033554, GO:0006810, GO:0016772, GO:0044237, GO:0006520, GO:0003854, GO:0006694, GO:0016853, GO:0016831, GO:0043892, GO:0045551, GO:0046568, GO:0008204, GO:0004090, GO:0034599, GO:…
Pa_0_960	GO:0005634, GO:0003677, GO:0005488, GO:0005739, GO:0004519, GO:0006289, GO:0009411, GO:0006298, GO:0043504, GO:0070914
Pa_0_980	GO:0016301
Pa_0_990	GO:0005737, GO:0005829, GO:0005634, GO:0005515, GO:0005524, GO:0016301, GO:0004798, GO:0006233, GO:0006235, GO:0009041, GO:0006227
Pa_1_100	GO:0009116, GO:0005488, GO:0005524, GO:0003824, GO:0006629, GO:0006915, GO:0006952, GO:0005871, GO:0003777, GO:0042802
Pa_1_1000	GO:0016021, GO:0005886, GO:0016829, GO:0032153, GO:0051286, GO:0005794, GO:0034599, GO:0006950, GO:0005743, GO:0008565, GO:0004012, GO:0045332
Pa_1_10000	GO:0006508, GO:0005576, GO:0009405, GO:0004190, GO:0060359, GO:0009268
Pa_1_10010	GO:0005622, GO:0008270, GO:0003676, GO:0006281, GO:0005635, GO:0016925, GO:0010224, GO:0010225
Pa_1_10030	GO:0005737, GO:0005829, GO:0005634, GO:0016491, GO:0033554, GO:0016614, GO:0016874, GO:0008171, GO:0050236, GO:0005216, GO:0042821
Pa_1_10040	GO:0009116, GO:0016021, GO:0005524, GO:0003824, GO:0042626
Pa_1_10050	GO:0005737, GO:0016787, GO:0005829, GO:0005634, GO:0003677, GO:0005622, GO:0008270, GO:0005515, GO:0005524, GO:0006281, GO:0003723, GO:0017111, GO:0004519, GO:0043596, GO:0004386, GO:0006284, GO:0033203, GO:0043141, GO:0006273, GO:0004003, GO:0000184, GO:0005844, GO:0003678, GO:0006449, GO:0004004, GO:0030466, GO:0008298, GO:0070478, GO:0016567, GO:0006415, GO:0016817, GO:0004609, GO:0008654
Pa_1_10070	GO:0005737, GO:0005829, GO:0006367, GO:0003743, GO:0008270, GO:0005515, GO:0008168, GO:0032153, GO:0008237, GO:0006355, GO:0005669, GO:0000991, GO:0003682, GO:0051123
Pa_1_10090	GO:0005488, GO:0035091, GO:0007154
Pa_1_1010	GO:0005576, GO:0030248, GO:0004553, GO:0005975, GO:0045493, GO:0031176
Pa_1_10100	GO:0005737, GO:0005829, GO:0016021, GO:0005524, GO:0032153, GO:0051286, GO:0016020, GO:0016301, GO:0000155, GO:0018106, GO:0004872, GO:0009405, GO:0004674, GO:0030437, GO:0006355, GO:0048315, GO:0030448, GO:0000156, GO:0031137, GO:0007346, GO:0031098, GO:0009272, GO:0051042, GO:0050765, GO:0044011
Pa_1_10110	GO:0005829, GO:0005634, GO:0003677, GO:0008270, GO:0016491, GO:0008061, GO:0043169, GO:0033554, GO:0045329, GO:0006351, GO:0016620, GO:0018485, GO:0009013, GO:0018488, GO:0018479, GO:0004029, GO:0008886, GO:0004030, GO:0004028, GO:0019483, GO:0006081, GO:0006598, GO:0004568, GO:0006032, GO:0004777, GO:0006538
Pa_1_10140	GO:0005634, GO:0003677, GO:0008270, GO:0003700
Pa_1_10160	GO:0005840, GO:0008168, GO:0004497, GO:0009055, GO:0020037, GO:0016705
Pa_1_10180	GO:0005829, GO:0005634, GO:0005515, GO:0016829, GO:0032153, GO:0016020, GO:0000155, GO:0006623, GO:0006914, GO:0015031, GO:0032585, GO:0005774, GO:0000329, GO:0035658, GO:0048278
Pa_1_10190	GO:0005488, GO:0005515, GO:0005768, GO:0005739, GO:0016301, GO:0004674, GO:0015031, GO:0003779, GO:0000139, GO:0016043, GO:0005802, GO:0000902, GO:0007029, GO:0006895, GO:0008360
Pa_1_10200	GO:0005625, GO:0009986, GO:0005576, GO:0005515, GO:0009055, GO:0005509, GO:0006457, GO:0005783, GO:0010181, GO:0045454, GO:0016853, GO:0015035, GO:0006662, GO:0005788, GO:0003756
Pa_1_10240	GO:0005737, GO:0005634, GO:0005622, GO:0005515, GO:0006260, GO:0006281, GO:0005739, GO:0000287, GO:0005730, GO:0043504, GO:0003684, GO:0003887, GO:0005819, GO:0017125, GO:0005657, GO:0070987, GO:0042276, GO:0006261, GO:0004088
Pa_1_10250	GO:0005634
Pa_1_10260	GO:0016021, GO:0005524, GO:0055085, GO:0016301, GO:0005783, GO:0005794, GO:0004674, GO:0004672, GO:0000329
Pa_1_10270	GO:0005737, GO:0016787, GO:0005829, GO:0005634, GO:0033554, GO:0016798, GO:0045437, GO:0070635, GO:0070636, GO:0030433, GO:0034356, GO:0019358, GO:0046135, GO:0008655, GO:0016799
Pa_1_10280	GO:0003677, GO:0008270, GO:0003676, GO:0016702, GO:0006310, GO:0000150
Pa_1_10290	GO:0008270, GO:0005488, GO:0003676
Pa_1_1030	GO:0016772, GO:0016773
Pa_1_10300	GO:0042493, GO:0005515, GO:0030515, GO:0005739, GO:0005730, GO:0030490, GO:0042274, GO:0006364, GO:0032040, GO:0030692, GO:0000480, GO:0000447, GO:0000472
Pa_1_10310	GO:0005634, GO:0016491, GO:0008168, GO:0008033, GO:0004853, GO:0006779
Pa_1_10320	GO:0005829, GO:0005840, GO:0003735, GO:0005515, GO:0016829, GO:0042254, GO:0002181, GO:0006414, GO:0030686, GO:0022625, GO:0070180, GO:0000027
Pa_1_10330	GO:0005737, GO:0005634, GO:0016021, GO:0005515, GO:0005524, GO:0005739, GO:0000287, GO:0016887, GO:0009411, GO:0008094, GO:0007131, GO:0006298, GO:0043504, GO:0030466, GO:0003684, GO:0030983, GO:0032300, GO:0032139, GO:0032137, GO:0000228, GO:0000404, GO:0043570, GO:0000710, GO:0032302, GO:0000406, GO:0000403, GO:0000735, GO:0003879, GO:0000105, GO:0032301, GO:0032135, GO:0000400, GO:0032138, GO:…
Pa_1_10350	GO:0016787, GO:0005829, GO:0008270, GO:0005515, GO:0005975, GO:0030246, GO:0004559, GO:0000329, GO:0006013, GO:0009313, GO:0015923
Pa_1_10360	GO:0005737, GO:0046872, GO:0005829, GO:0005634, GO:0005840, GO:0003735, GO:0006412, GO:0005524, GO:0000226, GO:0005739, GO:0003723, GO:0006457, GO:0015031, GO:0005789, GO:0031072, GO:0051082, GO:0006950, GO:0030433, GO:0009408, GO:0005792, GO:0048471, GO:0072380, GO:0001671, GO:0006458, GO:0042026, GO:0045047, GO:0006626
Pa_1_10370	GO:0005737, GO:0003677, GO:0008270, GO:0003700, GO:0005816, GO:0035556, GO:0006355, GO:0043565, GO:0048189, GO:0000790, GO:0006338, GO:0070211
Pa_1_10390	GO:0006508, GO:0004177, GO:0016746
Pa_1_1040	GO:0005634, GO:0003677, GO:0005622, GO:0008270, GO:0003700, GO:0003824, GO:0003676, GO:0005975, GO:0003723, GO:0000166
Pa_1_10400	GO:0005488
Pa_1_10410	GO:0016021, GO:0006508, GO:0004177, GO:0000139, GO:0030173, GO:0000022
Pa_1_10420	GO:0003677, GO:0008270, GO:0003676
Pa_1_10430	GO:0004872
Pa_1_10440	GO:0005737, GO:0005829, GO:0003743, GO:0005840, GO:0001950, GO:0005515, GO:0005524, GO:0000932, GO:0003676, GO:0003723, GO:0005730, GO:0000462, GO:0008026, GO:0004386, GO:0004004, GO:0006364, GO:0016281, GO:0006397, GO:0051028, GO:0006417, GO:0010494, GO:0000753, GO:0033962, GO:0000290, GO:0034063
Pa_1_10450	GO:0003676, GO:0005509, GO:0000166, GO:0003779
Pa_1_10460	GO:0016616, GO:0050662, GO:0004616, GO:0006098
Pa_1_10470	GO:0016616, GO:0016021, GO:0050662, GO:0045263, GO:0033179, GO:0046933, GO:0015991, GO:0015986
Pa_1_1050	GO:0016787, GO:0004553, GO:0005975, GO:0045493
Pa_1_10510	GO:0005829, GO:0005634, GO:0003677, GO:0005622, GO:0008270, GO:0016829, GO:0006281, GO:0016020, GO:0005739, GO:0000155, GO:0006284, GO:0008833, GO:0003906, GO:0017005, GO:0008311
Pa_1_10520	GO:0005829, GO:0005634, GO:0042493, GO:0005515, GO:0005524, GO:0016301, GO:0004674, GO:0004672, GO:0000075, GO:0000778, GO:0007094, GO:0034501, GO:0031134, GO:0072371, GO:0051455, GO:0051301, GO:0051754, GO:0007067, GO:0033597, GO:0051444, GO:0032837, GO:0070683
Pa_1_10530	GO:0005634, GO:0008270, GO:0003700, GO:0005524, GO:0004674, GO:0015969
Pa_1_10540	GO:0005634, GO:0005625, GO:0001950, GO:0009986, GO:0005576, GO:0030446, GO:0005886, GO:0030445, GO:0005515, GO:0006096, GO:0044416, GO:0032889, GO:0005739, GO:0000287, GO:0000324, GO:0006094, GO:0006950, GO:0000015, GO:0004634, GO:0005624, GO:0044409, GO:0009898
Pa_1_10550	GO:0005737, GO:0005525, GO:0005829, GO:0005634, GO:0005622, GO:0008270, GO:0006508, GO:0005576, GO:0042254, GO:0009277, GO:0004177, GO:0008237, GO:0005739, GO:0015031, GO:0008236, GO:0070006, GO:0030287, GO:0043171, GO:0005977, GO:0044248, GO:0007264, GO:0019370
Pa_1_10570	GO:0005634, GO:0005622, GO:0008270, GO:0006281, GO:0016925
Pa_1_10580	GO:0046872, GO:0003677, GO:0005622, GO:0004222, GO:0006508, GO:0005759, GO:0006281, GO:0004177, GO:0003887, GO:0006879, GO:0006627, GO:0005758
Pa_1_1060	GO:0046872, GO:0003824, GO:0008081
Pa_1_10600	GO:0016021, GO:0005488, GO:0055085, GO:0005739, GO:0006810, GO:0005215, GO:0005743, GO:0015234, GO:0006839, GO:0031305, GO:0030974, GO:0051724, GO:0005477, GO:0006850
Pa_1_10620	GO:0046872, GO:0005840, GO:0042493, GO:0004784, GO:0006801
Pa_1_10625	GO:0005524, GO:0016301, GO:0004674, GO:0016772, GO:0004672, GO:0004713
Pa_1_10630	GO:0046872, GO:0005829, GO:0005634, GO:0008270, GO:0009986, GO:0005576, GO:0030446, GO:0030445, GO:0005739, GO:0009405, GO:0004784, GO:0006801, GO:0005507, GO:0019430, GO:0055114, GO:0071451, GO:0052059
Pa_1_10640	GO:0005622, GO:0008270, GO:0003824, GO:0030170, GO:0008483, GO:0008168, GO:0030151, GO:0008152, GO:0016829, GO:0006777, GO:0009000
Pa_1_10660	GO:0005634, GO:0008270, GO:0003700
Pa_1_10680	GO:0016740, GO:0005829, GO:0005634, GO:0003677, GO:0008270, GO:0016021, GO:0003700, GO:0004579, GO:0008250, GO:0006487
Pa_1_10690	GO:0005829, GO:0005634, GO:0005515, GO:0032153, GO:0051286, GO:0005794, GO:0006888, GO:0007030, GO:0005801, GO:0009306
Pa_1_1070	GO:0050660, GO:0008762, GO:0005524, GO:0004674, GO:0004672
Pa_1_10700	GO:0005829, GO:0008270, GO:0008168, GO:0003676, GO:0005816, GO:0005730, GO:0009452, GO:0001510, GO:0008990, GO:0006387
Pa_1_10720	GO:0003824, GO:0006520, GO:0008299
Pa_1_10730	GO:0007050
Pa_1_10750	GO:0005737, GO:0050660, GO:0003677, GO:0005622, GO:0008270, GO:0016021, GO:0016491, GO:0005515, GO:0005524, GO:0006260, GO:0003676, GO:0006281, GO:0006629, GO:0005730, GO:0045454, GO:0008026, GO:0006310, GO:0043140, GO:0043596, GO:0031422, GO:0006268, GO:0000724, GO:0031573, GO:0045950, GO:0007131, GO:0030071, GO:0034065, GO:0071140, GO:0000723, GO:0009650, GO:0030448, GO:0001302, GO:0031292, GO:…
Pa_1_10760	GO:0005634, GO:0008270, GO:0005840, GO:0003735, GO:0006412, GO:0003700
Pa_1_10770	GO:0005737, GO:0005829, GO:0042493, GO:0005524, GO:0003723, GO:0005730, GO:0017111, GO:0004812, GO:0008312, GO:0006364, GO:0000027, GO:0005732, GO:0004832, GO:0006438, GO:0030687, GO:0008097, GO:0000466, GO:0000463
Pa_1_10780	GO:0016021, GO:0055085, GO:0015103, GO:0042128
Pa_1_10790	GO:0005622, GO:0005524, GO:0006260, GO:0003676, GO:0006281, GO:0006310, GO:0043140
Pa_1_1080	GO:0016787, GO:0008168, GO:0016020, GO:0016798
Pa_1_10800	GO:0005737, GO:0005634, GO:0005524, GO:0003824, GO:0030170, GO:0016829, GO:0016301, GO:0005777, GO:0006520, GO:0016773, GO:0008299, GO:0004123, GO:0080146, GO:0004121, GO:0019343, GO:0019346, GO:0071266, GO:0004496, GO:0019279, GO:0016765, GO:0003961
Pa_1_10810	GO:0016021, GO:0006886, GO:0031227, GO:0016788, GO:0006505
Pa_1_10820	GO:0016021, GO:0005506, GO:0042493, GO:0016491, GO:0005886, GO:0004497, GO:0009055, GO:0020037, GO:0016705, GO:0016020, GO:0070330, GO:0006810, GO:0005789, GO:0010181, GO:0003958, GO:0005792, GO:0022900, GO:0016126, GO:0005741, GO:0006696
Pa_1_10830	GO:0016021, GO:0005886, GO:0016020, GO:0008508, GO:0015104, GO:0015297, GO:0015105, GO:0046685
Pa_1_10850	GO:0005525, GO:0005622, GO:0008168, GO:0004221, GO:0006511, GO:0000290, GO:0007264
Pa_1_10880	GO:0005737, GO:0005829, GO:0005634, GO:0005515, GO:0003723, GO:0030529, GO:0003729, GO:0048255, GO:0043409, GO:0006469, GO:0010834
Pa_1_10890	GO:0005634, GO:0003700, GO:0043565
Pa_1_1090	GO:0008270, GO:0005488, GO:0005524, GO:0030170, GO:0005975, GO:0004645
Pa_1_10900	GO:0005737, GO:0046872, GO:0016787, GO:0005829, GO:0005634, GO:0004170, GO:0046080, GO:0009213, GO:0035870, GO:0035863, GO:0046081
Pa_1_10920	GO:0005737, GO:0046872, GO:0005829, GO:0005634, GO:0005524, GO:0016301, GO:0008478, GO:0009443, GO:0000282
Pa_1_10930	GO:0005829, GO:0005634, GO:0003677, GO:0016021, GO:0022891, GO:0005515, GO:0006260, GO:0006289, GO:0043596, GO:0006284, GO:0006273, GO:0030466, GO:0007346, GO:0005657, GO:0000710, GO:0006301, GO:0043626, GO:0030337, GO:0006275, GO:0034644, GO:0006271, GO:0010212, GO:0006348, GO:0006272, GO:0007064
Pa_1_10940	GO:0005634, GO:0003677, GO:0006260, GO:0043626, GO:0030337, GO:0006275
Pa_1_10960	GO:0005829, GO:0005634, GO:0005622, GO:0005816, GO:0016020, GO:0007165, GO:0003779, GO:0046873, GO:0005096, GO:0006970, GO:0005635, GO:0007264, GO:0005099, GO:0051056, GO:0005826, GO:0030428, GO:0005516, GO:0071519, GO:0071520, GO:0000917, GO:0000142, GO:0008092, GO:0032187, GO:0000915, GO:0007015, GO:0007049, GO:0000910, GO:0007265, GO:0032005
Pa_1_10970	GO:0005737, GO:0046872, GO:0005829, GO:0042493, GO:0016491, GO:0005625, GO:0001950, GO:0005515, GO:0044416, GO:0003824, GO:0003682, GO:0055114, GO:0003938, GO:0006177, GO:0006183, GO:0000785
Pa_1_10980	GO:0005737, GO:0003677, GO:0005488, GO:0016491, GO:0005515, GO:0003729, GO:0004754, GO:0009085, GO:0019878
Pa_1_10990	GO:0005634, GO:0003677, GO:0008270, GO:0003700, GO:0006281, GO:0006351, GO:0004519, GO:0042128
Pa_1_11010	GO:0005524, GO:0008233, GO:0017111
Pa_1_11020	GO:0008270, GO:0005515, GO:0016301, GO:0010008, GO:0045324, GO:0006914, GO:0006995, GO:0032258, GO:0016236, GO:0005774, GO:0030433, GO:0034271, GO:0006661, GO:0042147, GO:0000300, GO:0034272, GO:0030242, GO:0034727
Pa_1_11030	GO:0006886, GO:0016192, GO:0006896, GO:0016020, GO:0000324, GO:0045324, GO:0048278, GO:0030173, GO:0005484, GO:0006891, GO:0031902, GO:0042144, GO:0006906
Pa_1_11040	GO:0005737, GO:0005829, GO:0003677, GO:0006807, GO:0016151, GO:0009039, GO:0019627
Pa_1_11050	GO:0005737, GO:0003677, GO:0016151, GO:0009039, GO:0019627
Pa_1_11070	GO:0005576, GO:0030248, GO:0030245, GO:0008810, GO:0005975
Pa_1_11080	GO:0006457, GO:0031072, GO:0051082, GO:0006950
Pa_1_11090	GO:0005737, GO:0046872, GO:0005829, GO:0005634, GO:0042493, GO:0005515, GO:0005524, GO:0071775, GO:0031505, GO:0016301, GO:0009405, GO:0005783, GO:0004674, GO:0005730, GO:0000747, GO:0006355, GO:0006351, GO:0004672, GO:0030448, GO:0034599, GO:0009272, GO:0006338, GO:0051301, GO:0007067, GO:0004713, GO:0005956, GO:0031931, GO:0031932, GO:0007163, GO:0031929, GO:0019722, GO:0034456, GO:0001300, GO:…
Pa_1_1110	GO:0050660, GO:0008762, GO:0005777, GO:0015945, GO:0018695, GO:0018465
Pa_1_11100	GO:0046872, GO:0016021, GO:0006508, GO:0004177, GO:0008237, GO:0004180, GO:0008233, GO:0004872, GO:0007218, GO:0006623, GO:0003755, GO:0006457, GO:0005783, GO:0071627, GO:0043328
Pa_1_11110	GO:0016021, GO:0008643, GO:0005886, GO:0055085, GO:0005215, GO:0015450, GO:0004035
Pa_1_11120	GO:0004497, GO:0009055, GO:0020037, GO:0016705, GO:0070330
Pa_1_11130	GO:0016021, GO:0016491, GO:0005886, GO:0055085, GO:0005215, GO:0004642, GO:0006189
Pa_1_11140	GO:0016740, GO:0005634, GO:0003677, GO:0008270, GO:0005515, GO:0003676, GO:0006351, GO:0000991, GO:0003746, GO:0032784, GO:0006357, GO:0006354, GO:0006379, GO:0006368, GO:0005654, GO:0001139, GO:0000993, GO:0001012, GO:0045899, GO:0032968, GO:0031564, GO:0006362, GO:0042797
Pa_1_11150	GO:0005634, GO:0003677, GO:0005576, GO:0005886, GO:0042710, GO:0005618, GO:0031225, GO:0005935, GO:0000128, GO:0001403, GO:0007124
Pa_1_11160	GO:0016884, GO:0005622, GO:0016021, GO:0006464, GO:0005739, GO:0005283, GO:0016881
Pa_1_11170	GO:0016740, GO:0005737, GO:0016021, GO:0003824, GO:0030170, GO:0016829, GO:0005739, GO:0019343, GO:0005741, GO:0004124, GO:0006535, GO:0004122
Pa_1_11200	GO:0005737, GO:0005759, GO:0005524, GO:0003676, GO:0005739, GO:0000049, GO:0004812, GO:0006418, GO:0004815, GO:0070146, GO:0006422
Pa_1_11210	GO:0005829, GO:0005886, GO:0030276, GO:0005935, GO:0030118, GO:0005545, GO:0048268, GO:0005543, GO:0030479, GO:0006897
Pa_1_11220	GO:0005829, GO:0005634, GO:0006367, GO:0003743, GO:0008270, GO:0006508, GO:0005515, GO:0000079, GO:0016301, GO:0016874, GO:0006355, GO:0004252, GO:0006351, GO:0006289, GO:0007049, GO:0070985, GO:0070816, GO:0006366, GO:0005675, GO:0000112
Pa_1_11230	GO:0005737, GO:0005634, GO:0005874, GO:0051301, GO:0007067, GO:0000741
Pa_1_11240	GO:0006457, GO:0051082, GO:0016272
Pa_1_11250	GO:0006508, GO:0004252
Pa_1_11260	GO:0016021
Pa_1_11270	GO:0005829, GO:0016021, GO:0005886, GO:0009055, GO:0020037, GO:0016705, GO:0016746, GO:0005783, GO:0005789, GO:0030448, GO:0044011, GO:0006506, GO:0008374, GO:0015293, GO:0019563, GO:0015793
Pa_1_11280	GO:0005488, GO:0016874, GO:0006189, GO:0016597, GO:0008864, GO:0016742
Pa_1_11290	GO:0016773, GO:0004747, GO:0006014
Pa_1_11300	GO:0005737, GO:0046872, GO:0005829, GO:0005524, GO:0003676, GO:0005739, GO:0000049, GO:0004813, GO:0006419, GO:0070143
Pa_1_11330	GO:0046872, GO:0005515, GO:0003824, GO:0005739, GO:0005635, GO:0004722, GO:0006470
Pa_1_11350	GO:0005737, GO:0005829, GO:0005634, GO:0008168, GO:0000166, GO:0018064, GO:0042038
Pa_1_11360	GO:0050660, GO:0005488, GO:0016491, GO:0004497, GO:0050661, GO:0004499, GO:0018660
Pa_1_11380	GO:0005525, GO:0016787, GO:0005488, GO:0005524, GO:0016301, GO:0006629, GO:0006915, GO:0006952, GO:0005871, GO:0003777, GO:0042802, GO:0017111
Pa_1_11390	GO:0005739, GO:0006094, GO:0005758, GO:0006111, GO:0015976
Pa_1_11400	GO:0005634, GO:0005622, GO:0005515, GO:0005524, GO:0003676, GO:0020037, GO:0042254, GO:0005739, GO:0003723, GO:0005730, GO:0006810, GO:0000462, GO:0008026, GO:0004386, GO:0004004, GO:0006364, GO:0030686, GO:0006397, GO:0000466, GO:0000463, GO:0003724, GO:0008186, GO:0000349, GO:0071014, GO:0000390, GO:0005681, GO:0046540, GO:0005682, GO:0045292, GO:0010508
Pa_1_11410	GO:0005524, GO:0003676, GO:0008026
Pa_1_11420	GO:0005525, GO:0020037, GO:0016020, GO:0046873, GO:0003924, GO:0003746
Pa_1_11430	GO:0005737, GO:0005829, GO:0005759, GO:0005524, GO:0005739, GO:0002181, GO:0004812, GO:0006418, GO:0004829, GO:0006435, GO:0070159
Pa_1_11450	GO:0016740, GO:0005737
Pa_1_11460	GO:0006412, GO:0016021, GO:0005488, GO:0030515, GO:0005975, GO:0005730, GO:0030490, GO:0005819, GO:0006364, GO:0032040, GO:0000480, GO:0000447, GO:0000472, GO:0005732, GO:0005381, GO:0016539, GO:0030060, GO:0006108
Pa_1_11470	GO:0016020, GO:0046873
Pa_1_11480	GO:0016787, GO:0005634, GO:0009116, GO:0005576, GO:0006260, GO:0030131, GO:0006886, GO:0016192, GO:0005975, GO:0016020, GO:0030145, GO:0000287, GO:0005509, GO:0004571, GO:0006457, GO:0004588, GO:0006221, GO:0004559, GO:0044431, GO:0031072, GO:0051082, GO:0060205
Pa_1_11490	GO:0016740, GO:0005737, GO:0005829, GO:0005634, GO:0005524, GO:0006355, GO:0004829, GO:0006435
Pa_1_115	GO:0016787, GO:0005634, GO:0003677, GO:0005840, GO:0003735, GO:0006412, GO:0003676, GO:0006281, GO:0006355, GO:0004519, GO:0006310
Pa_1_11500	GO:0005737, GO:0005829, GO:0005634, GO:0001950, GO:0005576, GO:0030446, GO:0005886, GO:0031225, GO:0009277, GO:0046658, GO:0009405, GO:0005783, GO:0005794, GO:0007165, GO:0004620, GO:0009395, GO:0004622, GO:0006650, GO:0046488, GO:0006660, GO:0004623, GO:0044001, GO:0009897, GO:0046475, GO:0031670, GO:0071470, GO:0031138
Pa_1_11510	GO:0005829, GO:0005634, GO:0051287, GO:0005622, GO:0008270, GO:0005515, GO:0005524, GO:0000105, GO:0004399, GO:0004635, GO:0004636, GO:0044406, GO:0007155
Pa_1_11520	GO:0003677, GO:0003743, GO:0005622, GO:0006464, GO:0016881, GO:0006352
Pa_1_11530	GO:0016787, GO:0005829, GO:0005488, GO:0005515, GO:0033554, GO:0030437, GO:0005789, GO:0006355, GO:0006351, GO:0000070, GO:0008654, GO:0007029, GO:0005624, GO:0006998, GO:0071071, GO:0031965, GO:0008195, GO:0009060, GO:0034389, GO:0006276
Pa_1_11570	GO:0005488, GO:0016491, GO:0005777, GO:0003884, GO:0016641, GO:0008445
Pa_1_11580	GO:0005634, GO:0003700, GO:0006508, GO:0004872, GO:0004197, GO:0043565
Pa_1_11600	GO:0008270, GO:0016021, GO:0000324, GO:0005794, GO:0005789, GO:0051536, GO:0000329, GO:0031965, GO:0008324, GO:0031966, GO:0005385, GO:0006882, GO:0006824, GO:0006749, GO:0046686, GO:0015087, GO:0006876, GO:0006877
Pa_1_11610	GO:0005634, GO:0003677, GO:0008270, GO:0003700, GO:0006351
Pa_1_11620	GO:0005737, GO:0005840, GO:0003735, GO:0006412, GO:0016021, GO:0016491, GO:0005625, GO:0005886, GO:0005515, GO:0005524, GO:0020037, GO:0006886, GO:0016192, GO:0005789, GO:0034599, GO:0005792, GO:0005758, GO:0005741, GO:0006696, GO:0004128, GO:0031307, GO:0004814, GO:0006420
Pa_1_11640	GO:0005737, GO:0005829, GO:0005634, GO:0006367, GO:0006914, GO:0015031, GO:0006364, GO:0006397, GO:0006352, GO:0004721, GO:0005847, GO:0006369, GO:0009302, GO:0030847, GO:0030846, GO:0008234
Pa_1_11650	GO:0051286, GO:0000131, GO:0009405, GO:0008360, GO:0000282, GO:0007015, GO:0005935, GO:0007124, GO:0031560, GO:0031561, GO:0031562, GO:0030952, GO:0008104, GO:0005934, GO:0043332, GO:0000133, GO:0005519, GO:0007121, GO:0031384, GO:0031385, GO:0007266
Pa_1_11680	GO:0003677, GO:0016020, GO:0006355, GO:0046873, GO:0010508
Pa_1_11710	GO:0005829, GO:0032153, GO:0005816, GO:0007126, GO:0000070, GO:0051301, GO:0000941, GO:0031617, GO:0051010, GO:0008608, GO:0034613, GO:0019236
Pa_1_11720	GO:0005634, GO:0005840, GO:0003735, GO:0006412, GO:0042254, GO:0022627, GO:0019843
Pa_1_11750	GO:0005829, GO:0009116, GO:0004616, GO:0006098, GO:0005625, GO:0001950, GO:0005739, GO:0033554, GO:0050661, GO:0034599, GO:0009051, GO:0016763
Pa_1_11760	GO:0005829, GO:0006367, GO:0003743, GO:0005840, GO:0003735, GO:0006412, GO:0005488, GO:0005515, GO:0006355, GO:0005669, GO:0000991, GO:0051123, GO:0016973
Pa_1_11770	GO:0005634, GO:0003676, GO:0003723, GO:0007126, GO:0000166
Pa_1_11780	GO:0005622, GO:0008270, GO:0016021, GO:0008643, GO:0005488, GO:0055085, GO:0005794, GO:0030663, GO:0015786
Pa_1_11790	GO:0016787, GO:0005829, GO:0005634, GO:0016021, GO:0033554, GO:0004339, GO:0005976
Pa_1_11800	GO:0003677
Pa_1_11810	GO:0005840
Pa_1_11820	GO:0005515, GO:0009055, GO:0006810, GO:0005743, GO:0022900, GO:0005747, GO:0008137, GO:0006917, GO:0006120, GO:0030308, GO:0072593, GO:0070469, GO:0044238
Pa_1_11830	GO:0005634, GO:0003677, GO:0008270, GO:0042710, GO:0003676, GO:0005739, GO:0003723, GO:0005730, GO:0000166, GO:0006351, GO:0030529, GO:0006950, GO:0006364, GO:0006397, GO:0005732, GO:0007000, GO:0003697, GO:0000028
Pa_1_11850	GO:0005829, GO:0016616, GO:0005488, GO:0016491, GO:0005759, GO:0005625, GO:0005743, GO:0016620, GO:0004029, GO:0004030, GO:0003842, GO:0006561, GO:0006537, GO:0004735, GO:0010133, GO:0004144, GO:0033721, GO:0019413, GO:0008802
Pa_1_11860	GO:0005634, GO:0003677, GO:0005488, GO:0006355
Pa_1_11870	GO:0016740, GO:0016747, GO:0008270, GO:0005488, GO:0016491, GO:0048037, GO:0008168, GO:0020037, GO:0016301, GO:0016746, GO:0006629, GO:0035556, GO:0000036, GO:0031177, GO:0009058, GO:0016874, GO:0050637, GO:0047462, GO:0050564, GO:0004629, GO:0004318, GO:0004043
Pa_1_11890	GO:0005829, GO:0005634, GO:0003677, GO:0005622, GO:0008270, GO:0016021, GO:0006508, GO:0005886, GO:0003676, GO:0016192, GO:0032153, GO:0051286, GO:0016020, GO:0000131, GO:0003723, GO:0005509, GO:0010008, GO:0018024, GO:0015031, GO:0005789, GO:0012507, GO:0005089, GO:0035023, GO:0000166, GO:0035556, GO:0003779, GO:0004252, GO:0046873, GO:0030448, GO:0009272, GO:0006397, GO:0005826, GO:0000915, GO:…
Pa_1_11920	GO:0006725, GO:0016773, GO:0007229, GO:0016830
Pa_1_11940	GO:0006725, GO:0016830, GO:0008672
Pa_1_11950	GO:0003676, GO:0030529
Pa_1_11960	GO:0016787, GO:0005829, GO:0005634, GO:0033554, GO:0016798, GO:0045437, GO:0070635, GO:0070636, GO:0034356, GO:0019358, GO:0046135, GO:0008655, GO:0016799, GO:0008477
Pa_1_11990	GO:0008270, GO:0016491
Pa_1_12000	GO:0016021, GO:0006508, GO:0004252
Pa_1_12010	GO:0005488, GO:0005886, GO:0005741
Pa_1_12025	GO:0005634, GO:0003677, GO:0043565, GO:0000786, GO:0006334
Pa_1_12030	GO:0003677, GO:0008270, GO:0005515, GO:0006355, GO:0000790, GO:0006338, GO:0006974, GO:0006357, GO:0006368, GO:0016586, GO:0043044, GO:0006337, GO:0006606
Pa_1_12040	GO:0005829, GO:0005515, GO:0000932, GO:0032153, GO:0060237, GO:0005739, GO:0003723, GO:0004872, GO:0009405, GO:0033554, GO:0005730, GO:0000049, GO:0004519, GO:0000070, GO:0008298, GO:0070478, GO:0007346, GO:0010494, GO:0051301, GO:0007067, GO:0007049, GO:0005935, GO:0034613, GO:0004540, GO:0004527, GO:0000177, GO:0000176, GO:0000175, GO:0008536, GO:0000467, GO:0000465, GO:0070651, GO:0071042, GO:…
Pa_1_12050	GO:0005525, GO:0005622, GO:0042493, GO:0005515, GO:0042254, GO:0005816, GO:0003723, GO:0015031, GO:0005730, GO:0003924, GO:0006364, GO:0051301, GO:0030687, GO:0005654, GO:0000055, GO:0040010
Pa_1_12060	GO:0005737, GO:0016787, GO:0005634, GO:0006071, GO:0005625, GO:0005515, GO:0003824, GO:0006970, GO:0071470, GO:0003850, GO:0000121, GO:0006114, GO:0016791
Pa_1_12070	GO:0005634, GO:0003700, GO:0043565
Pa_1_12080	GO:0005737, GO:0046872, GO:0005829, GO:0005634, GO:0003677, GO:0008270, GO:0016021, GO:0042493, GO:0005886, GO:0005515, GO:0005524, GO:0055085, GO:0032153, GO:0051286, GO:0031505, GO:0004674, GO:0030435, GO:0006351, GO:0004672, GO:0007346, GO:0031098, GO:0008360, GO:0051301, GO:0004713, GO:0030428, GO:0007049, GO:0032005, GO:0030242, GO:0051519, GO:0000165, GO:0005935, GO:0071470, GO:0005934, GO:…
Pa_1_12090	GO:0016301
Pa_1_1210	GO:0016998, GO:0019867
Pa_1_12100	GO:0016021
Pa_1_12110	GO:0005634, GO:0003677, GO:0008270, GO:0005488, GO:0005515, GO:0005524, GO:0003676, GO:0003723, GO:0004674, GO:0000166, GO:0004386, GO:0006397, GO:0005681, GO:0008380, GO:0000243, GO:0005685, GO:0000395, GO:0071004, GO:0000398, GO:0004482, GO:0006370
Pa_1_12120	GO:0046872, GO:0005829, GO:0005634, GO:0003743, GO:0005506, GO:0005524, GO:0009055, GO:0020037, GO:0016887, GO:0051536, GO:0006415, GO:0006364, GO:0022626, GO:0042273, GO:0000054, GO:0006413, GO:0051539
Pa_1_12130	GO:0005634, GO:0003677, GO:0008270, GO:0042493, GO:0005515, GO:0005524, GO:0030447, GO:0005739, GO:0006355, GO:0006351, GO:0016887, GO:0030702, GO:0008094, GO:0000070, GO:0004386, GO:0004003, GO:0030466, GO:0000790, GO:0006338, GO:0006348, GO:0003746, GO:0006354, GO:0006368, GO:0006369, GO:0003697, GO:0043044, GO:0031934, GO:0045944, GO:0060303, GO:0000124, GO:0046695, GO:0008023, GO:0016584, GO:…
Pa_1_12140	GO:0005737, GO:0005634, GO:0003677, GO:0008270, GO:0003700, GO:0016811, GO:0070403, GO:0006342, GO:0006476, GO:0005730, GO:0006351, GO:0030702, GO:0000070, GO:0000790, GO:0006338, GO:0006348, GO:0006974, GO:0060303, GO:0016585, GO:0017136, GO:0003714, GO:0071572, GO:2000283, GO:0000122, GO:0006282, GO:0016575, GO:0046459, GO:0004407, GO:0048869, GO:0045595
Pa_1_1215	GO:0005488
Pa_1_12150	GO:0005634, GO:0016491, GO:0006355, GO:0006351, GO:0004746, GO:0009231
Pa_1_12160	GO:0005488, GO:0016491
Pa_1_12200	GO:0005634, GO:0016021, GO:0004222, GO:0006508, GO:0006355, GO:0005216
Pa_1_12210	GO:0003677, GO:0016021, GO:0005515, GO:0005524, GO:0009055, GO:0020037, GO:0016705, GO:0005789, GO:0004386, GO:0009272, GO:0000139, GO:0006487, GO:0000917, GO:0016758, GO:0000136, GO:0000009, GO:0007114, GO:0000032, GO:0006491, GO:0006080, GO:0031278, GO:0042125, GO:0006493
Pa_1_12220	GO:0016787, GO:0016021, GO:0005488, GO:0004222, GO:0006508, GO:0005886, GO:0004553, GO:0030245, GO:0005975, GO:0031225, GO:0016020, GO:0009277, GO:0042972, GO:0033903, GO:0004514, GO:0009435, GO:0044275, GO:0004415, GO:0042973
Pa_1_12230	GO:0008270, GO:0016491, GO:0004222, GO:0006508, GO:0005739, GO:0004252, GO:0008033, GO:0000002, GO:0072670
Pa_1_12250	GO:0005737, GO:0005829, GO:0005634, GO:0005515, GO:0005789, GO:0005635, GO:0007346, GO:0005839, GO:0004298, GO:0051603, GO:0000502, GO:0019774, GO:0034515, GO:0043161, GO:0010499, GO:0080129
Pa_1_12260	GO:0005829, GO:0005634, GO:0016757, GO:0016020, GO:0007039, GO:0005773, GO:0000329, GO:0005977, GO:0000122, GO:0000164, GO:0008599, GO:0006109, GO:0042149
Pa_1_12270	GO:0016740, GO:0005737, GO:0005634, GO:0005759, GO:0008168, GO:0000166, GO:0035091, GO:0007154, GO:0003899, GO:0009019
Pa_1_12280	GO:0016706
Pa_1_12290	GO:0016021, GO:0005789, GO:0016765, GO:0031965, GO:0005811, GO:0008834, GO:0006486
Pa_1_12300	GO:0005737, GO:0005829, GO:0005634, GO:0005515, GO:0006886, GO:0032153, GO:0005816, GO:0015031, GO:0048278, GO:0006906, GO:0043332, GO:0007121, GO:0006887, GO:0000145, GO:0006893, GO:0006904, GO:0051285, GO:0000920
Pa_1_12310	GO:0005759, GO:0005739, GO:0003723, GO:0000036, GO:0006397, GO:0004540, GO:0004527, GO:0008859, GO:0000965
Pa_1_12320	GO:0009986, GO:0005576, GO:0003824, GO:0030170, GO:0004553, GO:0030245, GO:0005975, GO:0005618, GO:0007047, GO:0009277, GO:0043169, GO:0005783, GO:0000747, GO:0009058, GO:0016798, GO:0008422, GO:0004338, GO:0007109, GO:0016769
Pa_1_12330	GO:0005737, GO:0005829, GO:0005634, GO:0005488, GO:0005886, GO:0032153, GO:0051286, GO:0005816, GO:0007047, GO:0016020, GO:0000131, GO:0030437, GO:0030435, GO:0006970, GO:0005507, GO:0000910, GO:0005935, GO:0008047, GO:0034221, GO:0006038, GO:0043461, GO:0008131, GO:0048038, GO:0009308, GO:0005628, GO:0006031
Pa_1_12340	GO:0016740, GO:0016021, GO:0005886, GO:0005524, GO:0020037, GO:0007047, GO:0000131, GO:0009405, GO:0030448, GO:0030428, GO:0000910, GO:0005935, GO:0043332, GO:0016758, GO:0034221, GO:0006038, GO:0005628, GO:0004100, GO:0009612, GO:0045009, GO:0030476, GO:0030659, GO:0016459, GO:0003774
Pa_1_12350	GO:0005829
Pa_1_12360	GO:0016021, GO:0055085, GO:0016020, GO:0005794, GO:0005215, GO:0050661, GO:0035091, GO:0007154, GO:0000329, GO:0015293, GO:0004345, GO:0006006, GO:0005887, GO:0015151, GO:0015768, GO:0015770, GO:0006814
Pa_1_12370	GO:0005737, GO:0005829, GO:0005524, GO:0016757, GO:0000287, GO:0006298, GO:0030983, GO:0003879, GO:0000105
Pa_1_12380	GO:0003677, GO:0005840, GO:0003735, GO:0006412, GO:0000070, GO:0005639, GO:0043007
Pa_1_1240	GO:0005737, GO:0005829, GO:0005634, GO:0003677, GO:0005622, GO:0008270, GO:0016021, GO:0003700, GO:0016491, GO:0009986, GO:0030446, GO:0042710, GO:0003676, GO:0055085, GO:0016301, GO:0009405, GO:0033554, GO:0000166, GO:0005216, GO:0005249, GO:0006813, GO:0005244, GO:0018456, GO:0007160
Pa_1_12400	GO:0005634, GO:0003677, GO:0006355, GO:0006351
Pa_1_12410	GO:0016616, GO:0005622, GO:0005488, GO:0006396, GO:0006561, GO:0004735
Pa_1_12420	GO:0005737, GO:0005829, GO:0005634, GO:0005515, GO:0003723, GO:0004872, GO:0005730, GO:0005643, GO:0017056, GO:0005819, GO:0051028, GO:0031965, GO:0016973, GO:0000055, GO:0042272, GO:0006406, GO:0046982
Pa_1_12430	GO:0016787, GO:0005829, GO:0005634, GO:0003677, GO:0005524, GO:0003676, GO:0006281, GO:0005730, GO:0008026, GO:0043140, GO:0004386, GO:0071821, GO:0009378, GO:0033567, GO:2000042, GO:0071932, GO:0000732, GO:0043138, GO:0070336, GO:0060543
Pa_1_12440	GO:0005634, GO:0003677, GO:0005622, GO:0008270, GO:0003676, GO:0006355, GO:0006351
Pa_1_12470	GO:0005829, GO:0005634, GO:0005488, GO:0005759, GO:0005739, GO:0008677, GO:0000002, GO:0009097
Pa_1_12480	GO:0016740, GO:0016021, GO:0042493, GO:0005886, GO:0005515, GO:0016020, GO:0031505, GO:0009405, GO:0005789, GO:0030448, GO:0044011, GO:0031965, GO:0000032, GO:0006493, GO:0046982, GO:0000030, GO:0004169, GO:0005338, GO:0031502, GO:0000752, GO:0071937, GO:0035269, GO:0045861, GO:0032527, GO:0016888
Pa_1_12490	GO:0004497, GO:0009055, GO:0020037, GO:0016705, GO:0070330
Pa_1_12500	GO:0003677, GO:0006355
Pa_1_12510	GO:0016021, GO:0005524, GO:0042626, GO:0005739, GO:0000324, GO:0000329, GO:0032440, GO:0015432, GO:0015893, GO:0010038
Pa_1_12520	GO:0016787, GO:0005829, GO:0005634, GO:0005488, GO:0016491, GO:0033554, GO:0005782, GO:0003857, GO:0004300, GO:0006635, GO:0008874, GO:0030283, GO:0047936, GO:0008709
Pa_1_12540	GO:0003824, GO:0006281, GO:0006284
Pa_1_12550	GO:0016021, GO:0005886, GO:0005524, GO:0009055, GO:0020037, GO:0006810, GO:0017111, GO:0005743, GO:0022900, GO:0070469, GO:0008121, GO:0022904, GO:0005750, GO:0045153, GO:0006122, GO:0044238
Pa_1_12560	GO:0005737, GO:0005829, GO:0005634, GO:0005524, GO:0016829, GO:0016020, GO:0005739, GO:0016887, GO:0006950, GO:0003849, GO:0009073
Pa_1_12570	GO:0016021, GO:0003824, GO:0004872, GO:0005789
Pa_1_12580	GO:0005737, GO:0005829, GO:0005634, GO:0005488, GO:0005515, GO:0003755, GO:0006457, GO:0005794, GO:0016853, GO:0006950, GO:0005788, GO:0000151, GO:0004842, GO:0042277, GO:0007088
Pa_1_12590	GO:0005829, GO:0005634, GO:0016491, GO:0004497, GO:0020037, GO:0006810, GO:0010181, GO:0034599, GO:0005758, GO:0022900, GO:0070469, GO:0050040, GO:0004460, GO:0006089, GO:0003973
Pa_1_1260	GO:0005524, GO:0004674, GO:0004672
Pa_1_12600	GO:0005829, GO:0005515, GO:0055085, GO:0015031, GO:0005643, GO:0006810, GO:0031965, GO:0016973, GO:0031080, GO:0006407
Pa_1_12630	GO:0008270, GO:0005515, GO:0071775, GO:0004872, GO:0016788, GO:0006629, GO:0005826, GO:0000915, GO:0034613, GO:0031097, GO:0000916, GO:0034259, GO:0035024
Pa_1_12640	GO:0003677, GO:0016021, GO:0005886, GO:0055085, GO:0005739, GO:0005789, GO:0005215, GO:0006310, GO:0015293, GO:0015074
Pa_1_12650	GO:0005525, GO:0046872, GO:0005488, GO:0005524, GO:0003824, GO:0005739, GO:0016874, GO:0004776, GO:0004775, GO:0003878, GO:0006099, GO:0042709, GO:0006104, GO:0042645, GO:0044238
Pa_1_12660	GO:0005758
Pa_1_12670	GO:0005525, GO:0042710, GO:0005524, GO:0030447, GO:0006623, GO:0005794, GO:0007126, GO:0005874, GO:0005777, GO:0042803, GO:0004672, GO:0003924, GO:0046933, GO:0015991, GO:0051301, GO:0005624, GO:0005741, GO:0001300, GO:0006897, GO:0030036, GO:0003774, GO:0000266, GO:0000001, GO:0016559, GO:0051260, GO:0006944, GO:0034643, GO:0033955, GO:0007031, GO:0045053, GO:0060988, GO:0033180, GO:0046961, GO:…
Pa_1_12680	GO:0005622, GO:0008270
Pa_1_12690	GO:0016787, GO:0005829, GO:0005634, GO:0016021, GO:0009986, GO:0005576, GO:0005886, GO:0003824, GO:0016192, GO:0005975, GO:0005618, GO:0031225, GO:0043169, GO:0005509, GO:0005783, GO:0030246, GO:0016052, GO:0009272, GO:0008360, GO:0009897, GO:0004339, GO:0005976, GO:0030476, GO:0004556, GO:0051060, GO:0044247, GO:0046379, GO:0019028, GO:0000272
Pa_1_12700	GO:0005829, GO:0005634, GO:0003677, GO:0008270, GO:0016021, GO:0003700, GO:0016491, GO:0000166, GO:0006351
Pa_1_12710	GO:0046872, GO:0005829, GO:0005634, GO:0005515, GO:0009055, GO:0051537, GO:0045454, GO:0034599, GO:0015035, GO:0006879, GO:0019430, GO:0030036, GO:0008794
Pa_1_12730	GO:0005737, GO:0005622, GO:0032153, GO:0051286, GO:0003779, GO:0030479, GO:0008104, GO:0043332, GO:0000147, GO:0030036, GO:0030427, GO:0051015, GO:0005856
Pa_1_12750	GO:0005622, GO:0005488, GO:0006396
Pa_1_12770	GO:0005634, GO:0003677, GO:0005622, GO:0008270, GO:0003700, GO:0003676, GO:0006281, GO:0018024, GO:0006355, GO:0000228, GO:0006338, GO:0000785, GO:0006357, GO:0016592, GO:0001104, GO:0000781
Pa_1_12780	GO:0005829, GO:0005886, GO:0005524, GO:0007035, GO:0000329, GO:0015991, GO:0033180, GO:0046961, GO:0016820, GO:0008553, GO:0000221
Pa_1_12790	GO:0005737, GO:0005829, GO:0005634, GO:0005515, GO:0005524, GO:0016301, GO:0006298, GO:0030983, GO:0004020, GO:0000103, GO:0019344, GO:0009086, GO:0004781
Pa_1_12800	GO:0016021, GO:0031966
Pa_1_12820	GO:0042493, GO:0005488, GO:0005515, GO:0042254, GO:0004553, GO:0005975, GO:0000027, GO:0030690
Pa_1_12830	GO:0005737, GO:0005524, GO:0005739, GO:0006457, GO:0004812, GO:0006418, GO:0051082, GO:0016272, GO:0004827, GO:0006433
Pa_1_12840	GO:0016740, GO:0005737, GO:0003824, GO:0006777, GO:0004497, GO:0009055, GO:0020037, GO:0016705, GO:0005975, GO:0043169, GO:0016810
Pa_1_12850	GO:0005829, GO:0005634, GO:0016021, GO:0022857, GO:0042493, GO:0005524, GO:0003676, GO:0055085, GO:0005783, GO:0033554, GO:0015031, GO:0000747, GO:0008026, GO:0031142, GO:0005887, GO:0015197, GO:0006857, GO:0015833, GO:0034634, GO:0071276, GO:0005427, GO:0006790, GO:0015198
Pa_1_12860	GO:0016740, GO:0005737, GO:0016787, GO:0005524, GO:0003676, GO:0030447, GO:0016020, GO:0005739, GO:0004812, GO:0008654, GO:0004815, GO:0006422, GO:0008808, GO:0032048, GO:0007006
Pa_1_1290	GO:0016740, GO:0004364, GO:0004871
Pa_1_12910	GO:0008270, GO:0016301, GO:0016772
Pa_1_12920	GO:0016021, GO:0005886, GO:0005743, GO:0005507, GO:0006878, GO:0006825, GO:0008535, GO:0016531
Pa_1_12930	GO:0005737, GO:0005829, GO:0005634, GO:0016021, GO:0005515, GO:0005524, GO:0055085, GO:0016301, GO:0016772, GO:0016773, GO:0004103, GO:0004305, GO:0006646
Pa_1_12940	GO:0046872, GO:0016787, GO:0005829, GO:0005634, GO:0005625, GO:0016020, GO:0000324, GO:0005783, GO:0033554, GO:0016788, GO:0000166, GO:0009166
Pa_1_12950	GO:0005737, GO:0005829, GO:0042493, GO:0005515, GO:0005524, GO:0003779, GO:0006397, GO:0005681, GO:0045292, GO:0008380, GO:0016459, GO:0003774
Pa_1_12960	GO:0016740, GO:0016021, GO:0005886, GO:0005515, GO:0005789, GO:0005635, GO:0004579, GO:0008250, GO:0007049, GO:0018279
Pa_1_12970	GO:0005515, GO:0009055, GO:0006810, GO:0005747, GO:0008137, GO:0006917, GO:0006120, GO:0030308, GO:0072593, GO:0044238
Pa_1_12980	GO:0046872, GO:0005829, GO:0005488, GO:0005625, GO:0006886, GO:0016020, GO:0031505, GO:0005739, GO:0005789, GO:0009268, GO:0004579, GO:0000300, GO:0018279
Pa_1_12990	GO:0006508, GO:0005576, GO:0000324, GO:0007039, GO:0009405, GO:0005794, GO:0006914, GO:0006995, GO:0000747, GO:0030435, GO:0004252, GO:0042802, GO:0005773, GO:0051603, GO:0043086, GO:0019863, GO:0005619, GO:0000328, GO:0009267, GO:0051171, GO:0006401, GO:0007033
Pa_1_130	GO:0016787, GO:0005634, GO:0005840, GO:0003735, GO:0006412, GO:0005515, GO:0022627, GO:0002181, GO:0006364, GO:0000447, GO:0006414, GO:0016706, GO:0000461
Pa_1_13010	GO:0050660, GO:0008762, GO:0016021, GO:0004497, GO:0055085
Pa_1_13020	GO:0005488, GO:0005886, GO:0005739, GO:0004674, GO:0006355, GO:0016592, GO:0001104, GO:0090002
Pa_1_13030	GO:0005488, GO:0005759, GO:0051082, GO:0043461, GO:0033615
Pa_1_13040	GO:0005634, GO:0003677, GO:0005576, GO:0005524, GO:0030248, GO:0004553, GO:0005975, GO:0017111
Pa_1_13050	GO:0005524, GO:0016020, GO:0016779, GO:0016772
Pa_1_13070	GO:0005622, GO:0008270, GO:0003676
Pa_1_13080	GO:0005737, GO:0003677, GO:0016021, GO:0022857, GO:0005886, GO:0005524, GO:0055085, GO:0006281, GO:0005874, GO:0005215, GO:0003777, GO:0000329, GO:0015293, GO:0017183, GO:0007018, GO:0032217
Pa_1_13110	GO:0050660, GO:0016021, GO:0005524, GO:0055085, GO:0016020, GO:0004674, GO:0016614, GO:0046873, GO:0016772, GO:0004672
Pa_1_13120	GO:0050660, GO:0008762, GO:0016020, GO:0003885
Pa_1_13130	GO:0005622, GO:0003676
Pa_1_13140	GO:0016740, GO:0005737, GO:0046872, GO:0005829, GO:0005622, GO:0008270, GO:0016021, GO:0005524, GO:0003676, GO:0005739, GO:0016301, GO:0009058, GO:0006807, GO:0006520, GO:0006221, GO:0016810, GO:0004088, GO:0016597, GO:0004087, GO:0006541, GO:0005951, GO:0006526, GO:0000050, GO:0004070, GO:0006207, GO:0045984, GO:0016743, GO:0005344, GO:0004151, GO:0003922
Pa_1_13150	GO:0008270, GO:0006508, GO:0004177
Pa_1_13160	GO:0005515, GO:0003824, GO:0006396, GO:0005783, GO:0005730, GO:0016702, GO:0006364, GO:0000480, GO:0000447, GO:0000472, GO:0030686, GO:0008047, GO:0003963
Pa_1_13170	GO:0005488
Pa_1_13190	GO:0005525, GO:0016787, GO:0005634, GO:0003677, GO:0008270, GO:0004091, GO:0080030, GO:0080032, GO:0080031, GO:0003990, GO:0004806, GO:0004771, GO:0016042, GO:0005576, GO:0016020, GO:0006351, GO:0016817, GO:0008203
Pa_1_13210	GO:0005829, GO:0005622, GO:0008270, GO:0016491, GO:0005515, GO:0055085, GO:0015031, GO:0005789, GO:0010181, GO:0030433, GO:0048471, GO:0051028, GO:0045892, GO:0031965, GO:0034098, GO:0000837, GO:0071629, GO:0072671
Pa_1_13220	GO:0016021, GO:0031207, GO:0006620
Pa_1_13230	GO:0003677, GO:0006260, GO:0005664
Pa_1_13240	GO:0005737, GO:0005829, GO:0016021, GO:0006508, GO:0005524, GO:0003676, GO:0006629, GO:0007126, GO:0035556, GO:0008026, GO:0008236, GO:0004386, GO:0004004, GO:0000139, GO:0003887, GO:0006417, GO:0005681, GO:0046540, GO:0005682, GO:0004629, GO:0005338, GO:0000393, GO:0000388, GO:2000765, GO:0009615, GO:0005351
Pa_1_13260	GO:0005829, GO:0005634, GO:0005515, GO:0005524, GO:0006260, GO:0017111, GO:0043596, GO:0006298, GO:0003887, GO:0006261, GO:0000790, GO:0000075, GO:0006272, GO:0007049, GO:0006974, GO:0005663, GO:0003689, GO:0031390, GO:0031391, GO:0031389, GO:0007062, GO:0006270, GO:0033314, GO:0000077, GO:0003993
Pa_1_13280	GO:0016881, GO:0004842
Pa_1_1330	GO:0016021, GO:0016020, GO:0046873, GO:0005385, GO:0019028, GO:0005198
Pa_1_13300	GO:0005737, GO:0016787, GO:0016021, GO:0000324, GO:0033554, GO:0005774
Pa_1_13310	GO:0005829, GO:0005634, GO:0005622, GO:0008270, GO:0003676, GO:0032153, GO:0051286, GO:0005739, GO:0007165, GO:0030435, GO:0009272, GO:0008360, GO:0007264, GO:0030428, GO:0005935, GO:0051666, GO:0030036, GO:0071937, GO:0005100
Pa_1_13320	GO:0005634, GO:0003677, GO:0008270, GO:0016021, GO:0003700, GO:0050662, GO:0005488, GO:0005515, GO:0005524, GO:0055085, GO:0005794, GO:0004674, GO:0005789, GO:0006355, GO:0044237, GO:0003854, GO:0006694, GO:0016853, GO:0000156, GO:0006696, GO:0047012, GO:0000252
Pa_1_13340	GO:0003677
Pa_1_13350	GO:0005737, GO:0005829, GO:0005634, GO:0003743, GO:0008270, GO:0005524, GO:0003676, GO:0005816, GO:0005739, GO:0003723, GO:0005730, GO:0008026, GO:0004386, GO:0000184, GO:0004004, GO:0006364, GO:0006397, GO:0008186, GO:0005681, GO:0045292, GO:0008380, GO:0000348, GO:0008972, GO:0009228
Pa_1_13360	GO:0005634, GO:0005622, GO:0008270, GO:0042710, GO:0003676, GO:0030447, GO:0006351, GO:0006882, GO:0000977, GO:0034225, GO:0033212
Pa_1_13370	GO:0005737, GO:0046872, GO:0005634, GO:0006508, GO:0004177, GO:0008237, GO:0008239
Pa_1_13380	GO:0005737, GO:0005829, GO:0005634, GO:0048037, GO:0005524, GO:0005975, GO:0016301, GO:0000036, GO:0031177, GO:0000103, GO:0004765, GO:0046316, GO:0019521, GO:0001906
Pa_1_13390	GO:0005634, GO:0003677, GO:0005840, GO:0003735, GO:0006412, GO:0048037, GO:0005759, GO:0005515, GO:0006096, GO:0005524, GO:0016746, GO:0004003, GO:0000002, GO:0006099, GO:0042645, GO:0043754, GO:0046949, GO:0004742, GO:0045254, GO:0006090, GO:0045252, GO:0004149, GO:0009353, GO:0006103, GO:0005967, GO:0006086, GO:0030523
Pa_1_1340	GO:0005634, GO:0003677, GO:0008270, GO:0016021, GO:0003700, GO:0022857, GO:0006351, GO:0006310, GO:0010508, GO:0006302
Pa_1_13400	GO:0005886, GO:0005743, GO:0046933, GO:0015986, GO:0006200, GO:0022904, GO:0033615, GO:0005753, GO:0045261, GO:0008144, GO:0042776, GO:0006119, GO:0016887
Pa_1_13410	GO:0016021, GO:0003824, GO:0030170, GO:0004872, GO:0015031, GO:0000139, GO:0006888, GO:0005801, GO:0005484, GO:0006906, GO:0005797, GO:0031201
Pa_1_13420	GO:0005840, GO:0003735, GO:0006412, GO:0009986, GO:0042254, GO:0030447, GO:0003723, GO:0005730, GO:0002181, GO:0022625, GO:0000027, GO:0005624
Pa_1_13430	GO:0005840, GO:0003735, GO:0006412, GO:0005730, GO:0022625
Pa_1_13440	GO:0016740, GO:0016021, GO:0005886, GO:0005515, GO:0016020, GO:0004579, GO:0008250, GO:0006487, GO:0006486, GO:0004576
Pa_1_13460	GO:0005737, GO:0005829, GO:0005634, GO:0005622, GO:0008270, GO:0016491, GO:0005515, GO:0005524, GO:0008168, GO:0004497, GO:0009055, GO:0020037, GO:0016705, GO:0032153, GO:0006281, GO:0016301, GO:0004674, GO:0007165, GO:0004672, GO:0031573, GO:0030448, GO:0005819, GO:0000075, GO:0000778, GO:0007094, GO:0034501, GO:0031134, GO:0070683, GO:0004713, GO:0007049, GO:0004712, GO:0004693, GO:0008104, GO:…
Pa_1_13470	GO:0005737, GO:0005634, GO:0003700, GO:0005886, GO:0006355, GO:0006351, GO:0043565, GO:0005935, GO:0006357, GO:0030014
Pa_1_13480	GO:0003824
Pa_1_13490	GO:0003824, GO:0005739, GO:0003723, GO:0005730, GO:0006364, GO:0032040, GO:0000480, GO:0000447, GO:0000472
Pa_1_1350	GO:0016787
Pa_1_13500	GO:0005829, GO:0005840, GO:0003735, GO:0006412, GO:0016021, GO:0016020, GO:0033554, GO:0005777, GO:0000139, GO:0031965, GO:0006450
Pa_1_13510	GO:0003998
Pa_1_13520	GO:0005840, GO:0003735, GO:0006412, GO:0005488, GO:0005886, GO:0005515, GO:0005524, GO:0007035, GO:0000329, GO:0046933, GO:0015991, GO:0015986, GO:0019843, GO:0006200, GO:0022904, GO:0046961, GO:0008553, GO:0000221, GO:0005753, GO:0045261, GO:0008144, GO:0042776, GO:0006119
Pa_1_13530	GO:0005524, GO:0006464, GO:0016020, GO:0016874, GO:0008641
Pa_1_13540	GO:0005634, GO:0005840, GO:0003735, GO:0006412, GO:0009055, GO:0005730, GO:0002181, GO:0045454, GO:0015035, GO:0022625, GO:0019843
Pa_1_13550	GO:0005829, GO:0005634, GO:0016021, GO:0055085, GO:0006886, GO:0005768, GO:0030447, GO:0004180, GO:0015031, GO:0030437, GO:0042147, GO:0045053, GO:0030904, GO:0007034, GO:0030906
Pa_1_13560	GO:0005488, GO:0005515, GO:0005524, GO:0006281, GO:0008094, GO:0000070, GO:0003684, GO:0051301, GO:0031965, GO:0016973, GO:0031080, GO:0031081
Pa_1_13570	GO:0005829, GO:0005634, GO:0003677, GO:0005524, GO:0006281, GO:0030435, GO:0042802, GO:0008094, GO:0006259, GO:0006310, GO:0000724, GO:0007131, GO:0000723, GO:0000722, GO:0005635, GO:0003684, GO:0000150, GO:0006311, GO:0000790, GO:0003697, GO:0051260, GO:0003690, GO:0030998, GO:0003691, GO:0033170, GO:0043047, GO:0007533, GO:0042138, GO:0000711, GO:0006312, GO:0042148, GO:0000794, GO:0030491, GO:…
Pa_1_13590	GO:0008270, GO:0005488
Pa_1_1360	GO:0016021, GO:0005524, GO:0055085, GO:0009055, GO:0020037, GO:0016705, GO:0006281, GO:0005783, GO:0006629, GO:0005215, GO:0030870, GO:0004435, GO:0035556, GO:0005887
Pa_1_13600	GO:0016787, GO:0005509, GO:0005102
Pa_1_13610	GO:0005737, GO:0005829, GO:0005634, GO:0005622, GO:0008270, GO:0003676, GO:0006457, GO:0006289, GO:0031072, GO:0051082, GO:0003684
Pa_1_13615	GO:0003676, GO:0000166
Pa_1_13620	GO:0046872, GO:0006725, GO:0016830, GO:0009346, GO:0008815
Pa_1_13630	GO:0016021, GO:0005515, GO:0016192, GO:0005783, GO:0000139, GO:0030173
Pa_1_13650	GO:0005524, GO:0003676, GO:0008026
Pa_1_13670	GO:0005737, GO:0005829, GO:0005515, GO:0005730, GO:0006364
Pa_1_13680	GO:0005634, GO:0005622, GO:0005524, GO:0003676, GO:0020037, GO:0003723, GO:0006810, GO:0006355, GO:0008026, GO:0004386, GO:0004004, GO:0006364, GO:0030686, GO:0043565, GO:0006397, GO:0008186, GO:0000390, GO:0005681, GO:0046540, GO:0005682, GO:0045292, GO:0010508, GO:0000350, GO:0071007, GO:0071021
Pa_1_13695	GO:0005634, GO:0006355
Pa_1_13700	GO:0003676, GO:0030529
Pa_1_13710	GO:0016021, GO:0003824, GO:0006886, GO:0016192, GO:0015031, GO:0000329, GO:0000139, GO:0006895
Pa_1_13720	GO:0005634, GO:0003677, GO:0006355
Pa_1_13730	GO:0005829, GO:0016301, GO:0007126, GO:0018112, GO:0034198, GO:0032006
Pa_1_13740	GO:0016301, GO:0016772, GO:0016773, GO:0004305
Pa_1_13750	GO:0005737, GO:0016491, GO:0005524, GO:0008483, GO:0005739, GO:0004047, GO:0006546, GO:0005960, GO:0019464, GO:0005694, GO:0051276
Pa_1_13760	GO:0005634, GO:0005622, GO:0005488, GO:0005515, GO:0006396, GO:0003682, GO:0006397, GO:0007049, GO:0000785, GO:0005681, GO:0045292, GO:0008380, GO:0071004, GO:0000398, GO:0006270, GO:0003688, GO:0071007, GO:0000974, GO:0071006, GO:0071008, GO:0000354
Pa_1_13770	GO:0003677, GO:0008270, GO:0003676, GO:0005739, GO:0003723, GO:0005730, GO:0030529, GO:0006364, GO:0032040, GO:0030686, GO:0005732, GO:0005681, GO:0046540, GO:0045292, GO:0000244, GO:0000387, GO:0030532, GO:0031428, GO:0000154
Pa_1_13780	GO:0005622, GO:0008270, GO:0003676
Pa_1_13790	GO:0005737, GO:0005622, GO:0005524, GO:0016301, GO:0008776, GO:0006082, GO:0016774
Pa_1_1380	GO:0016021
Pa_1_13800	GO:0005737, GO:0008776, GO:0006082
Pa_1_13820	GO:0016021, GO:0008643, GO:0022857, GO:0008080, GO:0055085, GO:0005783, GO:0005794, GO:0005215, GO:0005887, GO:0005315, GO:0005384, GO:0006797, GO:0048249
Pa_1_13830	GO:0005634, GO:0003677, GO:0008270, GO:0003700, GO:0005506, GO:0016491, GO:0016705, GO:0005975, GO:0007047, GO:0031418, GO:0006351, GO:0004650
Pa_1_13840	GO:0005488, GO:0016491, GO:0006406, GO:0000346
Pa_1_13850	GO:0005829, GO:0016021, GO:0006886, GO:0000139, GO:0007264, GO:0042147, GO:0005956, GO:0019887, GO:0032045
Pa_1_13870	GO:0016740, GO:0005737, GO:0016829, GO:0004364
Pa_1_13880	GO:0005634, GO:0003677, GO:0008270, GO:0016021, GO:0042493, GO:0005488, GO:0005515, GO:0055085, GO:0005816, GO:0016301, GO:0006355, GO:0007165, GO:0006351, GO:0005956, GO:0034456, GO:0006356, GO:0006359, GO:0006974, GO:0019887, GO:0006468, GO:0006383, GO:0032545, GO:0030291, GO:0045859
Pa_1_13890	GO:0016787, GO:0003824, GO:0016020, GO:0006715
Pa_1_1390	GO:0005737, GO:0005829, GO:0005634, GO:0006464, GO:0034599, GO:0008113, GO:0044267, GO:0019538, GO:0016671
Pa_1_13900	GO:0016740, GO:0005840, GO:0003735, GO:0006412, GO:0003723, GO:0002181, GO:0015934, GO:0005762, GO:0006631
Pa_1_13910	GO:0005737, GO:0005634, GO:0042493, GO:0000226, GO:0005816, GO:0030447, GO:0019901, GO:0000079, GO:0016301, GO:0007165, GO:0031137, GO:0051301, GO:0007067, GO:0007049, GO:0005935, GO:0000307, GO:0034613, GO:0010389, GO:0016538, GO:0070317, GO:0000086, GO:0007090, GO:0008315, GO:0030472, GO:0047485, GO:0000746, GO:2000045, GO:0007089, GO:0000084, GO:0000082, GO:0045740, GO:0006279
Pa_1_13920	GO:0016021, GO:0005886, GO:0005509, GO:0005789, GO:0030448, GO:0006950, GO:0005216, GO:0050850, GO:0009612, GO:0005887, GO:0005244, GO:0005891, GO:0005245, GO:0005262, GO:0032512, GO:0032516
Pa_1_13930	GO:0008270, GO:0016301, GO:0003899
Pa_1_13940	GO:0003677, GO:0047674
Pa_1_13950	GO:0016021, GO:0005524, GO:0006298, GO:0030983
Pa_1_13960	GO:0005737, GO:0005634, GO:0005515, GO:0005524, GO:0005739, GO:0000287, GO:0008094, GO:0007131, GO:0006298, GO:0043504, GO:0003684, GO:0030983, GO:0032300, GO:0032139, GO:0032137, GO:0000228, GO:0000404, GO:0043570, GO:0000710, GO:0032302, GO:0000406, GO:0000403, GO:0000735, GO:0003879, GO:0000105, GO:0032301, GO:0032135, GO:0004020, GO:0000103, GO:0045143, GO:0000795, GO:0051026
Pa_1_13980	GO:0005737, GO:0005634, GO:0003676, GO:0003723, GO:0030529, GO:0006364, GO:0008033, GO:0006397, GO:0008380
Pa_1_13990	GO:0008168
Pa_1_140	GO:0005634, GO:0003677, GO:0016829, GO:0006281, GO:0005739, GO:0000166, GO:0003729, GO:0003913, GO:0003904, GO:0018298, GO:0000719
Pa_1_1400	GO:0050660, GO:0008762, GO:0003677, GO:0008270, GO:0016021, GO:0005524, GO:0055085, GO:0004674, GO:0016772, GO:0004672, GO:0015074
Pa_1_14000	GO:0005737, GO:0006950
Pa_1_14010	GO:0003676, GO:0000166
Pa_1_14020	GO:0005737, GO:0005829, GO:0005634, GO:0005789, GO:0007346, GO:0005839, GO:0004298, GO:0051603, GO:0000502, GO:0019774, GO:0034515, GO:0043161, GO:0010499
Pa_1_14030	GO:0005737, GO:0005829, GO:0005634, GO:0005488, GO:0005886, GO:0005515, GO:0005524, GO:0016192, GO:0005739, GO:0005794, GO:0031321, GO:0005802, GO:0016773, GO:0006661, GO:0034613, GO:0030036, GO:0030476, GO:0006646, GO:0007033, GO:0004428, GO:0046854, GO:0048015, GO:0004430, GO:0005942, GO:0016303
Pa_1_14040	GO:0016021, GO:0050662, GO:0003824, GO:0044237, GO:0008324
Pa_1_14060	GO:0005737, GO:0005634, GO:0005975, GO:0005529, GO:0004746, GO:0009231, GO:0009349, GO:0000906
Pa_1_14070	GO:0005634, GO:0005524, GO:0016020, GO:0016887, GO:0007131, GO:0006298, GO:0030983, GO:0000228, GO:0043570, GO:0032389
Pa_1_14090	GO:0016021, GO:0006629, GO:0006810, GO:0004435, GO:0035556, GO:0000139
Pa_1_1410	GO:0005524, GO:0004674, GO:0004672
Pa_1_14120	GO:0005829, GO:0005634, GO:0005515, GO:0071775, GO:0007165, GO:0008360, GO:0005819, GO:0006417, GO:0007094, GO:0051301, GO:0007015, GO:0007049, GO:0005935, GO:0007124, GO:0006470, GO:0004721, GO:0005934, GO:2000765, GO:0000159, GO:0008601, GO:0034260, GO:0031030, GO:2000769, GO:0032995, GO:0034047, GO:0007117, GO:0001100
Pa_1_14130	GO:0005515, GO:0000166, GO:0003899, GO:0000920, GO:0016591
Pa_1_14150	GO:0003677, GO:0005622, GO:0006281, GO:0003723, GO:0005730, GO:0006810, GO:0015934, GO:0005934, GO:0000900, GO:0042273, GO:0003730, GO:2000766, GO:0005086, GO:0032012
Pa_1_14160	GO:0005829, GO:0005634, GO:0003743, GO:0030447, GO:0016301
Pa_1_14170	GO:0008270, GO:0016021, GO:0005488, GO:0008168, GO:0003676, GO:0016811, GO:0070403, GO:0006342, GO:0006476, GO:0005730, GO:0042802
Pa_1_14190	GO:0006066, GO:0004026
Pa_1_1420	GO:0005524, GO:0004674, GO:0004672
Pa_1_14200	GO:0006066, GO:0004026
Pa_1_14210	GO:0005634, GO:0005488, GO:0005515, GO:0006886, GO:0006914, GO:0015031, GO:0032258, GO:0000723, GO:0008565, GO:0005774, GO:0000139, GO:0030242, GO:0031142, GO:0019898, GO:0000407, GO:0034497, GO:0048280
Pa_1_14220	GO:0005634, GO:0051301, GO:0000777, GO:0007059, GO:0043515
Pa_1_14230	GO:0005829, GO:0005634, GO:0003677, GO:0005515, GO:0006281, GO:0016301, GO:0006355, GO:0006351, GO:0006298, GO:0051123, GO:0043565, GO:0000790, GO:0006338, GO:0006359, GO:0006366, GO:0006334, GO:0045944, GO:0031491, GO:0005694, GO:0008301, GO:0070898, GO:0034724
Pa_1_14250	GO:0005737, GO:0046872, GO:0005829, GO:0005634, GO:0005622, GO:0003676, GO:0005975, GO:0000287, GO:0005992, GO:0004527, GO:0006006, GO:0016868, GO:0004614, GO:0019388, GO:0019255, GO:0005978, GO:0006874, GO:0006011, GO:0051156
Pa_1_14260	GO:0005829, GO:0005634, GO:0003677, GO:0005622, GO:0016021, GO:0003676, GO:0009055, GO:0020037, GO:0005975, GO:0005739, GO:0000287, GO:0016712, GO:0006355, GO:0006364, GO:0004527, GO:0000175, GO:0000002, GO:0016868, GO:0034475, GO:0008408
Pa_1_14270	GO:0005488, GO:0016491
Pa_1_14280	GO:0005829, GO:0005634, GO:0005625, GO:0032153, GO:0005783, GO:0033554, GO:0045324, GO:0006520, GO:0000139, GO:0016126, GO:0006696, GO:0000300, GO:0019898, GO:0015485, GO:0008142, GO:0070300, GO:0005546, GO:0070273, GO:0015248, GO:0010922, GO:0006869, GO:0032541, GO:0031234, GO:0043325, GO:0080025, GO:0010314, GO:0055092, GO:0016125, GO:0008289
Pa_1_14290	GO:0016491, GO:0004221, GO:0006511, GO:0008234
Pa_1_1430	GO:0016787, GO:0005829, GO:0005488, GO:0005524, GO:0016301, GO:0004788, GO:0070624, GO:0009229, GO:0006772
Pa_1_14310	GO:0005622, GO:0008270, GO:0003676, GO:0055085, GO:0000166, GO:0006813
Pa_1_14320	GO:0005737, GO:0005829, GO:0005634, GO:0003677, GO:0008270, GO:0005515, GO:0005524, GO:0006281, GO:0016020, GO:0005739, GO:0000155, GO:0005730, GO:0006355, GO:0006351, GO:0006289, GO:0008094, GO:0008026, GO:0009650, GO:0004386, GO:0000403, GO:0000400, GO:0006301, GO:0000790, GO:0006338, GO:0034644, GO:0016585, GO:0009378, GO:0004842, GO:0006302, GO:0007533, GO:0032183, GO:0006333, GO:0000113, GO:…
Pa_1_14330	GO:0003677, GO:0008270, GO:0016021, GO:0005524, GO:0003824, GO:0017111, GO:0004386, GO:0004528, GO:0004551, GO:0047429, GO:0009141, GO:0016036
Pa_1_14340	GO:0008080
Pa_1_14350	GO:0005634, GO:0005840, GO:0003735, GO:0006412, GO:0003723, GO:0002181, GO:0022625
Pa_1_14360	GO:0005737, GO:0016787, GO:0005829, GO:0005634, GO:0003677, GO:0005625, GO:0009986, GO:0015031, GO:0006355, GO:0006351, GO:0051082, GO:0015986, GO:0070300, GO:0070273, GO:0080025, GO:0000276, GO:0015078, GO:0005854, GO:0042788, GO:0051083, GO:0032266
Pa_1_14370	GO:0016787, GO:0016021, GO:0005886, GO:0015986, GO:0006461, GO:0006200, GO:0022904, GO:0005198, GO:0005753, GO:0042776, GO:0000276, GO:0015078, GO:0000274, GO:0043623, GO:0006119, GO:0016887
Pa_1_14380	GO:0016021, GO:0005743, GO:0031966, GO:0033617
Pa_1_1440	GO:0003677, GO:0008270, GO:0016021, GO:0005524, GO:0020037, GO:0008061, GO:0005529, GO:0004872, GO:0016798, GO:0004601, GO:0004386, GO:0004338, GO:0006979, GO:0050832, GO:0031640
Pa_1_14400	GO:0016787, GO:0005576, GO:0004553, GO:0005975, GO:0043169, GO:0007165, GO:0000272, GO:0005102, GO:0004565
Pa_1_14410	GO:0016787, GO:0016491, GO:0030170, GO:0008483, GO:0016805, GO:0016810
Pa_1_14430	GO:0050660, GO:0016491, GO:0005739, GO:0006629, GO:0016614
Pa_1_14450	GO:0005829, GO:0005634, GO:0005488, GO:0005886, GO:0005515, GO:0032153, GO:0051286, GO:0005816, GO:0000131, GO:0031505, GO:0005739, GO:0016301, GO:0006970, GO:0005507, GO:0000910, GO:0005935, GO:0071470, GO:0034613, GO:0008047, GO:0034221, GO:0006038, GO:0043461, GO:0008131, GO:0048038, GO:0009308, GO:0071937, GO:0009967, GO:0000148, GO:0000935, GO:0090093
Pa_1_14460	GO:0016021, GO:0005743
Pa_1_14470	GO:0005737, GO:0005829, GO:0005634, GO:0015031, GO:0006355, GO:0006351, GO:0051082, GO:0005854, GO:0042788, GO:0051083, GO:0006613
Pa_1_14480	GO:0046872, GO:0005829, GO:0005634, GO:0003723, GO:0006396, GO:0004000, GO:0008251, GO:0006400, GO:0043829
Pa_1_14490	GO:0005840, GO:0003735, GO:0006412, GO:0003723, GO:0002181, GO:0022625
Pa_1_1450	GO:0005634, GO:0051287, GO:0016616, GO:0048037, GO:0008168, GO:0008465, GO:0004617, GO:0006564
Pa_1_14500	GO:0051920, GO:0016491, GO:0005625, GO:0030446, GO:0005777, GO:0004601, GO:0006950
Pa_1_14510	GO:0004871
Pa_1_14520	GO:0005737, GO:0005829, GO:0005634, GO:0006508, GO:0005524, GO:0004177, GO:0008239, GO:0004594, GO:0015937
Pa_1_14530	GO:0005886, GO:0005739, GO:0006950
Pa_1_14540	GO:0006810, GO:0005743, GO:0022900, GO:0005747, GO:0008137, GO:0006120, GO:0070469, GO:0044238
Pa_1_14550	GO:0046872, GO:0016787, GO:0005634, GO:0003677, GO:0008270, GO:0003700, GO:0006508, GO:0004177, GO:0009987, GO:0008235, GO:0006629, GO:0035556, GO:0004629, GO:0018775
Pa_1_14560	GO:0016787, GO:0005829, GO:0050660, GO:0016021, GO:0005506, GO:0016491, GO:0009055, GO:0003723, GO:0006396, GO:0005730, GO:0070478, GO:0004527, GO:0000177, GO:0000176, GO:0000175, GO:0000467, GO:0070651, GO:0071042, GO:0071035, GO:0071038, GO:0070481
Pa_1_14570	GO:0016740, GO:0005829, GO:0005634, GO:0005886, GO:0006886, GO:0016020, GO:0005096, GO:0006888, GO:0005968, GO:0017137, GO:0032858, GO:0018344, GO:0006612
Pa_1_14580	GO:0005737, GO:0051287, GO:0016021, GO:0055085, GO:0008233, GO:0009279, GO:0000228, GO:0006526, GO:0003991, GO:0003942
Pa_1_14590	GO:0006096, GO:0005524, GO:0005945, GO:0003872
Pa_1_1460	GO:0005634, GO:0051287, GO:0008270, GO:0003700, GO:0005488, GO:0016491, GO:0000105, GO:0004399, GO:0004635, GO:0004636
Pa_1_14600	GO:0005840, GO:0003735, GO:0006412
Pa_1_14610	GO:0005840, GO:0003735, GO:0006412
Pa_1_14620	GO:0005737, GO:0046872, GO:0005739, GO:0051539, GO:0016992, GO:0009249
Pa_1_14625	GO:0016021, GO:0016192, GO:0032153, GO:0005768, GO:0004872, GO:0005783, GO:0005794, GO:0005802, GO:0005484, GO:0006906, GO:0006897, GO:0033205, GO:0006887, GO:0006893, GO:0051285, GO:0030659, GO:0030658
Pa_1_14630	GO:0016740, GO:0005737, GO:0051287, GO:0005759, GO:0005524, GO:0005739, GO:0006396, GO:0016301, GO:0006355, GO:0006520, GO:0016620, GO:0006526, GO:0003991, GO:0003942, GO:0046983, GO:0006592, GO:0008652
Pa_1_14640	GO:0005737, GO:0005634, GO:0004553, GO:0005975, GO:0016763, GO:0004514, GO:0009435, GO:0034354
Pa_1_14660	GO:0016740, GO:0005737, GO:0051287, GO:0003824, GO:0006396, GO:0006526, GO:0003963, GO:0003942, GO:0004437
Pa_1_14670	GO:0016787, GO:0008270, GO:0016021, GO:0005488, GO:0003824, GO:0005739, GO:0016874, GO:0005741
Pa_1_14680	GO:0016740, GO:0005829, GO:0005634, GO:0005488, GO:0016491, GO:0009060, GO:0004303, GO:0004316, GO:0009107
Pa_1_1470	GO:0005525, GO:0005829, GO:0005634, GO:0005622, GO:0042493, GO:0001950, GO:0005886, GO:0005515, GO:0005524, GO:0006886, GO:0005768, GO:0000131, GO:0031505, GO:0010008, GO:0031321, GO:0033554, GO:0006914, GO:0015031, GO:0005789, GO:0006355, GO:0003924, GO:0000139, GO:0007264, GO:0006888, GO:0009306, GO:0005741, GO:0042144, GO:0006906, GO:0007121, GO:0033205, GO:0006887, GO:0006893, GO:0070317, GO:…
Pa_1_14700	GO:0016740, GO:0005829, GO:0005622, GO:0048037, GO:0003824, GO:0016788, GO:0000036, GO:0031177, GO:0009058, GO:0016874, GO:0006631, GO:0005097, GO:0004467, GO:0005778, GO:0047077
Pa_1_14710	GO:0016740, GO:0005829, GO:0005634, GO:0016021, GO:0005515, GO:0016757, GO:0005794, GO:0005789, GO:0000139, GO:0006487, GO:0000136, GO:0000009, GO:0000032, GO:0006491, GO:0006080, GO:0033164, GO:0000137
Pa_1_14730	GO:0016787, GO:0005622, GO:0008270, GO:0005488, GO:0005524, GO:0003676, GO:0016757, GO:0004672
Pa_1_14740	GO:0072546, GO:0034975
Pa_1_14760	GO:0005737, GO:0016787, GO:0005829, GO:0005634, GO:0005524, GO:0003676, GO:0003723, GO:0004812, GO:0006418, GO:0004815, GO:0006422, GO:0004816, GO:0006421
Pa_1_14770	GO:0005737, GO:0005524, GO:0004812, GO:0006418, GO:0035091, GO:0007154
Pa_1_14780	GO:0005737, GO:0005524, GO:0004812, GO:0006418
Pa_1_14790	GO:0046872, GO:0005840, GO:0003735, GO:0006412, GO:0042254, GO:0022627, GO:0002181, GO:0000462, GO:0000028, GO:0000479
Pa_1_1480	GO:0016787, GO:0042493, GO:0005576, GO:0003824, GO:0004553, GO:0005975, GO:0043169, GO:0016052, GO:0000272, GO:0004567, GO:0046355
Pa_1_14800	GO:0005737, GO:0055085, GO:0016020, GO:0006457, GO:0005215, GO:0003779, GO:0045944, GO:0031683, GO:0009968, GO:0007329
Pa_1_14810	GO:0005737, GO:0005622, GO:0008270, GO:0005488, GO:0006508, GO:0005886, GO:0005515, GO:0003676, GO:0005739, GO:0043130, GO:0007126, GO:0004197, GO:0031137, GO:0000329, GO:0005624, GO:0031931, GO:0031929, GO:0009267
Pa_1_14820	GO:0005488
Pa_1_14840	GO:0016021
Pa_1_14850	GO:0016021, GO:0005515, GO:0015031, GO:0005789, GO:0030173, GO:0006888, GO:0070317, GO:0030134
Pa_1_14860	GO:0005525, GO:0005829, GO:0005634, GO:0005515, GO:0004872, GO:0005509, GO:0005783, GO:0017111, GO:0048500, GO:0008312, GO:0006614, GO:0005786, GO:0003924, GO:0005096, GO:0005048, GO:0006617, GO:0005785, GO:0005047
Pa_1_14870	GO:0005829, GO:0005634, GO:0003677, GO:0008270, GO:0005488, GO:0005515, GO:0005524, GO:0006260, GO:0006886, GO:0016192, GO:0006281, GO:0005739, GO:0016301, GO:0004674, GO:0007126, GO:0006511, GO:0031573, GO:0007131, GO:0000723, GO:0000722, GO:0008565, GO:0016773, GO:0000228, GO:0007049, GO:0031932, GO:0031929, GO:0071470, GO:0031142, GO:0000781, GO:0000077, GO:0048015, GO:0016303, GO:0016568, GO:…
Pa_1_14880	GO:0003677, GO:0008270, GO:0004674, GO:0016881
Pa_1_1490	GO:0005829, GO:0008270, GO:0016491, GO:0004022, GO:0005625, GO:0030446, GO:0005524, GO:0033554, GO:0000166, GO:0046526, GO:0042732, GO:0017111, GO:0015986, GO:0000276, GO:0015078, GO:0003939, GO:0019318, GO:0005999, GO:0019407, GO:0050019
Pa_1_14900	GO:0000287, GO:0006357, GO:0016791, GO:0016592, GO:0001104, GO:0009117
Pa_1_14910	GO:0046872, GO:0005515, GO:0006096, GO:0005524, GO:0005739, GO:0016301, GO:0003729, GO:0005945, GO:0003872, GO:0070095, GO:0015992
Pa_1_14920	GO:0016021, GO:0022891, GO:0008168
Pa_1_14960	GO:0005634, GO:0008270, GO:0003700
Pa_1_14970	GO:0005737, GO:0003676, GO:0003723, GO:0007126, GO:0000166, GO:0006397, GO:0007049, GO:0001403, GO:0007124, GO:0008380, GO:0032995, GO:0032955, GO:0008361, GO:0051220
Pa_1_14980	GO:0003677, GO:0005488, GO:0016491, GO:0006310, GO:0015074
Pa_1_14990	GO:0005737, GO:0005829, GO:0005634, GO:0051287, GO:0001950, GO:0050661, GO:0009097, GO:0009086, GO:0003942, GO:0046983, GO:0008652, GO:0004073, GO:0009089, GO:0009088, GO:0019877
Pa_1_1500	GO:0006730, GO:0005829, GO:0005634, GO:0016491, GO:0005524, GO:0005739, GO:0004326, GO:0042578
Pa_1_15000	GO:0046872, GO:0005829, GO:0005622, GO:0008270, GO:0005515, GO:0032153, GO:0035556, GO:0007165, GO:0005096, GO:0035091, GO:0007264, GO:0051056, GO:0030479, GO:0043332, GO:0030036, GO:0001101, GO:0005100, GO:0005546, GO:0070273, GO:0080025, GO:0010314, GO:0032266, GO:0060258, GO:0005933, GO:0007231, GO:0005085
Pa_1_15010	GO:0016021, GO:0016491, GO:0055114, GO:0005249, GO:0016117, GO:0015995, GO:0015979, GO:0016166, GO:0016120, GO:0008076
Pa_1_15020	GO:0005634, GO:0000166, GO:0016846, GO:0006289, GO:0003684, GO:0003993, GO:0016291, GO:0006637, GO:0047617
Pa_1_15030	GO:0005829, GO:0003677, GO:0016021, GO:0005886, GO:0005515, GO:0006260, GO:0030447, GO:0005783, GO:0033554, GO:0006810, GO:0000139, GO:0003887, GO:0005935, GO:0001403, GO:0007124, GO:0005545, GO:0006897, GO:0006887, GO:0043461, GO:0008142, GO:0015248, GO:0010922, GO:0032541, GO:0008289, GO:0005769, GO:0000138, GO:0005640, GO:0015918, GO:0000742
Pa_1_15050	GO:0008270, GO:0003676
Pa_1_15060	GO:0005829, GO:0005634, GO:0005524, GO:0016192, GO:0000131, GO:0005739, GO:0003984, GO:0004674, GO:0015031, GO:0051258, GO:0007165, GO:0003779, GO:0030448, GO:0008298, GO:0051028, GO:0007264, GO:0051056, GO:0005826, GO:0005516, GO:0071520, GO:0000142, GO:0000915, GO:0007049, GO:0007163, GO:0005935, GO:0030479, GO:0016597, GO:0005934, GO:0043332, GO:0034613, GO:0031097, GO:0030036, GO:0000916, GO:…
Pa_1_15080	GO:0005737, GO:0005829, GO:0005634, GO:0005488, GO:0009986, GO:0005515, GO:0003755, GO:0006457, GO:0005794, GO:0016788, GO:0005788, GO:0000151, GO:0004842, GO:0042277, GO:0019478
Pa_1_15090	GO:0004526, GO:0001682
Pa_1_1510	GO:0005737, GO:0006730, GO:0005829, GO:0005634, GO:0016491, GO:0005524, GO:0005739, GO:0004326, GO:0042578, GO:0008841
Pa_1_15100	GO:0016740, GO:0008080, GO:0005576, GO:0030248, GO:0004553, GO:0005975
Pa_1_15110	GO:0005737, GO:0005829, GO:0005634, GO:0003677, GO:0008270, GO:0016491, GO:0001950, GO:0006096, GO:0005524, GO:0006281, GO:0005739, GO:0016301, GO:0030437, GO:0006355, GO:0001302, GO:0016773, GO:0006013, GO:0009051, GO:0045944, GO:0008361, GO:0004396, GO:0004340, GO:0008865, GO:0019158, GO:0006002, GO:0032445, GO:0006000, GO:0046015
Pa_1_15130	GO:0005488, GO:0005524, GO:0004674, GO:0000902
Pa_1_15140	GO:0004553, GO:0005975, GO:0043169
Pa_1_15150	GO:0005634, GO:0008270, GO:0003700, GO:0016301
Pa_1_15160	GO:0005829, GO:0005634, GO:0003677, GO:0008270, GO:0003700, GO:0003676, GO:0006351, GO:0042797, GO:0003899, GO:0005666, GO:0006386, GO:0006384, GO:0042779
Pa_1_15170	GO:0006355, GO:0016592, GO:0001104
Pa_1_15180	GO:0016021, GO:0004190
Pa_1_15190	GO:0000287, GO:0008897, GO:0009059
Pa_1_15210	GO:0005576, GO:0030248, GO:0004553, GO:0005975, GO:0016788, GO:0006629
Pa_1_15220	GO:0005737, GO:0009116, GO:0008270, GO:0005524, GO:0003676, GO:0003723, GO:0003964, GO:0006278, GO:0004820, GO:0006426
Pa_1_15235	GO:0016021, GO:0005524, GO:0042626, GO:0016772, GO:0004713, GO:0008910
Pa_1_15240	GO:0016740, GO:0016021, GO:0009058, GO:0017176, GO:0006506, GO:0016765, GO:0016117, GO:0016767, GO:0016872, GO:0045436, GO:0046905
Pa_1_15260	GO:0005634, GO:0003677, GO:0016829, GO:0006281, GO:0005739, GO:0000166, GO:0003729, GO:0003913, GO:0003904, GO:0018298, GO:0000719
Pa_1_15270	GO:0004091, GO:0005576, GO:0009405, GO:0044275, GO:0050525
Pa_1_15290	GO:0009116, GO:0003677, GO:0006508, GO:0003824, GO:0006281, GO:0005975, GO:0043169, GO:0003723, GO:0030246, GO:0004190, GO:0003964, GO:0006278, GO:0003908, GO:0004565, GO:0009341
Pa_1_1530	GO:0005886, GO:0031305, GO:0042407
Pa_1_15300	GO:0016787
Pa_1_15310	GO:0003677, GO:0006508, GO:0005524, GO:0005618, GO:0016020, GO:0004252, GO:0015074
Pa_1_15320	GO:0005829, GO:0005634, GO:0005515, GO:0005524, GO:0030447, GO:0031505, GO:0004674, GO:0006995, GO:0007165, GO:0030435, GO:0004672, GO:0007346, GO:0031098, GO:0008360, GO:0051301, GO:0007067, GO:0004713, GO:0046685, GO:0030428, GO:0007015, GO:0032005, GO:0030242, GO:0051519, GO:0000165, GO:0005935, GO:0071470, GO:0005934, GO:0070314, GO:0051403, GO:0033205, GO:0034605, GO:0006883, GO:0050850, GO:…
Pa_1_15330	GO:0016021, GO:0055085, GO:0005783, GO:0016773, GO:0030904, GO:0007034
Pa_1_15340	GO:0005737, GO:0005829, GO:0005634, GO:0016491, GO:0006464, GO:0010181, GO:0009107, GO:0004733, GO:0016415
Pa_1_15350	GO:0016884, GO:0005737, GO:0046872, GO:0016787, GO:0005829, GO:0003677, GO:0008270, GO:0016491, GO:0005515, GO:0005524, GO:0016829, GO:0009405, GO:0003755, GO:0006457, GO:0006355, GO:0006094, GO:0004075, GO:0004485, GO:0004039, GO:0004847, GO:0071469, GO:0019740, GO:0043419, GO:0004736, GO:0006525, GO:0000256
Pa_1_15360	GO:0031505, GO:0006897, GO:0005887, GO:0032126, GO:0045121, GO:0030866, GO:0032185
Pa_1_15370	GO:0005829, GO:0005634, GO:0005622, GO:0042493, GO:0005488, GO:0008168, GO:0016829, GO:0006779, GO:0055114, GO:0000103, GO:0009086, GO:0004851, GO:0019354, GO:0043115, GO:0051266
Pa_1_15380	GO:0005525, GO:0005829, GO:0005634, GO:0005622, GO:0042493, GO:0001950, GO:0005886, GO:0005515, GO:0000226, GO:0032153, GO:0051286, GO:0060237, GO:0032889, GO:0016020, GO:0000131, GO:0031505, GO:0010008, GO:0005794, GO:0007017, GO:0003924, GO:0030448, GO:0008360, GO:0051301, GO:0005624, GO:0007264, GO:0005741, GO:0007015, GO:0007049, GO:0007163, GO:0005935, GO:0005934, GO:0043332, GO:0007266, GO:…
Pa_1_15390	GO:0005737, GO:0006397, GO:0005681, GO:0045292, GO:0008380
Pa_1_1540	GO:0005737, GO:0005525, GO:0016787, GO:0005829, GO:0005634, GO:0005886, GO:0005515, GO:0005524, GO:0005509, GO:0009405, GO:0006623, GO:0006457, GO:0005783, GO:0010008, GO:0015031, GO:0003924, GO:0007264, GO:0005741, GO:0006897, GO:0070314, GO:0000011, GO:0005770, GO:0033157, GO:0031338, GO:0007038
Pa_1_15400	GO:0005737, GO:0005829, GO:0016021, GO:0005488, GO:0055085, GO:0006974, GO:0008180, GO:0010388
Pa_1_15410	GO:0016787, GO:0008270, GO:0005488, GO:0003676, GO:0005871, GO:0003777
Pa_1_15420	GO:0005737, GO:0006464, GO:0003824, GO:0016874, GO:0010181, GO:0009107, GO:0004733, GO:0016415, GO:0033819
Pa_1_15430	GO:0005737, GO:0005634, GO:0005840, GO:0003735, GO:0006412, GO:0016021, GO:0008168, GO:0009055, GO:0015940, GO:0045454, GO:0015035, GO:0006662, GO:0005507, GO:0008535, GO:0006333, GO:0003864, GO:0005763, GO:0032543, GO:0031304
Pa_1_15440	GO:0005829, GO:0005634, GO:0005840, GO:0006412, GO:0008168, GO:0009055, GO:0006810, GO:0045454, GO:0015035, GO:0006662, GO:0022900, GO:0071448
Pa_1_15450	GO:0005737, GO:0005524, GO:0006260, GO:0016052, GO:0005663, GO:0003689, GO:0004139, GO:0009264
Pa_1_15470	GO:0016491, GO:0005576, GO:0030245, GO:0008061, GO:0005507, GO:0052716, GO:0008471, GO:0046274, GO:0042438, GO:0043245
Pa_1_15480	GO:0016021, GO:0005886, GO:0031966
Pa_1_15490	GO:0005829, GO:0005634, GO:0003677, GO:0016705, GO:0032153, GO:0051286, GO:0005816, GO:0005783
Pa_1_15495	GO:0005622, GO:0008270
Pa_1_1550	GO:0005515, GO:0005524, GO:0016192, GO:0005739, GO:0015031, GO:0005789, GO:0004519, GO:0000139, GO:0030173, GO:0005741, GO:0030479, GO:0006897, GO:0043332, GO:0004527, GO:0006887, GO:0004437, GO:0004326, GO:0042578, GO:0030176, GO:0035339, GO:0043813, GO:0004438, GO:0043812, GO:0046856, GO:0042598, GO:0004439, GO:0052659, GO:0052658, GO:0004445
Pa_1_15510	GO:0050660, GO:0016021, GO:0005506, GO:0016491, GO:0003676, GO:0009055, GO:0000293
Pa_1_15520	GO:0046872, GO:0004022
Pa_1_15560	GO:0016740, GO:0005737, GO:0016829, GO:0016301, GO:0004364
Pa_1_15580	GO:0005737, GO:0005829, GO:0005634, GO:0008270, GO:0005515, GO:0008168, GO:0003676, GO:0006281, GO:0016811, GO:0070403, GO:0006342, GO:0006476, GO:0043130, GO:0030435, GO:0006351, GO:0042802, GO:0030702, GO:0045950, GO:0001302, GO:0000070, GO:0030466, GO:0045910, GO:0000790, GO:0006338, GO:0006348, GO:0008092, GO:0001300, GO:0031934, GO:0060303, GO:0016585, GO:0000183, GO:0017136, GO:0003714, GO:…
Pa_1_1560	GO:0016020
Pa_1_15610	GO:0005634, GO:0009116, GO:0008270, GO:0003700, GO:0005524, GO:0003824, GO:0004674, GO:0015969
Pa_1_15620	GO:0016021, GO:0005886, GO:0055085, GO:0005215
Pa_1_15640	GO:0016787
Pa_1_1565	GO:0031072
Pa_1_15650	GO:0046872, GO:0016787, GO:0005829, GO:0005634, GO:0005488, GO:0005739, GO:0047631, GO:0019693
Pa_1_15660	GO:0016021, GO:0005488, GO:0016491, GO:0005524, GO:0008152, GO:0055085, GO:0042626, GO:0005215, GO:0005681, GO:0000398
Pa_1_15690	GO:0016740, GO:0005737, GO:0005829, GO:0016021, GO:0005739, GO:0017000, GO:0019344, GO:0009086, GO:0004414, GO:0016413, GO:0033813, GO:0009092
Pa_1_1570	GO:0005737, GO:0005524, GO:0004822, GO:0006428
Pa_1_15710	GO:0005737, GO:0046872, GO:0005829, GO:0005634, GO:0005524, GO:0016779, GO:0003723, GO:0006397, GO:0051301, GO:0007067, GO:0033314, GO:0003730, GO:0004652, GO:0050265, GO:0071076, GO:0043631
Pa_1_15720	GO:0016491, GO:0016209
Pa_1_15750	GO:0005737, GO:0005524, GO:0003676, GO:0004812, GO:0004813, GO:0006419, GO:0016876, GO:0043039
Pa_1_15760	GO:0008168
Pa_1_15770	GO:0016021, GO:0005783, GO:0016125, GO:0047750
Pa_1_15780	GO:0016021, GO:0006810, GO:0000139
Pa_1_15785	GO:0005488, GO:0016491, GO:0005524, GO:0004316, GO:0004326
Pa_1_1580	GO:0005737, GO:0005634, GO:0005515, GO:0005524, GO:0005816, GO:0030447, GO:0016020, GO:0005739, GO:0000155, GO:0005874, GO:0005871, GO:0003777, GO:0005819, GO:0000778, GO:0051301, GO:0007067, GO:0007018, GO:0005828, GO:0030472, GO:0005875, GO:0005876, GO:0008574, GO:0051306, GO:0090307, GO:0005200, GO:0007019, GO:0000092, GO:0030541, GO:0000073, GO:0007052, GO:0000235, GO:0008569
Pa_1_15800	GO:0016787, GO:0006096, GO:0003824, GO:0042645, GO:0009166, GO:0005967, GO:0006086, GO:0004739, GO:0003863, GO:0045333
Pa_1_15810	GO:0005634, GO:0005622, GO:0008270, GO:0042493, GO:0005886, GO:0008168, GO:0005783, GO:0006694, GO:0016126, GO:0005741, GO:0006696, GO:0005811, GO:0090002, GO:0003838, GO:0071210
Pa_1_15820	GO:0008270, GO:0005515, GO:0003676, GO:0003723, GO:0000166, GO:0006397, GO:0005681, GO:0045292, GO:0008380
Pa_1_15830	GO:0005759
Pa_1_15840	GO:0005829, GO:0003677, GO:0005840, GO:0003824, GO:0005739, GO:0006457, GO:0005730, GO:0006355, GO:0031072, GO:0051082, GO:0005844, GO:0006364, GO:0000054, GO:0006450
Pa_1_15850	GO:0046872, GO:0016021, GO:0003700, GO:0016491, GO:0006508, GO:0004497, GO:0004190, GO:0015171, GO:0043565, GO:0004503, GO:0004097
Pa_1_15860	GO:0003824
Pa_1_15870	GO:0005737, GO:0005829, GO:0005634, GO:0050660, GO:0042493, GO:0005515, GO:0005524, GO:0032153, GO:0005816, GO:0016301, GO:0004674, GO:0016614, GO:0004672, GO:0030288, GO:0007346, GO:0015035, GO:0051301, GO:0007067, GO:0004713, GO:0008324, GO:0007243, GO:0008361, GO:0048024, GO:0030003, GO:0006376, GO:0042307
Pa_1_15880	GO:0005634, GO:0003677, GO:0005515, GO:0005730, GO:0006355, GO:0006351, GO:0005819, GO:0003746, GO:0006368, GO:0008023
Pa_1_15890	GO:0016021, GO:0015031, GO:0051028
Pa_1_1590	GO:0016787, GO:0003824, GO:0030170, GO:0016888, GO:0009088, GO:0019120, GO:0018784, GO:0004795
Pa_1_15900	GO:0005634, GO:0003677, GO:0008270, GO:0016021, GO:0003700, GO:0048315, GO:0030435, GO:0006351, GO:0042128
Pa_1_15910	GO:0003677, GO:0005622, GO:0008270
Pa_1_15920	GO:0050660, GO:0003677, GO:0006281, GO:0008812, GO:0006066, GO:0046562, GO:0016614, GO:0047682, GO:0000166, GO:0033718, GO:0050288
Pa_1_15940	GO:0016787, GO:0016021, GO:0005886, GO:0003824, GO:0004553, GO:0005975, GO:0007047, GO:0043169, GO:0042973, GO:0004338, GO:0000272, GO:0009251
Pa_1_15960	GO:0004852, GO:0033014
Pa_1_15990	GO:0005634, GO:0008270, GO:0003700, GO:0003824
Pa_1_1600	GO:0004872, GO:0006626, GO:0005741
Pa_1_16000	GO:0005634, GO:0008270, GO:0003700, GO:0009103, GO:0045735, GO:0016853, GO:0046564, GO:0050162, GO:0008830
Pa_1_16010	GO:0003677, GO:0005524, GO:0017111
Pa_1_16030	GO:0003677, GO:0008270, GO:0003676
Pa_1_16040	GO:0005737, GO:0005829, GO:0005634, GO:0003677, GO:0008270, GO:0003700, GO:0005515, GO:0005524, GO:0003676, GO:0006281, GO:0003723, GO:0017111, GO:0030702, GO:0031072, GO:0008026, GO:0004386, GO:0004003, GO:0000184, GO:0006338, GO:0007049, GO:0007059, GO:0031380, GO:0031048
Pa_1_16050	GO:0016740, GO:0005829, GO:0006351, GO:0000790, GO:0006357, GO:0045944, GO:0000124, GO:0048096, GO:0000122, GO:0010590, GO:0017025, GO:0003712, GO:0016573
Pa_1_16060	GO:0006886, GO:0016301, GO:0004872, GO:0031227, GO:0016788, GO:0006505
Pa_1_16070	GO:0005737, GO:0005634, GO:0009116, GO:0005488, GO:0003824, GO:0006886, GO:0006281, GO:0043130, GO:0031227, GO:0016788, GO:0006505, GO:0006511, GO:0004620, GO:0000502, GO:0043161, GO:0006303, GO:0016574
Pa_1_16120	GO:0050662, GO:0005488, GO:0003824, GO:0016829, GO:0000287, GO:0044237
Pa_1_16130	GO:0005634, GO:0003677, GO:0008270, GO:0030447, GO:0006355, GO:0046084
Pa_1_16140	GO:0005737, GO:0016787, GO:0005829, GO:0005634, GO:0003677, GO:0005622, GO:0008270, GO:0003700, GO:0000023, GO:0001950, GO:0009986, GO:0005576, GO:0005515, GO:0003824, GO:0006777, GO:0030447, GO:0005975, GO:0043169, GO:0005739, GO:0016798, GO:0044247, GO:0046379, GO:0032450, GO:0004574, GO:0008788, GO:0000025, GO:0043896, GO:0005987, GO:0004575, GO:0046352
Pa_1_16150	GO:0016020, GO:0046873
Pa_1_16160	GO:0005525
Pa_1_16170	GO:0004553, GO:0005975, GO:0030246, GO:0016772
Pa_1_16180	GO:0005737, GO:0005634, GO:0003677, GO:0008270, GO:0003700, GO:0006508, GO:0005524, GO:0003723, GO:0033554, GO:0004190, GO:0003964, GO:0006278, GO:0005874, GO:0006355, GO:0003777, GO:0004523, GO:0006310, GO:0003887, GO:0015074, GO:0007018, GO:0046797
Pa_1_16210	GO:0008270, GO:0003676, GO:0003723, GO:0003964, GO:0006278
Pa_1_16220	GO:0016491
Pa_1_16230	GO:0050660, GO:0008270, GO:0051920, GO:0020037, GO:0003995, GO:0016627, GO:0047616, GO:0018576, GO:0008199, GO:0009712, GO:0008470, GO:0004085
Pa_1_16250	GO:0005737, GO:0006730, GO:0004013
Pa_1_16260	GO:0003824
Pa_1_16270	GO:0005634, GO:0008270, GO:0003700
Pa_1_16280	GO:0050660, GO:0016021, GO:0003700, GO:0005506, GO:0016491, GO:0004497, GO:0018658, GO:0055085, GO:0009055, GO:0051537, GO:0006725
Pa_1_16290	GO:0005622, GO:0008270, GO:0003676
Pa_1_1630	GO:0016021, GO:0005789, GO:0006506, GO:0051301, GO:0007049, GO:0042765, GO:0016255
Pa_1_16300	GO:0046872, GO:0016787, GO:0005576, GO:0030248, GO:0004553, GO:0030245, GO:0008810, GO:0005975, GO:0016798
Pa_1_16310	GO:0003677, GO:0006366
Pa_1_16330	GO:0005634, GO:0008270, GO:0003700, GO:0005488, GO:0016491, GO:0004090, GO:0008874, GO:0050085, GO:0047038
Pa_1_16340	GO:0016787, GO:0008270, GO:0018849
Pa_1_16350	GO:0016787, GO:0005829, GO:0005634, GO:0008270, GO:0006508, GO:0009986, GO:0005576, GO:0003824, GO:0005975, GO:0007047, GO:0043169, GO:0004177, GO:0016788, GO:0006629, GO:0016798, GO:0004252, GO:0009313, GO:0051301, GO:0007049, GO:0044275, GO:0044247, GO:0046379, GO:0005619, GO:0051118, GO:0043188, GO:0030995, GO:0033919, GO:0072316
Pa_1_16360	GO:0016021, GO:0016702, GO:0050054, GO:0005375
Pa_1_16370	GO:0005737, GO:0005634, GO:0008270, GO:0003700, GO:0005509, GO:0004668, GO:0018101
Pa_1_16380	GO:0016884, GO:0016740, GO:0016787, GO:0051287, GO:0016616, GO:0006355, GO:0007165, GO:0030411, GO:0006582
Pa_1_16390	GO:0005488, GO:0003854, GO:0006694, GO:0016853
Pa_1_1640	GO:0005622, GO:0042493, GO:0005488, GO:0005515, GO:0030447, GO:0009405, GO:0005730, GO:0000462, GO:0006364, GO:0030687, GO:0007049, GO:0005654, GO:0042273, GO:0008283, GO:0070545
Pa_1_16400	GO:0016021, GO:0005886, GO:0005783, GO:0046982, GO:0005375, GO:0015679
Pa_1_16410	GO:0050660, GO:0016021, GO:0005506, GO:0016491, GO:0005886, GO:0009055, GO:0005739, GO:0000329, GO:0005624, GO:0006879, GO:0022900, GO:0000293, GO:0015891, GO:0015677, GO:0055072, GO:0006826, GO:0006811, GO:0006880
Pa_1_16420	GO:0006508, GO:0004180, GO:0008236
Pa_1_16430	GO:0003677, GO:0005524, GO:0015074
Pa_1_16440	GO:0005634, GO:0050660, GO:0003677, GO:0008270, GO:0005488, GO:0016491, GO:0004497, GO:0018658, GO:0009055, GO:0006351, GO:0016831
Pa_1_16450	GO:0046872, GO:0016787, GO:0030145, GO:0000324, GO:0005783, GO:0033554, GO:0019627, GO:0016813, GO:0008783, GO:0004053
Pa_1_16490	GO:0050660, GO:0003677, GO:0008270, GO:0016021, GO:0005524, GO:0055085, GO:0016020, GO:0004674, GO:0016614, GO:0046873, GO:0016772, GO:0004672, GO:0015074
Pa_1_1650	GO:0003677, GO:0003743, GO:0005622, GO:0008270, GO:0008080, GO:0003676, GO:0006355
Pa_1_16500	GO:0005622, GO:0008270, GO:0003676
Pa_1_16510	GO:0003677, GO:0008270, GO:0016021, GO:0005524, GO:0020037, GO:0008061, GO:0005529, GO:0004872, GO:0016798, GO:0004601, GO:0004386, GO:0004338, GO:0006979, GO:0050832, GO:0031640
Pa_1_16520	GO:0005524, GO:0004672
Pa_1_16530	GO:0016020, GO:0046873
Pa_1_16540	GO:0005488, GO:0016491, GO:0009058, GO:0055114
Pa_1_16550	GO:0008270, GO:0005524
Pa_1_16560	GO:0016021, GO:0005488, GO:0055085, GO:0005743, GO:0008565
Pa_1_16580	GO:0005840, GO:0005730, GO:0003779, GO:0030529, GO:0006364, GO:0030687, GO:0000466, GO:0000463, GO:0042273
Pa_1_16600	GO:0005840, GO:0003735, GO:0005515, GO:0002181, GO:0000036, GO:0006633, GO:0006414, GO:0022625
Pa_1_16610	GO:0016884, GO:0046872, GO:0005829, GO:0008270, GO:0005524, GO:0005816, GO:0004674, GO:0035556, GO:0007165, GO:0004672, GO:0005635, GO:0006397, GO:0000778, GO:0007094, GO:0031134, GO:0051301, GO:0007067, GO:0004712, GO:0034613, GO:0051225, GO:0007103
Pa_1_16620	GO:0005488, GO:0055085, GO:0015031, GO:0005788
Pa_1_16630	GO:0016021, GO:0005515, GO:0009055, GO:0006810, GO:0005743, GO:0005747, GO:0008137, GO:0006917, GO:0006120, GO:0030308, GO:0072593, GO:0044238
Pa_1_16650	GO:0005840, GO:0003735, GO:0006412, GO:0003723, GO:0005730, GO:0015935, GO:0022627, GO:0002181, GO:0006407, GO:0000056
Pa_1_16660	GO:0016787, GO:0005576, GO:0005975, GO:0007047, GO:0043169, GO:0045490, GO:0016998, GO:0043245, GO:0015926, GO:0031218, GO:0030247
Pa_1_16670	GO:0008270, GO:0016491, GO:0005524, GO:0004075
Pa_1_16690	GO:0005840, GO:0003735, GO:0006412, GO:0009055, GO:0045454, GO:0015035, GO:0019843
Pa_1_1670	GO:0005737, GO:0005829, GO:0008270, GO:0016491, GO:0005759, GO:0005524, GO:0005739, GO:0002181, GO:0004812, GO:0006418, GO:0004832, GO:0006438, GO:0004822, GO:0006428, GO:0070152
Pa_1_16710	GO:0005840, GO:0003735, GO:0006412, GO:0003723
Pa_1_16720	GO:0005829, GO:0006367, GO:0042493, GO:0006508, GO:0005515, GO:0000932, GO:0016020, GO:0003723, GO:0008236, GO:0006366, GO:0003697, GO:0003899, GO:0016591, GO:0031123, GO:0005665, GO:0003727, GO:0031369, GO:0000291, GO:0060213, GO:0045948
Pa_1_16730	GO:0016021, GO:0005789
Pa_1_16750	GO:0005737, GO:0005525, GO:0005829, GO:0005634, GO:0005524, GO:0000287, GO:0000049, GO:0000166, GO:0017111, GO:0008033, GO:0004826, GO:0006432, GO:0034087
Pa_1_16760	GO:0016740, GO:0005737, GO:0006730, GO:0046872, GO:0005829, GO:0005634, GO:0009986, GO:0030446, GO:0005886, GO:0005524, GO:0000287, GO:0004478, GO:0006556, GO:0006555
Pa_1_16780	GO:0006730, GO:0046656, GO:0016787, GO:0005829, GO:0005634, GO:0005488, GO:0004488, GO:0009396, GO:0004487, GO:0009113, GO:0006164
Pa_1_16790	GO:0016021, GO:0005886, GO:0016020, GO:0030428
Pa_1_1680	GO:0005737, GO:0005829, GO:0005634, GO:0003743, GO:0005515, GO:0005524, GO:0003676, GO:0042254, GO:0005816, GO:0005739, GO:0003723, GO:0005730, GO:0008026, GO:0004386, GO:0000184, GO:0004004, GO:0006364, GO:0030686, GO:0006397, GO:0015986, GO:0005681, GO:0045292, GO:0008380, GO:0000276, GO:0015078, GO:0048254, GO:0033592
Pa_1_16800	GO:0005488
Pa_1_16810	GO:0016021, GO:0008233, GO:0005787, GO:0006465
Pa_1_16820	GO:0005829, GO:0016021, GO:0016020, GO:0005789, GO:0072546, GO:0034975
Pa_1_16825	GO:0003677, GO:0003723, GO:0003899
Pa_1_16830	GO:0008270, GO:0003676
Pa_1_16840	GO:0016787, GO:0016021, GO:0006896, GO:0004180, GO:0004872, GO:0006623, GO:0010008, GO:0005794, GO:0015031, GO:0000166, GO:0005048, GO:0030433, GO:0031902
Pa_1_16850	GO:0046872, GO:0005759, GO:0009986, GO:0005576, GO:0042710, GO:0005618, GO:0007047, GO:0009277, GO:0031505, GO:0005739, GO:0007005, GO:0009405, GO:0006914, GO:0035556, GO:0016798, GO:0006950, GO:0009272, GO:0005741, GO:0006275, GO:0000917, GO:0007049, GO:0044406, GO:0000920, GO:0008422, GO:0001308, GO:0000422
Pa_1_16860	GO:0005622, GO:0008270, GO:0003676
Pa_1_16870	GO:0016747, GO:0016021, GO:0006071, GO:0005783, GO:0005789, GO:0004144, GO:0016758, GO:0005811, GO:0003841, GO:0008610, GO:0046339, GO:0019915, GO:0019432
Pa_1_16880	GO:0016787, GO:0004091, GO:0004806, GO:0047739
Pa_1_1690	GO:0050660, GO:0008762
Pa_1_16900	GO:0005622, GO:0016021, GO:0005488, GO:0016491, GO:0004872, GO:0000329, GO:0006888, GO:0031966
Pa_1_16910	GO:0046872, GO:0005576, GO:0003676, GO:0004519, GO:0006308, GO:0008254
Pa_1_16920	GO:0005634, GO:0008270, GO:0005840, GO:0003735, GO:0006412, GO:0003700
Pa_1_16940	GO:0003743
Pa_1_16950	GO:0009055, GO:0020037, GO:0016705, GO:0006357, GO:0000122, GO:0016592, GO:0001104, GO:0000411
Pa_1_16970	GO:0005840
Pa_1_16980	GO:0005840
Pa_1_16990	GO:0005634, GO:0005622, GO:0008270, GO:0005488, GO:0006508, GO:0003676, GO:0003723, GO:0000166, GO:0006397, GO:0008234
Pa_1_170	GO:0016021, GO:0055085, GO:0009055, GO:0020037, GO:0016705, GO:0004872
Pa_1_1700	GO:0005524, GO:0004674, GO:0003746
Pa_1_17000	GO:0003743, GO:0005777, GO:0003746, GO:0043022, GO:0008612, GO:0045901, GO:0045905, GO:0006452
Pa_1_17010	GO:0005737, GO:0005829, GO:0005634, GO:0008270, GO:0003700, GO:0005488, GO:0006810, GO:0002181, GO:0006611
Pa_1_17030	GO:0016787, GO:0005829, GO:0005515, GO:0006511, GO:0005635, GO:0007346, GO:0000502, GO:0034515, GO:0043161, GO:0008180, GO:0010388, GO:0034399, GO:0043248, GO:0031144, GO:0008541
Pa_1_17040	GO:0005622, GO:0008168, GO:0006629, GO:0035556, GO:0004221, GO:0006511, GO:0000290, GO:0004629
Pa_1_17050	GO:0016491, GO:0008061, GO:0043169, GO:0016998, GO:0008171, GO:0004568, GO:0006032, GO:0030790, GO:0047146
Pa_1_17070	GO:0016747, GO:0008270, GO:0016021, GO:0016491, GO:0048037, GO:0005524, GO:0003824, GO:0055085, GO:0009055, GO:0020037, GO:0016705, GO:0006281, GO:0005215, GO:0030870, GO:0000036, GO:0009058
Pa_1_17090	GO:0016021, GO:0005524, GO:0016020, GO:0016301, GO:0000155, GO:0018106, GO:0004872, GO:0009405, GO:0006355, GO:0030448, GO:0000156, GO:0009272, GO:0051042, GO:0050765, GO:0044011, GO:0000161, GO:0005887, GO:0018298, GO:0008020
Pa_1_1710	GO:0046872, GO:0050660, GO:0008762, GO:0009116, GO:0016021, GO:0005524, GO:0055085, GO:0016301, GO:0000287, GO:0000324, GO:0004674, GO:0005789, GO:0005215, GO:0005774, GO:0000329, GO:0008324, GO:0006874, GO:0004749, GO:0009156, GO:0015369, GO:0015386, GO:0015085, GO:0003968
Pa_1_17100	GO:0005737, GO:0005829, GO:0005634, GO:0005515, GO:0005524, GO:0016301, GO:0006189, GO:0046084, GO:0006164, GO:0004639, GO:0004831, GO:0006437
Pa_1_17110	GO:0005622, GO:0006508, GO:0009986, GO:0005576, GO:0005886, GO:0031225, GO:0009277, GO:0031505, GO:0046658, GO:0008237, GO:0009405, GO:0004190, GO:0030287, GO:0043171, GO:0044406, GO:0005199, GO:0020012, GO:0044267, GO:0006465, GO:0000754, GO:0002253, GO:0052391, GO:0052155, GO:0016485
Pa_1_17130	GO:0050660, GO:0008762, GO:0005886, GO:0016020, GO:0009405, GO:0009058, GO:0030448, GO:0034599, GO:0031966, GO:0031307, GO:0003885, GO:0006767, GO:0070485, GO:0050105
Pa_1_17140	GO:0005524, GO:0006164, GO:0004639
Pa_1_17160	GO:0016787, GO:0045493, GO:0016788, GO:0006629, GO:0046555
Pa_1_17170	GO:0005737, GO:0046872, GO:0005829, GO:0005634, GO:0042493, GO:0005515, GO:0005524, GO:0005816, GO:0030447, GO:0031505, GO:0016301, GO:0004674, GO:0006914, GO:0015031, GO:0006995, GO:0000747, GO:0032258, GO:0016236, GO:0007165, GO:0004672, GO:0005635, GO:0051301, GO:0007067, GO:0007049, GO:0034727, GO:0007163, GO:0004693, GO:0005935, GO:0034613, GO:0046777, GO:0007076, GO:0000920, GO:0071937, GO:…
Pa_1_17180	GO:0005829, GO:0005634, GO:0005515, GO:0016874, GO:0043161, GO:0000151
Pa_1_17190	GO:0005737, GO:0016787, GO:0009116, GO:0008270, GO:0016021, GO:0005524, GO:0003824, GO:0000324, GO:0016811, GO:0070403, GO:0006342, GO:0006476, GO:0006623, GO:0005783, GO:0004674, GO:0007035, GO:0005774, GO:0045263, GO:0033179, GO:0046933, GO:0015991, GO:0015986, GO:0006879, GO:0006897, GO:0046961, GO:0008553, GO:0006878, GO:0015078, GO:0000220
Pa_1_17200	GO:0005829, GO:0005634, GO:0005622, GO:0005488, GO:0005515, GO:0032153, GO:0000131, GO:0031505, GO:0005089, GO:0035023, GO:0035556, GO:0009272, GO:0008360, GO:0007264, GO:0030428, GO:0000917, GO:0007015, GO:0007049, GO:0005934, GO:0043332, GO:0051666, GO:0005083, GO:0030010, GO:0051285, GO:0030476, GO:0004871, GO:0007117, GO:0005546, GO:0000935, GO:0010590, GO:0090334, GO:0045807, GO:0051518, GO:…
Pa_1_17230	GO:0005829, GO:0030447, GO:0005681, GO:0046540, GO:0045292
Pa_1_17240	GO:0016884, GO:0016740, GO:0005737, GO:0046872, GO:0016787, GO:0005829, GO:0006412, GO:0005524, GO:0016829, GO:0005739, GO:0009405, GO:0003755, GO:0006457, GO:0006355, GO:0007029, GO:0004075, GO:0004485, GO:0004039, GO:0004847, GO:0071469, GO:0019740, GO:0043419, GO:0006525, GO:0000256, GO:0032543, GO:0050567, GO:0030956, GO:0070681, GO:0004040, GO:0006399
Pa_1_17250	GO:0005488, GO:0048015, GO:0005942, GO:0016303
Pa_1_17260	GO:0005634, GO:0005622, GO:0008270, GO:0003700, GO:0009055, GO:0005089, GO:0035023, GO:0016706
Pa_1_17270	GO:0003824, GO:0016874, GO:0004467, GO:0047077, GO:0004474, GO:0006097, GO:0016207
Pa_1_17280	GO:0046872, GO:0051537, GO:0005741, GO:0047547, GO:0019629, GO:0019543
Pa_1_17290	GO:0005737, GO:0030036
Pa_1_1730	GO:0046872, GO:0055085, GO:0005743, GO:0042719, GO:0045039
Pa_1_17300	GO:0005737, GO:0003677, GO:0016021, GO:0022857, GO:0005886, GO:0005524, GO:0055085, GO:0006281, GO:0005874, GO:0003777, GO:0017183, GO:0007018, GO:0032217
Pa_1_17310	GO:0005829, GO:0005634, GO:0005840, GO:0032153, GO:0051286, GO:0005816, GO:0007165, GO:0000920, GO:0004016
Pa_1_17320	GO:0019901, GO:0000079
Pa_1_17330	GO:0005737, GO:0005829, GO:0003743, GO:0005840, GO:0001950, GO:0005515, GO:0005524, GO:0000932, GO:0003676, GO:0003723, GO:0005730, GO:0008026, GO:0004386, GO:0004004, GO:0006364, GO:0016281, GO:0006397, GO:0051028, GO:0006417, GO:0010494, GO:0000753, GO:0033962, GO:0000290, GO:0034063, GO:0006348, GO:0006368, GO:0005681, GO:0008380, GO:0006406, GO:0000781, GO:0000348, GO:0000346, GO:0031124, GO:…
Pa_1_17350	GO:0005737, GO:0016616, GO:0050662, GO:0020037, GO:0032153, GO:0051286, GO:0007126, GO:0008677, GO:0050661, GO:0015940, GO:0010181
Pa_1_17370	GO:0005737, GO:0005829, GO:0005634, GO:0016874, GO:0015937, GO:0004633, GO:0004632
Pa_1_17380	GO:0016021, GO:0016020, GO:0046873, GO:0005743, GO:0006397, GO:0008380, GO:0006811, GO:0015095, GO:0045016
Pa_1_17390	GO:0005829, GO:0005634, GO:0005622, GO:0005515, GO:0032153, GO:0005089, GO:0035023, GO:0035556, GO:0009272, GO:0008360, GO:0030428, GO:0000917, GO:0007049, GO:0051666, GO:0005083, GO:0051285, GO:0030476, GO:0000935, GO:0010590, GO:0090334, GO:0051518, GO:0035025, GO:0032319, GO:0060622, GO:0003896, GO:0006269, GO:0030994, GO:0060624
Pa_1_1740	GO:0008152, GO:0070822
Pa_1_17410	GO:0005829, GO:0003676, GO:0016788, GO:0030148, GO:0016442, GO:0031047
Pa_1_17420	GO:0005737, GO:0005829, GO:0005634, GO:0006098, GO:0009986, GO:0003824, GO:0005975, GO:0004801, GO:0009052
Pa_1_17430	GO:0016787
Pa_1_17460	GO:0016787
Pa_1_17470	GO:0005829, GO:0005622, GO:0008270, GO:0005524, GO:0005739, GO:0004674, GO:0005789, GO:0030433, GO:0072671
Pa_1_17480	GO:0005829, GO:0006508, GO:0009986, GO:0005576, GO:0005886, GO:0042710, GO:0003824, GO:0030248, GO:0004553, GO:0005975, GO:0005618, GO:0031225, GO:0009277, GO:0008061, GO:0043169, GO:0016998, GO:0033554, GO:0004190, GO:0006950, GO:0005935, GO:0000128, GO:0001403, GO:0007124, GO:0007155, GO:0004339, GO:0070263, GO:0050839, GO:0016337
Pa_1_17490	GO:0005886
Pa_1_1750	GO:0005829, GO:0005634, GO:0008270, GO:0033554, GO:0016874, GO:0030288, GO:0015035, GO:0043161, GO:0034657, GO:0045721
Pa_1_17500	GO:0016020, GO:0015450, GO:0006605
Pa_1_17510	GO:0016021, GO:0008061, GO:0043169, GO:0005789, GO:0004568, GO:0006032, GO:0017176, GO:0006506, GO:0016765, GO:0016872, GO:0000506
Pa_1_17530	GO:0005525, GO:0003677, GO:0005622, GO:0008270, GO:0005509, GO:0007049, GO:0004803, GO:0015074, GO:0006313, GO:0005544
Pa_1_17550	GO:0005634, GO:0008270, GO:0003700
Pa_1_17560	GO:0016021, GO:0003676, GO:0000166, GO:0005375
Pa_1_17570	GO:0005488
Pa_1_17580	GO:0005829, GO:0003677, GO:0006508, GO:0032153, GO:0051286, GO:0016020, GO:0004252, GO:0046873, GO:0030479, GO:0030036, GO:0015629, GO:0005083, GO:0008154, GO:0006461, GO:0005199, GO:0004803, GO:0015074, GO:0006313, GO:0017024
Pa_1_17590	GO:0005525, GO:0005829, GO:0005634, GO:0009116, GO:0042493, GO:0005515, GO:0003824, GO:0003676, GO:0030515, GO:0006886, GO:0016757, GO:0030447, GO:0016020, GO:0016301, GO:0006342, GO:0033554, GO:0031227, GO:0016788, GO:0006505, GO:0006351, GO:0046873, GO:0030490, GO:0030529, GO:0006364, GO:0032040, GO:0000480, GO:0000447, GO:0000472, GO:0000790, GO:0042393, GO:0003714, GO:0000122, GO:0034388, GO:…
Pa_1_1760	GO:0016787, GO:0003824
Pa_1_17600	GO:0005829, GO:0005634, GO:0003743, GO:0042493, GO:0000226, GO:0008168, GO:0032153, GO:0051286, GO:0003779, GO:0030479, GO:0006897, GO:0000147, GO:0030036, GO:0000001, GO:0005856, GO:0005198, GO:0030833, GO:0005885, GO:0034314, GO:0006898
Pa_1_17610	GO:0005634, GO:0003700, GO:0043565, GO:0046983
Pa_1_17620	GO:0016021, GO:0042493, GO:0005515, GO:0006364, GO:0032040, GO:0030692, GO:0000480, GO:0000447, GO:0000472
Pa_1_17630	GO:0016787, GO:0016021, GO:0005759, GO:0005886, GO:0005515, GO:0046933, GO:0015986, GO:0006200, GO:0022904, GO:0005753, GO:0042776, GO:0000276, GO:0015078, GO:0000274, GO:0035786, GO:0006119, GO:0016887
Pa_1_17640	GO:0005737, GO:0003677, GO:0016616, GO:0008677, GO:0050661, GO:0015940
Pa_1_17650	GO:0050660, GO:0008762, GO:0003677, GO:0008677, GO:0050661
Pa_1_17660	GO:0005743, GO:0006744
Pa_1_17670	GO:0051287, GO:0016616, GO:0005840, GO:0008168, GO:0018024
Pa_1_17680	GO:0016740, GO:0006886, GO:0016020, GO:0005801
Pa_1_17690	GO:0016787, GO:0016491, GO:0006508, GO:0007047, GO:0016998, GO:0006629, GO:0035556, GO:0016798, GO:0004252, GO:0008081, GO:0004629, GO:0042973, GO:0004338
Pa_1_1770	GO:0005737, GO:0005829, GO:0005634, GO:0005524, GO:0016301, GO:0005743, GO:0005758, GO:0006270, GO:0004017, GO:0009165, GO:0046899, GO:0006172
Pa_1_17700	GO:0050660, GO:0005488, GO:0016491, GO:0004497, GO:0050661, GO:0004499, GO:0018660
Pa_1_17710	GO:0005634, GO:0003677, GO:0008270, GO:0003676
Pa_1_17720	GO:0016787, GO:0003677, GO:0006367, GO:0003743, GO:0005524, GO:0003824, GO:0005816, GO:0006355, GO:0004386, GO:0000991, GO:0005674
Pa_1_17730	GO:0016787, GO:0016791
Pa_1_17740	GO:0046872, GO:0016021, GO:0003676, GO:0005739, GO:0016788, GO:0004519
Pa_1_17750	GO:0016021, GO:0005886, GO:0005739, GO:0005783, GO:0051301, GO:0000282, GO:0007049, GO:0005935, GO:0005934, GO:0034613, GO:0031234, GO:0031520, GO:0061161, GO:0005621
Pa_1_17770	GO:0005488, GO:0005515, GO:0003824, GO:0003676, GO:0030529, GO:0003729, GO:0005681, GO:0045292, GO:0071004, GO:0005686, GO:0000245
Pa_1_17780	GO:0003677, GO:0005524, GO:0004386
Pa_1_1780	GO:0016021, GO:0005886, GO:0003676, GO:0005509, GO:0005743, GO:0006813, GO:0043022, GO:0030007, GO:0071805, GO:0051204, GO:0097033, GO:0097034, GO:0070131
Pa_1_17800	GO:0005634, GO:0003677, GO:0016021, GO:0003824, GO:0016829, GO:0005739, GO:0016798, GO:0006289, GO:0006284, GO:0003684, GO:0004871, GO:0005375, GO:0008534, GO:0006285
Pa_1_17820	GO:0005840, GO:0003735, GO:0006412, GO:0003676, GO:0022627, GO:0002181, GO:0000462, GO:0000166, GO:0003779, GO:0030686, GO:0015109, GO:0070181
Pa_1_17825	GO:0005622, GO:0006355
Pa_1_17830	GO:0046872, GO:0005634, GO:0004518, GO:0016788
Pa_1_17860	GO:0005634, GO:0050660, GO:0003677, GO:0003700, GO:0005488, GO:0005515, GO:0071280, GO:0006109, GO:0071469, GO:0016602, GO:0000436, GO:0043457, GO:0002098, GO:0000978, GO:0033217
Pa_1_17870	GO:0016787, GO:0005829, GO:0005515, GO:0000932, GO:0008168, GO:0003676, GO:0003723, GO:0005730, GO:0030529, GO:0006364, GO:0008033, GO:0005732, GO:0046540, GO:0045292, GO:0000398, GO:0005688, GO:0006402, GO:0000956
Pa_1_17880	GO:0046872, GO:0016787, GO:0005634, GO:0008270, GO:0008168, GO:0004497, GO:0009055, GO:0020037, GO:0016705, GO:0006281, GO:0003684, GO:0006302, GO:0008409, GO:0008800, GO:0017001
Pa_1_17890	GO:0005737, GO:0005829, GO:0005634, GO:0003743, GO:0003700, GO:0005515, GO:0030437, GO:0043565, GO:0090307, GO:0071540, GO:0071541, GO:0071313, GO:0070196, GO:0033566
Pa_1_1790	GO:0016021, GO:0005886, GO:0000139, GO:0004725, GO:0008138
Pa_1_17900	GO:0005634, GO:0003743, GO:0003700, GO:0005524, GO:0043565, GO:0046983, GO:0019205, GO:0006139
Pa_1_17910	GO:0005737, GO:0005829, GO:0005634, GO:0042493, GO:0005515, GO:0005524, GO:0060237, GO:0000131, GO:0031505, GO:0005739, GO:0016301, GO:0004674, GO:0007126, GO:0006355, GO:0042802, GO:0030448, GO:0001302, GO:0003854, GO:0006694, GO:0008298, GO:0000156, GO:0007346, GO:0000329, GO:0000753, GO:0030428, GO:0007163, GO:0051519, GO:0005935, GO:0006357, GO:0071470, GO:0005934, GO:0043332, GO:0051285, GO:…
Pa_1_17920	GO:0016021, GO:0022857, GO:0005886, GO:0005783, GO:0005794, GO:0005887, GO:0005315, GO:0005384, GO:0006797, GO:0001406
Pa_1_17930	GO:0005634, GO:0003677, GO:0008270, GO:0003700, GO:0006351, GO:0030798
Pa_1_17960	GO:0005737
Pa_1_17970	GO:0005488, GO:0016491
Pa_1_17980	GO:0005622, GO:0005488, GO:0016491, GO:0003676, GO:0016020, GO:0000166, GO:0004221, GO:0006511, GO:0008874, GO:0008709, GO:0004316
Pa_1_17990	GO:0050660, GO:0000166, GO:0003995
Pa_1_180	GO:0005634, GO:0003677, GO:0008270, GO:0003700, GO:0010508
Pa_1_1800	GO:0016884, GO:0050660, GO:0008762, GO:0016021, GO:0005759, GO:0005524, GO:0055085, GO:0004674, GO:0016614, GO:0005743, GO:0009060, GO:0004871, GO:0003968, GO:0004458, GO:0044262
Pa_1_18010	GO:0016740, GO:0005737, GO:0050660, GO:0004631, GO:0008762, GO:0006695, GO:0009116, GO:0016614, GO:0008479, GO:0008616
Pa_1_18030	GO:0046872, GO:0005634, GO:0008270, GO:0016491, GO:0005576, GO:0004497, GO:0030248, GO:0004553, GO:0005975, GO:0005529, GO:0016788, GO:0005507, GO:0042438, GO:0004503, GO:0004097
Pa_1_18040	GO:0016491, GO:0009055, GO:0020037, GO:0016705, GO:0016702
Pa_1_18050	GO:0008080
Pa_1_18060	GO:0003676, GO:0046983
Pa_1_18070	GO:0050662, GO:0003824, GO:0044237, GO:0016853
Pa_1_18080	GO:0005737, GO:0005829, GO:0005634, GO:0005524, GO:0004356, GO:0006807, GO:0006542, GO:0019740
Pa_1_18090	GO:0020037, GO:0019825, GO:0015671
Pa_1_1810	GO:0016884, GO:0016740, GO:0016787, GO:0050660, GO:0008762, GO:0016811, GO:0004040
Pa_1_18120	GO:0003677, GO:0005524, GO:0003676, GO:0004386
Pa_1_18130	GO:0006457, GO:0031072, GO:0051087
Pa_1_18140	GO:0016787, GO:0008270, GO:0016491, GO:0005759, GO:0006457, GO:0016226, GO:0031072, GO:0006950, GO:0009060, GO:0051087
Pa_1_18150	GO:0016884, GO:0016740, GO:0016787, GO:0005829, GO:0005634, GO:0005622, GO:0008270, GO:0016021, GO:0005488, GO:0016491, GO:0005524, GO:0055085, GO:0016020, GO:0016811, GO:0015171, GO:0004674, GO:0046873, GO:0006631, GO:0004040
Pa_1_18160	GO:0016884, GO:0016021, GO:0008643, GO:0005524, GO:0008168, GO:0003676, GO:0055085, GO:0005739, GO:0004674, GO:0016788, GO:0016620, GO:0006397, GO:0005938, GO:0015665, GO:0022890
Pa_1_18170	GO:0005737, GO:0003743, GO:0005488, GO:0008180
Pa_1_18180	GO:0016787, GO:0016788, GO:0006629
Pa_1_18190	GO:0005737, GO:0005634, GO:0003677, GO:0008270, GO:0016491, GO:0020037, GO:0006810, GO:0008677, GO:0050661, GO:0015940, GO:0006351, GO:0010181, GO:0005758, GO:0022900, GO:0070469, GO:0004460, GO:0006089, GO:0003973
Pa_1_18220	GO:0005737, GO:0005829, GO:0005634, GO:0005789, GO:0007346, GO:0005839, GO:0004298, GO:0051603, GO:0019774, GO:0034515, GO:0043161, GO:0010499, GO:0043248
Pa_1_18230	GO:0016740, GO:0005737, GO:0005829, GO:0042493, GO:0008483, GO:0008152, GO:0005975, GO:0005529, GO:0030448, GO:0006487, GO:0004746, GO:0009231, GO:0034221, GO:0006038, GO:0006031, GO:0006541, GO:0009349, GO:0004360, GO:0016051, GO:0006042, GO:0045229
Pa_1_18240	GO:0005737, GO:0005829, GO:0005634, GO:0005515, GO:0005524, GO:0003723, GO:0008233, GO:0017111, GO:0016887, GO:0006289, GO:0030529, GO:0006511, GO:0005635, GO:0007346, GO:0030433, GO:0045899, GO:0032968, GO:0000502, GO:0043161, GO:0030163, GO:0008540, GO:0004175, GO:0019904, GO:0070682, GO:0045732
Pa_1_18250	GO:0005634, GO:0008270, GO:0003700
Pa_1_18260	GO:0016787, GO:0016021, GO:0055085
Pa_1_18270	GO:0016740, GO:0005737, GO:0005488, GO:0006508, GO:0009986, GO:0005576, GO:0030446, GO:0005886, GO:0042710, GO:0003824, GO:0030447, GO:0004553, GO:0005975, GO:0005618, GO:0007047, GO:0031225, GO:0016020, GO:0009277, GO:0031505, GO:0008061, GO:0043169, GO:0016998, GO:0000324, GO:0009405, GO:0006457, GO:0005783, GO:0033554, GO:0004190, GO:0000747, GO:0051082, GO:0006950, GO:0004568, GO:0006032, GO:…
Pa_1_1830	GO:0016740, GO:0046872, GO:0016021, GO:0005524, GO:0003824, GO:0020037, GO:0016757, GO:0042626, GO:0004601, GO:0006979
Pa_1_18300	GO:0016021, GO:0016757, GO:0016760, GO:0030244
Pa_1_18310	GO:0046872, GO:0005576, GO:0005529, GO:0007155, GO:0045480
Pa_1_18330	GO:0005524, GO:0004553, GO:0005975, GO:0043169, GO:0030246, GO:0004672, GO:0004565, GO:0009341, GO:0004566
Pa_1_18340	GO:0008270, GO:0005488
Pa_1_18350	GO:0005737, GO:0008270, GO:0005488, GO:0016491, GO:0004222, GO:0006508, GO:0005524, GO:0009055, GO:0020037, GO:0016705, GO:0006457, GO:0006629, GO:0031072, GO:0051082, GO:0009408, GO:0016630
Pa_1_18360	GO:0005840, GO:0008168, GO:0004497, GO:0009055, GO:0020037, GO:0016705, GO:0006357, GO:0016592, GO:0001104
Pa_1_18380	GO:0003677, GO:0006366, GO:0005665
Pa_1_18390	GO:0003824, GO:0016020
Pa_1_18400	GO:0008270, GO:0003700, GO:0043565
Pa_1_18418	GO:0048315, GO:0030435, GO:0007275
Pa_1_18420	GO:0005634, GO:0003677, GO:0006355
Pa_1_18430	GO:0005634, GO:0003677, GO:0008270, GO:0003676, GO:0005739, GO:0003723, GO:0005730, GO:0000166, GO:0006351, GO:0030529, GO:0006950, GO:0006364, GO:0005732, GO:0007000, GO:0003697, GO:0000028
Pa_1_18440	GO:0005829, GO:0005488, GO:0005515, GO:0003824, GO:0000287, GO:0030976, GO:0004872, GO:0015031, GO:0006635, GO:0005778, GO:0005052, GO:0016558, GO:0016560
Pa_1_18450	GO:0005737, GO:0005634, GO:0005622, GO:0008270, GO:0003676, GO:0005739, GO:0003723, GO:0006364, GO:0004527, GO:0000175, GO:0000467, GO:0008408, GO:0034415, GO:0034476, GO:0002107
Pa_1_18470	GO:0005829, GO:0008270, GO:0009055, GO:0020037, GO:0000790, GO:0016571
Pa_1_18480	GO:0005634, GO:0005524, GO:0006457, GO:0004812, GO:0006418, GO:0051082, GO:0016272, GO:0007021, GO:0015631
Pa_1_18490	GO:0005525, GO:0005634, GO:0003677, GO:0005886, GO:0005515, GO:0005524, GO:0006260, GO:0006355, GO:0006952, GO:0017111, GO:0016887, GO:0003924, GO:0043596, GO:0030466, GO:0003682, GO:0000790, GO:0051301, GO:0007067, GO:0000785, GO:0005664, GO:0003689, GO:0006270, GO:0033314, GO:0003688, GO:0007090, GO:0000082, GO:0000808, GO:0031261, GO:0005656, GO:0006267, GO:0031938, GO:0030174
Pa_1_1850	GO:0016021, GO:0016746, GO:0007126, GO:0005789, GO:0006506, GO:0005792, GO:0032216
Pa_1_18500	GO:0005829, GO:0005634, GO:0006508, GO:0005515, GO:0000502, GO:0043161, GO:0070682, GO:0005838
Pa_1_18510	GO:0005737, GO:0005525, GO:0016787, GO:0009116, GO:0005515, GO:0005524, GO:0003824, GO:0006886, GO:0016757, GO:0016020, GO:0031227, GO:0016788, GO:0006505, GO:0006915, GO:0046873, GO:0006397, GO:0007049, GO:0005681, GO:0045292, GO:0008380, GO:0000398
Pa_1_18520	GO:0016020, GO:0000155, GO:0005794
Pa_1_18530	GO:0016021, GO:0009055, GO:0020037, GO:0016705, GO:0016811, GO:0006457, GO:0005789, GO:0051082, GO:0000139, GO:0016272, GO:0006672, GO:0071633, GO:0046514, GO:0070774, GO:0050291
Pa_1_18540	GO:0016021, GO:0016811, GO:0006457, GO:0051082, GO:0016272, GO:0006672
Pa_1_18550	GO:0005737, GO:0005525, GO:0005622, GO:0005840, GO:0003735, GO:0006412, GO:0005488, GO:0006508, GO:0006886, GO:0031505, GO:0009405, GO:0006457, GO:0005089, GO:0035023, GO:0003924, GO:0031072, GO:0051082, GO:0006950, GO:0008565, GO:0000139, GO:0007050, GO:0008234, GO:0005887, GO:0048280, GO:0071467
Pa_1_18560	GO:0005737, GO:0005634, GO:0003677, GO:0016021, GO:0005488, GO:0005524, GO:0055085, GO:0006810, GO:0006289, GO:0005743, GO:0004003, GO:0006839, GO:0004816, GO:0006421, GO:0006783
Pa_1_18570	GO:0005634, GO:0019901, GO:0000079, GO:0006355
Pa_1_1860	GO:0005737, GO:0005829, GO:0005634, GO:0016021, GO:0042493, GO:0005515, GO:0042710, GO:0005524, GO:0055085, GO:0005816, GO:0030447, GO:0005975, GO:0005739, GO:0000324, GO:0004674, GO:0006995, GO:0007165, GO:0001302, GO:0000910, GO:0051519, GO:0005935, GO:0001403, GO:0007124, GO:0007155, GO:0031965, GO:0006109, GO:2000766, GO:0046015, GO:0005940, GO:0005938, GO:0031578, GO:0031588, GO:0005641, GO:…
Pa_1_18600	GO:0016740, GO:0005634, GO:0003677, GO:0005622, GO:0008270, GO:0003700, GO:0005488, GO:0003676, GO:0016020, GO:0008233, GO:0005509, GO:0004221, GO:0006511, GO:0000228, GO:0043565, GO:0006338, GO:0006357, GO:0016592, GO:0001104, GO:0004651
Pa_1_18610	GO:0016491, GO:0005524, GO:0016301, GO:0004674, GO:0016772, GO:0004672
Pa_1_18620	GO:0005634, GO:0005515, GO:0005524, GO:0006281, GO:0017111, GO:0006289, GO:0031573, GO:0007131, GO:0000790, GO:0007049, GO:0004527, GO:0031389, GO:0033314, GO:0000077, GO:0007095
Pa_1_18630	GO:0005634, GO:0005524, GO:0006281, GO:0017111, GO:0007049
Pa_1_18640	GO:0046872, GO:0005829, GO:0005634, GO:0006098, GO:0005524, GO:0005975, GO:0004674, GO:0009052, GO:0004750
Pa_1_18650	GO:0003824, GO:0030170, GO:0008483, GO:0008152, GO:0016829, GO:0007005, GO:0000036, GO:0016874, GO:0005743, GO:0004043
Pa_1_18660	GO:0016740, GO:0005829, GO:0005634, GO:0005506, GO:0016702, GO:0031418, GO:0006351, GO:0030529, GO:0006415, GO:0016706, GO:0071456, GO:0010620, GO:0000288, GO:0032436, GO:0008143
Pa_1_18670	GO:0003723
Pa_1_18680	GO:0005737, GO:0005634, GO:0016491, GO:0003824, GO:0030170, GO:0016829, GO:0005975, GO:0010181, GO:0006520, GO:0016810, GO:0004123, GO:0080146, GO:0004121, GO:0019343, GO:0019346, GO:0071266
Pa_1_18690	GO:0030170, GO:0016829, GO:0005975, GO:0045493, GO:0006520, GO:0016810, GO:0050119
Pa_1_1870	GO:0005634, GO:0008270, GO:0003700, GO:0043565, GO:0004871
Pa_1_18700	GO:0046872, GO:0016787, GO:0005634, GO:0016021, GO:0005488, GO:0016491, GO:0033554, GO:0005773, GO:0005774, GO:0000329, GO:0006797, GO:0000298, GO:0004309, GO:0006798
Pa_1_18710	GO:0005634, GO:0005622, GO:0008270, GO:0003700, GO:0003676
Pa_1_18730	GO:0008168, GO:0009055, GO:0020037, GO:0016705
Pa_1_18740	GO:0003743, GO:0005840, GO:0005739
Pa_1_18760	GO:0005829, GO:0005634, GO:0008270, GO:0006281, GO:0006355, GO:0006511, GO:0007346, GO:0000502, GO:0005198, GO:0008540, GO:0031593, GO:0042177
Pa_1_18770	GO:0005829, GO:0005634, GO:0003700, GO:0005783, GO:0043565, GO:0006888, GO:0005801, GO:0030008, GO:0032313
Pa_1_18780	GO:0016021, GO:0055085, GO:0051286, GO:0005789, GO:0000139, GO:0015786, GO:0006493, GO:0034221, GO:0000030, GO:0005338, GO:0005462
Pa_1_18790	GO:0005737, GO:0046872, GO:0005829, GO:0016021, GO:0005515, GO:0005739, GO:0003876, GO:0009168, GO:0006144, GO:0019239, GO:0016814
Pa_1_1880	GO:0046872, GO:0016787, GO:0005634, GO:0003677, GO:0008270, GO:0016021, GO:0003700, GO:0042493, GO:0005488, GO:0005515, GO:0005524, GO:0055085, GO:0006886, GO:0005816, GO:0004518, GO:0006281, GO:0016020, GO:0005739, GO:0007126, GO:0005643, GO:0005789, GO:0012507, GO:0005874, GO:0030870, GO:0003779, GO:0003777, GO:0042802, GO:0017111, GO:0016887, GO:0000724, GO:0031573, GO:0007131, GO:0000723, GO:…
Pa_1_18800	GO:0005829, GO:0005634, GO:0008270, GO:0016021, GO:0005886, GO:0055085, GO:0006886, GO:0032153, GO:0051286, GO:0031505, GO:0005509, GO:0016811, GO:0070403, GO:0006342, GO:0006476, GO:0010008, GO:0043130, GO:0003779, GO:0042802, GO:0030448, GO:0008092, GO:0007015, GO:0030479, GO:0006897, GO:0043332, GO:0007121, GO:0000147, GO:0030427, GO:0030674
Pa_1_18810	GO:0016021, GO:0005789
Pa_1_18820	GO:0005622, GO:0008270
Pa_1_18830	GO:0005829, GO:0016874, GO:0006511, GO:0030071, GO:0016567, GO:0051301, GO:0007067, GO:0031461, GO:0031625, GO:0005680, GO:0031145, GO:0008054
Pa_1_18840	GO:0046872, GO:0005524, GO:0004519, GO:0004527, GO:0004437, GO:0004075, GO:0052659, GO:0052658, GO:0004445
Pa_1_18850	GO:0005737, GO:0005829, GO:0005634, GO:0042493, GO:0001950, GO:0005886, GO:0005515, GO:0005524, GO:0032153, GO:0005816, GO:0006281, GO:0005739, GO:0016301, GO:0005783, GO:0033554, GO:0004674, GO:0005730, GO:0042802, GO:0004672, GO:0030448, GO:0000329, GO:0000902, GO:0008360, GO:0042274, GO:0051455, GO:0007067, GO:0006888, GO:0000910, GO:0051519, GO:0005935, GO:0005654, GO:0006897, GO:0005934, GO:…
Pa_1_18860	GO:0005829, GO:0005886, GO:0005515, GO:0051286, GO:0031505, GO:0004872, GO:0005730, GO:0008360, GO:0005935, GO:0043332, GO:0031097, GO:0030427
Pa_1_18880	GO:0005622, GO:0008270, GO:0003676
Pa_1_18890	GO:0016787, GO:0005634, GO:0003677, GO:0030145, GO:0003723, GO:0005730, GO:0006355, GO:0070478, GO:0004527, GO:0000177, GO:0000176, GO:0000467, GO:0070651, GO:0071042, GO:0071035, GO:0071038, GO:0070481, GO:0071051
Pa_1_1890	GO:0005737, GO:0005829, GO:0005634, GO:0003676, GO:0003723, GO:0006396, GO:0000166, GO:0030529, GO:0045292
Pa_1_18900	GO:0005737, GO:0005829, GO:0005634, GO:0006412, GO:0001950, GO:0009986, GO:0005576, GO:0030446, GO:0005886, GO:0030445, GO:0005515, GO:0044416, GO:0005524, GO:0003676, GO:0009277, GO:0005739, GO:0009636, GO:0006457, GO:0033554, GO:0002181, GO:0016887, GO:0051082, GO:0006950, GO:0005844, GO:0000329, GO:0005788, GO:0030433, GO:0006364, GO:0042026, GO:0006626, GO:0005624, GO:0034605, GO:0032440, GO:…
Pa_1_18920	GO:0005737, GO:0006396, GO:0016846, GO:0006364, GO:0006379, GO:0004526, GO:0001682, GO:0005655, GO:0000172, GO:0034965
Pa_1_18930	GO:0003677, GO:0005622, GO:0008270, GO:0016491, GO:0003676, GO:0016874, GO:0051537
Pa_1_18940	GO:0005737, GO:0005829, GO:0005634, GO:0050660, GO:0042493, GO:0016491, GO:0005515, GO:0005524, GO:0007005, GO:0016301, GO:0009405, GO:0033554, GO:0004674, GO:0030448, GO:0000902, GO:0051301, GO:0044409, GO:0007049, GO:0007265, GO:0001300, GO:0051519, GO:0001403, GO:0031138, GO:0031142, GO:0045014, GO:0004691, GO:0005952, GO:0001315, GO:0019933, GO:0006110
Pa_1_18950	GO:0005737, GO:0005829, GO:0005634, GO:0005622, GO:0016021, GO:0005625, GO:0003824, GO:0006886, GO:0032153, GO:0000131, GO:0005509, GO:0007015, GO:0005935, GO:0005934, GO:0000133, GO:0006887, GO:0005097
Pa_1_18990	GO:0005829, GO:0005634, GO:0016042, GO:0005515, GO:0005509, GO:0006629, GO:0004435, GO:0035556, GO:0034501, GO:0034644, GO:0009395, GO:0004871, GO:0000775, GO:0044242, GO:0048017, GO:0019220, GO:0032958, GO:0001402
Pa_1_1900	GO:0016884, GO:0016740, GO:0003677
Pa_1_19020	GO:0005524, GO:0003676, GO:0000166, GO:0008026
Pa_1_19030	GO:0005525, GO:0005829, GO:0005634, GO:0005622, GO:0008270, GO:0001950, GO:0005886, GO:0005515, GO:0003676, GO:0016020, GO:0009405, GO:0030437, GO:0006995, GO:0003924, GO:0030448, GO:0001302, GO:0034599, GO:0031137, GO:0009272, GO:0008360, GO:0007264, GO:0007265, GO:0032005, GO:0007163, GO:0005935, GO:0007124, GO:0007121, GO:0007051, GO:0033205, GO:0034605, GO:0000751, GO:0045595, GO:0043161, GO:…
Pa_1_19060	GO:0003676, GO:0042254, GO:0003723, GO:0005730, GO:0000166
Pa_1_19070	GO:0005525, GO:0005829, GO:0005634, GO:0005622, GO:0042493, GO:0005625, GO:0005886, GO:0005515, GO:0032153, GO:0051286, GO:0032889, GO:0030447, GO:0016020, GO:0031505, GO:0003924, GO:0031137, GO:0051301, GO:0005624, GO:0009898, GO:0007264, GO:0007049, GO:0005935, GO:0001403, GO:0007124, GO:0005934, GO:0043332, GO:0031384, GO:0007266, GO:0030010, GO:0030427, GO:0004871, GO:0032995, GO:0031234, GO:…
Pa_1_19080	GO:0005634, GO:0003677, GO:0043565, GO:0000786, GO:0006334
Pa_1_19090	GO:0016021, GO:0005886, GO:0016020, GO:0051082, GO:0005743, GO:0009060, GO:0008535, GO:0033617
Pa_1_19110	GO:0005634, GO:0005739, GO:0005758, GO:0009060, GO:0044114, GO:0004129
Pa_1_19120	GO:0003677
Pa_1_19130	GO:0016021, GO:0004872, GO:0004674, GO:0005216
Pa_1_19140	GO:0005737, GO:0005634, GO:0005515, GO:0008168, GO:0003676, GO:0008757, GO:0006417, GO:0035657, GO:0008276, GO:0018364
Pa_1_19150	GO:0005829, GO:0003676, GO:0030529, GO:0003729, GO:0046540, GO:0000243, GO:0005685, GO:0000395
Pa_1_19160	GO:0005525, GO:0003676, GO:0030529, GO:0006511, GO:0003924, GO:0031461, GO:0031625
Pa_1_19170	GO:0005488
Pa_1_19180	GO:0016021, GO:0055085, GO:0006396, GO:0016874
Pa_1_19190	GO:0005737, GO:0005829, GO:0005634, GO:0042493, GO:0005886, GO:0005515, GO:0005524, GO:0005816, GO:0032889, GO:0031505, GO:0005739, GO:0016301, GO:0004674, GO:0005730, GO:0006355, GO:0005773, GO:0007035, GO:0030448, GO:0045132, GO:0000156, GO:0007067, GO:0030428, GO:0007049, GO:0000910, GO:0007163, GO:0005935, GO:0006357, GO:0016539, GO:0071470, GO:0019236, GO:0031097, GO:0046777, GO:0051285, GO:…
Pa_1_1920	GO:0005737, GO:0005829, GO:0005515, GO:0010008, GO:0005794, GO:0006914, GO:0015031, GO:0032258, GO:0035091, GO:0007154, GO:0005774, GO:0000300, GO:0034727, GO:0000407, GO:0032266, GO:0034498, GO:0005769, GO:0000422, GO:0005776
Pa_1_19210	GO:0005829, GO:0005634, GO:0008270, GO:0003700, GO:0042493, GO:0005515, GO:0032153, GO:0030447, GO:0009405, GO:0006629, GO:0043565, GO:0008081, GO:0042128, GO:0045893, GO:0034605, GO:0045944, GO:0071280, GO:0000978, GO:0006808, GO:0090294, GO:0071285
Pa_1_19220	GO:0005829, GO:0005634, GO:0016491, GO:0005739, GO:0005783, GO:0007131, GO:0006284, GO:0016620, GO:0009013, GO:0004029, GO:0008886, GO:0004030, GO:0004777, GO:0003842, GO:0019413, GO:0008957, GO:0006740, GO:0009651
Pa_1_19230	GO:0005622, GO:0016021, GO:0005886, GO:0005515, GO:0005524, GO:0006886, GO:0005739, GO:0000287, GO:0005783, GO:0010008, GO:0005794, GO:0005789, GO:0004012, GO:0045332, GO:0005802, GO:0005624, GO:0007163, GO:0006897, GO:0000028, GO:0015662, GO:0006754, GO:0005388, GO:0006892
Pa_1_19250	GO:0005515, GO:0005524, GO:0007035, GO:0000329, GO:0046933, GO:0015991, GO:0046961, GO:0042777, GO:0008553, GO:0000221, GO:0033178
Pa_1_19260	GO:0016020
Pa_1_19270	GO:0016021, GO:0003824, GO:0005975, GO:0043169
Pa_1_19280	GO:0005634, GO:0003700, GO:0004872, GO:0030448, GO:0043565, GO:0000790, GO:0007049, GO:0006357, GO:0045944, GO:0006270, GO:0003688, GO:0008301, GO:0006525
Pa_1_19290	GO:0016021, GO:0000166, GO:0005375
Pa_1_1930	GO:0046872, GO:0016021, GO:0005488, GO:0006508, GO:0009986, GO:0009405, GO:0005794, GO:0000747, GO:0004252, GO:0030448, GO:0005802, GO:0005199, GO:0016485, GO:0007323, GO:0071432
Pa_1_19300	GO:0005622, GO:0008270, GO:0003676
Pa_1_19310	GO:0005515, GO:0016829, GO:0005777, GO:0006099, GO:0004474, GO:0006097, GO:0006144, GO:0009514
Pa_1_19320	GO:0005829, GO:0008080, GO:0005759, GO:0003824, GO:0016829, GO:0005739, GO:0006099, GO:0045239, GO:0004333, GO:0006106, GO:0044238
Pa_1_19330	GO:0005737, GO:0005525, GO:0005829, GO:0005634, GO:0008270, GO:0042493, GO:0005886, GO:0005515, GO:0042710, GO:0005524, GO:0006777, GO:0003676, GO:0032153, GO:0005816, GO:0071775, GO:0030447, GO:0005975, GO:0016020, GO:0000131, GO:0043169, GO:0005739, GO:0000324, GO:0009405, GO:0033554, GO:0004674, GO:0006995, GO:0007165, GO:0003924, GO:0001302, GO:0008360, GO:0051301, GO:0007067, GO:0009898, GO:…
Pa_1_19340	GO:0016787, GO:0005829, GO:0005634, GO:0003677, GO:0004616, GO:0005515, GO:0005524, GO:0032153, GO:0005816, GO:0030447, GO:0006281, GO:0007126, GO:0051258, GO:0007165, GO:0006310, GO:0000724, GO:0046982, GO:0004871, GO:0007059, GO:0005102, GO:0005694, GO:0051276, GO:0000935, GO:0005577, GO:0030674, GO:0030168, GO:0009295, GO:0030261, GO:0000160, GO:0030915, GO:0048478
Pa_1_19350	GO:0005634, GO:0003677, GO:0005515, GO:0005816, GO:0004518, GO:0006281, GO:0004519, GO:0006259, GO:0000724, GO:0000710, GO:0006311, GO:0003697, GO:0046982, GO:0000110, GO:0000014, GO:0000736, GO:0006296, GO:0000712
Pa_1_19360	GO:0003677, GO:0016021, GO:0051286, GO:0016020, GO:0009405, GO:0003779, GO:0046873, GO:0030448, GO:0006970, GO:0009272, GO:0005826, GO:0008092, GO:0000915, GO:0007163, GO:0030479, GO:0006897, GO:0043332, GO:0007121, GO:0000028, GO:0000147, GO:0045010, GO:0051666, GO:0015629, GO:0005083, GO:0008154, GO:0006461, GO:0005199, GO:0004803, GO:0015074, GO:0006313, GO:0005249, GO:0030041, GO:0000916, GO:…
Pa_1_19370	GO:0005829, GO:0005634, GO:0003743, GO:0005840, GO:0042493, GO:0033592, GO:0003725
Pa_1_19390	GO:0005829, GO:0005622, GO:0005515, GO:0016020, GO:0005794, GO:0015031, GO:0000747, GO:0006355, GO:0000282, GO:0043332, GO:0006893, GO:0030476, GO:0032219, GO:0032220, GO:0034044, GO:0006039
Pa_1_1940	GO:0005488, GO:0005886, GO:0003779, GO:0000902, GO:0005741, GO:0007010
Pa_1_19400	GO:0005488, GO:0016491
Pa_1_19420	GO:0005737, GO:0016787, GO:0005829, GO:0005634, GO:0003677, GO:0008270, GO:0003700, GO:0005524, GO:0003676, GO:0006281, GO:0005509, GO:0017111, GO:0004519, GO:0004386, GO:0043141, GO:0004003, GO:0000184, GO:0005844, GO:0006449, GO:0004004, GO:0030466, GO:0008298, GO:0070478, GO:0016567, GO:0006415, GO:0016817, GO:0004609, GO:0008654, GO:0006364, GO:0008033, GO:0006397, GO:0006369, GO:0035649, GO:…
Pa_1_19430	GO:0009116, GO:0003677, GO:0008080, GO:0003824, GO:0004519, GO:0006284, GO:0016620, GO:0003906, GO:0009113, GO:0004044
Pa_1_19440	GO:0003677, GO:0008168, GO:0006306, GO:0003886
Pa_1_19460	GO:0016787, GO:0008270, GO:0042493, GO:0016491, GO:0005576, GO:0005886, GO:0003824, GO:0009055, GO:0020037, GO:0005618, GO:0007047, GO:0031225, GO:0009277, GO:0031505, GO:0046658, GO:0005783, GO:0016712, GO:0016874, GO:0016052, GO:0030448, GO:0009272, GO:0005624, GO:0007124, GO:0046379, GO:0007117, GO:0008496, GO:0031362, GO:0051692
Pa_1_19490	GO:0016021, GO:0055085, GO:0003993
Pa_1_1950	GO:0030071, GO:0005680, GO:0031145
Pa_1_19520	GO:0005737, GO:0016787, GO:0005829, GO:0005634, GO:0004091, GO:0016491, GO:0005739, GO:0008474, GO:0004622, GO:0006631, GO:0044242, GO:0035601
Pa_1_19530	GO:0005829, GO:0005634, GO:0008270, GO:0016491, GO:0016702, GO:0006725, GO:0008198, GO:0016701
Pa_1_19540	GO:0005737, GO:0016021, GO:0022857, GO:0005524, GO:0003676, GO:0055085, GO:0016020, GO:0005215, GO:0004813, GO:0006419, GO:0015238
Pa_1_19550	GO:0050660, GO:0016021, GO:0005506, GO:0016491, GO:0005886, GO:0005524, GO:0009055, GO:0004672, GO:0022900, GO:0006825, GO:0000293, GO:0015891, GO:0055072, GO:0006827
Pa_1_19560	GO:0008270, GO:0016491, GO:0008718
Pa_1_19570	GO:0005737, GO:0005829, GO:0005634, GO:0016616, GO:0005488, GO:0016491, GO:0004757, GO:0006729
Pa_1_19580	GO:0005829, GO:0005634, GO:0005622, GO:0008270, GO:0003700, GO:0005515, GO:0006351, GO:0043565, GO:0045944, GO:0003714, GO:0000122, GO:0017054, GO:0003713
Pa_1_19600	GO:0016740, GO:0005634, GO:0008270, GO:0016021, GO:0016746, GO:0018024, GO:0030437, GO:0005789, GO:0090002, GO:0006612, GO:0030176, GO:0031211, GO:0032580, GO:0019706, GO:0018345
Pa_1_19610	GO:0005829, GO:0005634, GO:0008168, GO:0008175, GO:0031591
Pa_1_19620	GO:0005739, GO:0006950
Pa_1_19630	GO:0050660, GO:0016021, GO:0005506, GO:0016491, GO:0009986, GO:0005886, GO:0005524, GO:0009055, GO:0004674, GO:0000329, GO:0022900, GO:0000293, GO:0015677, GO:0055072, GO:0006826, GO:0006880
Pa_1_19640	GO:0042493, GO:0005515, GO:0005524, GO:0003824, GO:0003676, GO:0005739, GO:0008026, GO:0003852, GO:0009098, GO:0046912, GO:0019752
Pa_1_19650	GO:0005737, GO:0005525, GO:0005488, GO:0005515, GO:0006886, GO:0005643, GO:0008565, GO:0051301, GO:0031965, GO:0006606, GO:0006612, GO:0006913, GO:0005087, GO:0051292, GO:0006656, GO:0060188
Pa_1_19660	GO:0005634, GO:0003677, GO:0008270, GO:0003700, GO:0003824, GO:0006351
Pa_1_1970	GO:0016787, GO:0016021, GO:0005524, GO:0003824, GO:0055085, GO:0005975, GO:0043169, GO:0016706
Pa_1_19700	GO:0016740, GO:0005737, GO:0005829, GO:0005634, GO:0042493, GO:0003824, GO:0019344, GO:0009086, GO:0004604, GO:0019379, GO:0009973
Pa_1_19710	GO:0005737, GO:0046872, GO:0005634, GO:0005524, GO:0016020, GO:0000287, GO:0005509, GO:0006564, GO:0015662, GO:0006754, GO:0004647
Pa_1_19720	GO:0005737, GO:0005525, GO:0005829, GO:0005634, GO:0005840, GO:0009986, GO:0030446, GO:0030445, GO:0005515, GO:0003779, GO:0003924, GO:0003746, GO:0005856, GO:0051701, GO:0005853, GO:0019003, GO:0006409
Pa_1_19740	GO:0005525, GO:0016021, GO:0005488, GO:0016491, GO:0005886, GO:0003824, GO:0000324, GO:0006623, GO:0003924, GO:0005774, GO:0005452, GO:0046715, GO:0080139
Pa_1_19750	GO:0016021, GO:0005886, GO:0016829, GO:0005783, GO:0006950, GO:0005743, GO:0008565, GO:0004012, GO:0045332, GO:0006869, GO:0015908
Pa_1_19760	GO:0005737, GO:0016787, GO:0016021, GO:0005488, GO:0004806, GO:0004771, GO:0016042, GO:0016491, GO:0000324, GO:0005794, GO:0006629, GO:0006696, GO:0005811, GO:0016125, GO:0016298, GO:0044255
Pa_1_19780	GO:0008270, GO:0005840, GO:0003735, GO:0006412, GO:0003676
Pa_1_19790	GO:0016491, GO:0016020, GO:0010181, GO:0015205
Pa_1_1980	GO:0005737, GO:0005829, GO:0016021, GO:0016491, GO:0055085, GO:0008061, GO:0043169, GO:0033554, GO:0034599, GO:0016620, GO:0009013, GO:0004029, GO:0008886, GO:0004568, GO:0006032, GO:0004777, GO:0006538, GO:0009450, GO:0006540
Pa_1_19800	GO:0005524, GO:0004674
Pa_1_19820	GO:0005634, GO:0005488, GO:0006364
Pa_1_19830	GO:0005737, GO:0005829, GO:0005634, GO:0003743, GO:0005515, GO:0005524, GO:0003676, GO:0005739, GO:0003723, GO:0005730, GO:0008026, GO:0004386, GO:0000184, GO:0004004, GO:0031137, GO:0006364, GO:0006397, GO:0051301, GO:0007067, GO:0071470, GO:0008380, GO:2000765, GO:0008972, GO:0009228, GO:0033592, GO:0031047
Pa_1_19840	GO:0016021, GO:0016746, GO:0005794, GO:0006810, GO:0006355, GO:0016846, GO:0016592, GO:0001104, GO:0008521, GO:0035348
Pa_1_19850	GO:0005634, GO:0051301, GO:0007059, GO:0000775
Pa_1_19860	GO:0005634, GO:0003677, GO:0005622, GO:0006508, GO:0005576, GO:0005886, GO:0003676, GO:0016020, GO:0005509, GO:0010008, GO:0018024, GO:0000166, GO:0003779, GO:0004252, GO:0046873, GO:0051301, GO:0007049, GO:0030479, GO:0006897, GO:0030036, GO:0015629, GO:0005083, GO:0008154, GO:0006461, GO:0005199, GO:0004803, GO:0015074, GO:0006313, GO:0017048
Pa_1_19870	GO:0016021, GO:0005886, GO:0003824, GO:0055085, GO:0006396, GO:0005215
Pa_1_19880	GO:0016884, GO:0016740, GO:0005737, GO:0046872, GO:0016787, GO:0005829, GO:0005634, GO:0006412, GO:0016021, GO:0005524, GO:0016829, GO:0005739, GO:0009405, GO:0016811, GO:0003755, GO:0006457, GO:0015171, GO:0004674, GO:0006355, GO:0007029, GO:0004075, GO:0004485, GO:0004039, GO:0004847, GO:0071469, GO:0019740, GO:0043419, GO:0006525, GO:0000256, GO:0050567, GO:0030956, GO:0070681, GO:0004040, GO:…
Pa_1_19900	GO:0005829, GO:0050660, GO:0008762, GO:0003677, GO:0016021, GO:0005524, GO:0003676, GO:0003723, GO:0000166, GO:0017111, GO:0030702, GO:0000070, GO:0008324, GO:0034613, GO:0031934, GO:0005721, GO:0005724, GO:0031380, GO:0031048, GO:0003968, GO:0045141, GO:0031060
Pa_1_19910	GO:0016884, GO:0005634, GO:0050660, GO:0008762, GO:0008270, GO:0016021, GO:0003700, GO:0005759, GO:0003824, GO:0055085, GO:0016614, GO:0005743, GO:0009060, GO:0006089, GO:0004871, GO:0003968, GO:0004458, GO:0044262, GO:0006091
Pa_1_19930	GO:0005840, GO:0003735, GO:0006412, GO:0003723, GO:0005730, GO:0022627, GO:0019843
Pa_1_19940	GO:0005634, GO:0003677, GO:0006355
Pa_1_19950	GO:0016740, GO:0016021, GO:0006508, GO:0009986, GO:0005576, GO:0005886, GO:0042710, GO:0005524, GO:0003824, GO:0030248, GO:0004553, GO:0042626, GO:0005975, GO:0005618, GO:0007047, GO:0031225, GO:0009277, GO:0008061, GO:0043169, GO:0016998, GO:0000324, GO:0005783, GO:0033554, GO:0004190, GO:0006950, GO:0005635, GO:0004568, GO:0006032, GO:0000282, GO:0005935, GO:0000128, GO:0001403, GO:0007124, GO:…
Pa_1_19980	GO:0004553, GO:0005975, GO:0043169, GO:0005643, GO:0006606
Pa_1_19990	GO:0005506, GO:0016705, GO:0016702, GO:0031418, GO:0016706
Pa_1_20	GO:0016787, GO:0016021, GO:0004091, GO:0005488, GO:0005576, GO:0045493, GO:0045490, GO:0016998, GO:0009279, GO:0006221, GO:0000272, GO:0046555, GO:0050318, GO:0042132, GO:0008953, GO:0003883, GO:0030600
Pa_1_2000	GO:0016021, GO:0005524, GO:0016020, GO:0016301, GO:0000155, GO:0018106, GO:0004872, GO:0006355, GO:0000156
Pa_1_20030	GO:0005737, GO:0005829, GO:0005634, GO:0042493, GO:0005488, GO:0005886, GO:0005515, GO:0005524, GO:0016192, GO:0005739, GO:0016301, GO:0009405, GO:0010008, GO:0005794, GO:0031321, GO:0006914, GO:0015031, GO:0005777, GO:0004672, GO:0005773, GO:0030448, GO:0000329, GO:0005802, GO:0016773, GO:0034271, GO:0034272, GO:0030242, GO:0006897, GO:0071470, GO:0034613, GO:0030036, GO:0030476, GO:0006646, GO:…
Pa_1_20040	GO:0003677, GO:0008270, GO:0003700, GO:0016491, GO:0005759, GO:0005739, GO:0033554, GO:0004319, GO:0006633, GO:0043565, GO:0009060, GO:0019166, GO:0016631, GO:0003960
Pa_1_20050	GO:0008270, GO:0016491
Pa_1_20060	GO:0005737, GO:0005829, GO:0005634, GO:0050660, GO:0005515, GO:0005524, GO:0043130, GO:0006355, GO:0003995, GO:0042803, GO:0000070, GO:0006950, GO:0006301, GO:0016881, GO:0000502, GO:0004842, GO:0010994, GO:0000209, GO:0008054, GO:0031371, GO:0006513, GO:0071479, GO:0070534, GO:0043162
Pa_1_20070	GO:0046872, GO:0008270, GO:0005515, GO:0005509, GO:0003779, GO:0000329, GO:0097042, GO:0035859
Pa_1_20080	GO:0005737, GO:0016787, GO:0005829, GO:0005634, GO:0033554, GO:0008677, GO:0050661, GO:0015940
Pa_1_20090	GO:0016787
Pa_1_2010	GO:0003677, GO:0008233, GO:0030261
Pa_1_20100	GO:0050660, GO:0008270, GO:0051920, GO:0020037, GO:0003995, GO:0047616, GO:0018576, GO:0008199, GO:0009712, GO:0008470, GO:0004085, GO:0004361
Pa_1_20110	GO:0016740, GO:0046872, GO:0005524, GO:0016874, GO:0004075, GO:0004485, GO:0004658, GO:0004492
Pa_1_20120	GO:0005488, GO:0016491, GO:0005625, GO:0005975, GO:0004090, GO:0008874, GO:0050085, GO:0047038, GO:0047002, GO:0019571, GO:0019528, GO:0032115, GO:0042850, GO:0050287
Pa_1_20140	GO:0005488
Pa_1_20160	GO:0005737, GO:0008270, GO:0006351, GO:0006338, GO:0006357, GO:0016575, GO:0008134, GO:0016568, GO:0031939, GO:0030174, GO:0033698, GO:0070210, GO:0035064, GO:0061188, GO:0061186, GO:0032221
Pa_1_20170	GO:0005525, GO:0005622, GO:0005739, GO:0004519, GO:0003924, GO:0005743, GO:0032543
Pa_1_20190	GO:0003677, GO:0016872, GO:0042398
Pa_1_20220	GO:0016021, GO:0005886
Pa_1_20230	GO:0006071, GO:0006508, GO:0005524, GO:0005739, GO:0016301, GO:0004190, GO:0006629, GO:0016772, GO:0004672, GO:0048197, GO:0008889
Pa_1_20240	GO:0005525, GO:0005509, GO:0051301, GO:0007049, GO:0005544, GO:0031105
Pa_1_20260	GO:0008270, GO:0005488, GO:0003824, GO:0006281, GO:0006284, GO:0006368, GO:0008023
Pa_1_20270	GO:0005737, GO:0005829, GO:0005634, GO:0005515, GO:0005524, GO:0005739, GO:0016301, GO:0006298, GO:0030983, GO:0004020, GO:0000103, GO:0019344, GO:0009086, GO:0004781
Pa_1_20280	GO:0016740, GO:0005737, GO:0016021, GO:0005488, GO:0009986, GO:0005576, GO:0005886, GO:0042710, GO:0030248, GO:0004553, GO:0005975, GO:0005618, GO:0007047, GO:0031225, GO:0009277, GO:0031505, GO:0008061, GO:0043169, GO:0000324, GO:0006457, GO:0008757, GO:0051082, GO:0006950, GO:0004568, GO:0008360, GO:0000753, GO:0000282, GO:0005935, GO:0000128, GO:0001403, GO:0007124, GO:0016272, GO:0007155, GO:…
Pa_1_20290	GO:0019120
Pa_1_20300	GO:0016021, GO:0016020, GO:0000324, GO:0005783, GO:0005794, GO:0005789, GO:0005774
Pa_1_20320	GO:0003677, GO:0006355
Pa_1_20330	GO:0005829, GO:0005488, GO:0005515, GO:0008152, GO:0006886, GO:0016192, GO:0005768, GO:0006888, GO:0030663, GO:0005198, GO:0030117, GO:0030126, GO:0006890
Pa_1_20340	GO:0016740, GO:0016021, GO:0016020, GO:0005794, GO:0005789, GO:0008654, GO:0005792, GO:0005741, GO:0006646, GO:0016780, GO:0004307, GO:0004142
Pa_1_20350	GO:0005634, GO:0003700, GO:0043565, GO:0046983, GO:0003725
Pa_1_20360	GO:0016021, GO:0004872, GO:0006457, GO:0006810, GO:0005789, GO:0009272, GO:0018576, GO:0008199, GO:0009712, GO:0015230
Pa_1_20370	GO:0050660, GO:0005506, GO:0051920, GO:0016702, GO:0003995, GO:0006725, GO:0018576, GO:0008199, GO:0009712, GO:0018581, GO:0019615, GO:0033751
Pa_1_20380	GO:0005737, GO:0005829, GO:0005634, GO:0008168, GO:0008033, GO:0016300
Pa_1_20390	GO:0005829, GO:0005634, GO:0003743, GO:0006417, GO:0043614
Pa_1_2040	GO:0016884, GO:0016740, GO:0016787, GO:0051287, GO:0016616, GO:0005488, GO:0006355, GO:0007165, GO:0030411, GO:0006582
Pa_1_20410	GO:0006886, GO:0015450, GO:0005744
Pa_1_20420	GO:0016021, GO:0055085, GO:0016020, GO:0005215, GO:0006814
Pa_1_20430	GO:0003676, GO:0000166
Pa_1_20440	GO:0016491, GO:0051082, GO:0005747, GO:0006120, GO:0006461
Pa_1_20490	GO:0005737, GO:0016857, GO:0019299
Pa_1_2050	GO:0005737, GO:0016787, GO:0005509, GO:0004555, GO:0005991, GO:0005993
Pa_1_20500	GO:0006508, GO:0009055, GO:0045454, GO:0015035, GO:0006662, GO:0008234
Pa_1_20510	GO:0016021, GO:0008643, GO:0055085, GO:0004553, GO:0005975, GO:0043169
Pa_1_20540	GO:0005737, GO:0005829, GO:0008270, GO:0016491, GO:0005759, GO:0005524, GO:0003676, GO:0005739, GO:0002181, GO:0004812, GO:0004832, GO:0006438, GO:0032543, GO:0004822, GO:0006428
Pa_1_20550	GO:0008270
Pa_1_20560	GO:0003743, GO:0005488, GO:0005515, GO:0016020, GO:0042802, GO:0030071, GO:0016567, GO:0051301, GO:0007067, GO:0005315, GO:0005680, GO:0031145, GO:0008054
Pa_1_20570	GO:0022904, GO:0004129, GO:0006091, GO:0005751, GO:0044238, GO:0006119
Pa_1_20580	GO:0005634, GO:0003677, GO:0005622, GO:0008270, GO:0016829, GO:0004518, GO:0006281, GO:0004519, GO:0006284, GO:0003906, GO:0008311, GO:0008081, GO:0004527, GO:0004528, GO:0008853, GO:0034614
Pa_1_20590	GO:0005634, GO:0003677, GO:0006355, GO:0006351, GO:0007338
Pa_1_206	GO:0005737, GO:0051287, GO:0005488, GO:0006520, GO:0016620
Pa_1_2060	GO:0005829, GO:0005634, GO:0003700, GO:0030170, GO:0016829, GO:0045329, GO:0006520, GO:0043565, GO:0008784, GO:0004793, GO:0009403, GO:0008732, GO:0006545, GO:0006567
Pa_1_20600	GO:0008270, GO:0016021, GO:0005886, GO:0003676, GO:0032153, GO:0030276, GO:0000131, GO:0031505, GO:0003779, GO:0030448, GO:0007015, GO:0051519, GO:0030118, GO:0005545, GO:0048268, GO:0005543, GO:0030479, GO:0006897, GO:0007155, GO:0005934, GO:0043332, GO:0007121, GO:0034613, GO:0051666, GO:0015629, GO:0070314, GO:0006887, GO:0051285, GO:0000086, GO:0030674, GO:0030866, GO:0030950, GO:0005200, GO:…
Pa_1_20610	GO:0005737, GO:0005829, GO:0005634, GO:0005515, GO:0006914, GO:0015031, GO:0006995, GO:0032258, GO:0034727, GO:0006612, GO:0000422, GO:0000045, GO:0019776, GO:0006501
Pa_1_20620	GO:0016740, GO:0005634, GO:0003677, GO:0005622, GO:0008270, GO:0008080, GO:0003676, GO:0016874, GO:0006289, GO:0003684, GO:0006397, GO:0005681, GO:0045292, GO:0008380, GO:0043161, GO:0016074, GO:0005684, GO:0034247
Pa_1_20630	GO:0000226, GO:0016020, GO:0005739, GO:0005934, GO:0000266, GO:0000001, GO:0005938, GO:0015631, GO:0030473
Pa_1_20650	GO:0046872, GO:0005829, GO:0005634, GO:0003677, GO:0005515, GO:0006260, GO:0003676, GO:0005739, GO:0006278, GO:0000166, GO:0006289, GO:0043596, GO:0000723, GO:0006298, GO:0043504, GO:0006284, GO:0007346, GO:0003887, GO:0070987, GO:0042276, GO:0006301, GO:0006271, GO:0006272, GO:0004527, GO:0004871, GO:0006270, GO:0033314, GO:0003688, GO:0000084, GO:0006269, GO:0000734, GO:0016035, GO:0019985, GO:…
Pa_1_20660	GO:0008270, GO:0005840, GO:0003735, GO:0006412, GO:0003676, GO:0003779, GO:0006397, GO:0005543, GO:0005681, GO:0008380, GO:0000350
Pa_1_20670	GO:0005840, GO:0003735, GO:0006412, GO:0042254, GO:0003723, GO:0005730, GO:0015935, GO:0022627, GO:0002181, GO:0000462, GO:0006364, GO:0032040, GO:0030686, GO:0019843, GO:0045903
Pa_1_20680	GO:0005840, GO:0003735, GO:0006412, GO:0015935, GO:0002181, GO:0022625, GO:0019843
Pa_1_2070	GO:0005634, GO:0003677, GO:0008270, GO:0003700, GO:0006351
Pa_1_20700	GO:0016021, GO:0005488, GO:0005886, GO:0016020, GO:0033554, GO:0005789
Pa_1_20720	GO:0005829, GO:0005634, GO:0000287, GO:0006357, GO:0004622, GO:0016791, GO:0016592, GO:0001104, GO:0009117, GO:0046470, GO:0050483, GO:0006190, GO:0071590, GO:0071592
Pa_1_20760	GO:0005829, GO:0016021, GO:0042493, GO:0005515, GO:0005524, GO:0032153, GO:0051286, GO:0016301, GO:0005794, GO:0033554, GO:0004674, GO:0015031, GO:0007165, GO:0004672, GO:0051301, GO:0007049, GO:0051519, GO:0006470, GO:0031138, GO:0034613, GO:0046020, GO:0004683, GO:0030003, GO:0006808, GO:0071473, GO:0042391, GO:0015696, GO:0004702, GO:0034763
Pa_1_20770	GO:0005737, GO:0005525, GO:0005829, GO:0005634, GO:0005622, GO:0005488, GO:0003676, GO:0055085, GO:0006886, GO:0016020, GO:0004872, GO:0005643, GO:0008565, GO:0005635, GO:0007264, GO:0006606, GO:0006406
Pa_1_20790	GO:0046872, GO:0005634, GO:0005622, GO:0008270, GO:0005515, GO:0006260, GO:0006281, GO:0016746, GO:0043596, GO:0003684, GO:0003887, GO:0005657, GO:0070987, GO:0042276, GO:0000790, GO:0007031, GO:0005778, GO:0034087, GO:0019985, GO:0006473, GO:0034182
Pa_1_2080	GO:0035091, GO:0007154
Pa_1_20800	GO:0016740, GO:0008270, GO:0016021, GO:0016746, GO:0005794, GO:0005774, GO:0000329, GO:0042144, GO:0090002, GO:0019706, GO:0018345
Pa_1_20810	GO:0005622, GO:0008270, GO:0009055
Pa_1_20820	GO:0005737, GO:0005525, GO:0005634, GO:0003677, GO:0008270, GO:0008168, GO:0018024, GO:0030437, GO:0006355, GO:0006351, GO:0045128, GO:0000790, GO:0006357, GO:0006354, GO:0006368, GO:0060195, GO:0016575, GO:0005694, GO:0016591, GO:0030174, GO:0046975, GO:0035066
Pa_1_20830	GO:0005829, GO:0003676, GO:0003723, GO:0030490, GO:0030529, GO:0008033, GO:0046540, GO:0045292, GO:0005688, GO:0006402
Pa_1_20840	GO:0005737, GO:0046872, GO:0005829, GO:0005634, GO:0008270, GO:0016021, GO:0005515, GO:0005524, GO:0003676, GO:0016301, GO:0016772, GO:0004672, GO:0006301, GO:0006397, GO:0031966, GO:0031124, GO:0031251
Pa_1_20850	GO:0005737, GO:0005515, GO:0005783, GO:0033554, GO:0043161
Pa_1_20860	GO:0005622, GO:0006886
Pa_1_20890	GO:0005737, GO:0005634, GO:0004619, GO:0050278, GO:0046390, GO:0004799, GO:0006231
Pa_1_2090	GO:0016740, GO:0016021, GO:0022857, GO:0004806, GO:0006508, GO:0016746, GO:0008233, GO:0006629, GO:0016603
Pa_1_20900	GO:0005634, GO:0003677, GO:0008270, GO:0003700, GO:0005199
Pa_1_20920	GO:0008168
Pa_1_20930	GO:0016757, GO:0004221, GO:0006511, GO:0005654, GO:0008234, GO:0000502, GO:0043161, GO:0005838, GO:0004843, GO:0071947, GO:0016579
Pa_1_20940	GO:0005829, GO:0005634, GO:0042493, GO:0003779, GO:0030479, GO:0006897, GO:0000147, GO:0030041, GO:0000001, GO:0005856, GO:0005198, GO:0005885, GO:0034314
Pa_1_20950	GO:0003676, GO:0000166
Pa_1_20960	GO:0005829, GO:0005634, GO:0016021, GO:0005488, GO:0005886, GO:0055085, GO:0006886, GO:0005739, GO:0005509, GO:0006810, GO:0007165, GO:0005743, GO:0006839, GO:0051724, GO:0005477, GO:0006850, GO:0005507, GO:0005741, GO:0015450, GO:0000002, GO:0008131, GO:0048038, GO:0009308, GO:0015218, GO:0005578
Pa_1_20970	GO:0005829, GO:0005634, GO:0006886, GO:0015031, GO:0035091, GO:0007154, GO:0000139, GO:0031902, GO:0032266, GO:0034499
Pa_1_20980	GO:0005840, GO:0003735, GO:0006412, GO:0003723, GO:0006396, GO:0005681, GO:0045292, GO:0003899, GO:0005686
Pa_1_20990	GO:0016740, GO:0016021, GO:0042493, GO:0005886, GO:0005515, GO:0016757, GO:0016020, GO:0031505, GO:0009405, GO:0005789, GO:0030448, GO:0044011, GO:0031965, GO:0000032, GO:0006493, GO:0046982, GO:0000030, GO:0004169, GO:0031502, GO:0000752, GO:0071937, GO:0035269, GO:0045861, GO:0032527
Pa_1_210	GO:0005829, GO:0008270, GO:0005773
Pa_1_2100	GO:0016740, GO:0016021, GO:0016020, GO:0005794, GO:0005789, GO:0008654, GO:0005792, GO:0005741, GO:0006646, GO:0016780, GO:0004307, GO:0004142, GO:0003882
Pa_1_21020	GO:0008270, GO:0004806, GO:0016491, GO:0006629
Pa_1_21030	GO:0016740, GO:0005737, GO:0005634, GO:0005622, GO:0008080, GO:0009405, GO:0007165, GO:0006099, GO:0045239, GO:0004333, GO:0006106, GO:0004343, GO:0006048
Pa_1_21060	GO:0016740, GO:0005488, GO:0016491, GO:0008874, GO:0004303, GO:0004316, GO:0047038, GO:0008678, GO:0008670
Pa_1_21070	GO:0005829, GO:0008270, GO:0016491, GO:0004022, GO:0005524, GO:0033554, GO:0000166, GO:0046526, GO:0042732, GO:0017111, GO:0015986, GO:0000276, GO:0015078, GO:0003939, GO:0019318, GO:0019407, GO:0050019
Pa_1_21080	GO:0005737, GO:0016787, GO:0005829, GO:0005634, GO:0008270, GO:0016021, GO:0022891, GO:0042493, GO:0016491, GO:0006096, GO:0005524, GO:0033554, GO:0008106, GO:0004090, GO:0003729, GO:0004396, GO:0004032, GO:0019568, GO:0042843, GO:0047935, GO:0005623, GO:0047956
Pa_1_21090	GO:0016021, GO:0006886, GO:0016192, GO:0016020, GO:0015031, GO:0000139, GO:0006888, GO:0005801, GO:0005484, GO:0006891, GO:0031201, GO:0048280
Pa_1_21110	GO:0005737, GO:0005634, GO:0003677, GO:0003743, GO:0005622, GO:0008270, GO:0003700, GO:0005488, GO:0006886, GO:0006281, GO:0006355, GO:0042803, GO:0006351, GO:0005669, GO:0000228, GO:0043565, GO:0006338, GO:0000785, GO:0006357, GO:0006352, GO:0016592, GO:0001104, GO:0016568, GO:0042162
Pa_1_21113	GO:0008171
Pa_1_21116	GO:0005622, GO:0008270
Pa_1_21120	GO:0005622, GO:0006886, GO:0032153, GO:0051286, GO:0006887, GO:0005085
Pa_1_21130	GO:0005737, GO:0031505, GO:0009405, GO:0003779, GO:0030702, GO:0000723, GO:0030448, GO:0007346, GO:0006348, GO:0007163, GO:0006974, GO:0030479, GO:0006897, GO:0043332, GO:0031097, GO:0051666, GO:0051285, GO:0060988, GO:0051020
Pa_1_21160	GO:0005634, GO:0008270, GO:0003700
Pa_1_21170	GO:0016787, GO:0008270
Pa_1_21180	GO:0016021, GO:0055085, GO:0016020, GO:0005215, GO:0000139
Pa_1_21190	GO:0005524, GO:0003777, GO:0017111, GO:0007018
Pa_1_2120	GO:0004579, GO:0008250, GO:0018279
Pa_1_21230	GO:0004725
Pa_1_21240	GO:0004725
Pa_1_21260	GO:0005737, GO:0032153, GO:0031505, GO:0016301, GO:0009405, GO:0006355, GO:0042803, GO:0030448, GO:0034599, GO:0000156, GO:0007346, GO:0031098, GO:0046685, GO:0020012, GO:0007234, GO:0034605, GO:0060258, GO:0070301, GO:0031435, GO:0030295, GO:0000167, GO:0031954
Pa_1_21270	GO:0016772
Pa_1_21290	GO:0046872, GO:0016702, GO:0004411, GO:0006559, GO:0006570, GO:0006572
Pa_1_2130	GO:0016021, GO:0005886, GO:0055085, GO:0005215
Pa_1_21300	GO:0016787, GO:0005829, GO:0005634, GO:0005622, GO:0008270, GO:0016021, GO:0008080, GO:0005488, GO:0005515, GO:0005524, GO:0003676, GO:0006886, GO:0005816, GO:0016020, GO:0015031, GO:0005643, GO:0005789, GO:0012507, GO:0003779, GO:0005777, GO:0042802, GO:0006950, GO:0008565, GO:0000139, GO:0006888, GO:0034613, GO:0006606, GO:0016459, GO:0003774, GO:0005856, GO:0004871, GO:0048280, GO:0048211, GO:…
Pa_1_21310	GO:0005634, GO:0003677, GO:0008270, GO:0003700
Pa_1_21340	GO:0005634, GO:0003677, GO:0008270, GO:0005524, GO:0004674, GO:0006351, GO:0004672
Pa_1_21360	GO:0016787, GO:0005576, GO:0030248, GO:0004553, GO:0005975, GO:0016788, GO:0006629, GO:0035556, GO:0004629
Pa_1_21380	GO:0003824, GO:0030246, GO:0016052
Pa_1_2140	GO:0003677, GO:0016021, GO:0005524, GO:0042626, GO:0016887, GO:0008094, GO:0006259, GO:0034599, GO:0005743, GO:0000329, GO:0006879, GO:0005381, GO:0008324, GO:0034634, GO:0071276, GO:0055072, GO:0006811, GO:0070574, GO:0071585, GO:0008559, GO:0015086, GO:0071996, GO:0071995
Pa_1_21400	GO:0005634, GO:0003677, GO:0005515, GO:0006355, GO:0006351, GO:0000978, GO:0071456, GO:0071458, GO:0032936, GO:0010629, GO:0072592, GO:0070452, GO:0070455, GO:0071073, GO:0035104, GO:0010630, GO:0008202
Pa_1_21410	GO:0046872, GO:0050660, GO:0005576, GO:0003824, GO:0030248, GO:0004553, GO:0030245, GO:0030246, GO:0016614, GO:0016052, GO:0047735
Pa_1_21430	GO:0016787, GO:0004091, GO:0005576, GO:0030248, GO:0004553, GO:0030245, GO:0005975, GO:0050525, GO:0046555
Pa_1_21440	GO:0004497, GO:0009055, GO:0020037, GO:0016705
Pa_1_21450	GO:0003677, GO:0016491, GO:0006508, GO:0004553, GO:0005975, GO:0008061, GO:0043169, GO:0016998, GO:0006355, GO:0004252, GO:0016620, GO:0004568, GO:0006032, GO:0004491
Pa_1_21460	GO:0050660, GO:0008762, GO:0016491, GO:0003824, GO:0009055, GO:0020037, GO:0016705, GO:0004553, GO:0005975, GO:0008061, GO:0043169, GO:0045493, GO:0016998, GO:0016810
Pa_1_2150	GO:0050660, GO:0005759, GO:0005886, GO:0005524, GO:0006886, GO:0004872, GO:0016627, GO:0015450, GO:0030674, GO:0051087, GO:0005744, GO:0001405, GO:0030150
Pa_1_21500	GO:0016787, GO:0008270, GO:0003824
Pa_1_21540	GO:0005524, GO:0017111
Pa_1_21560	GO:0003677, GO:0005524, GO:0008233, GO:0017111
Pa_1_21570	GO:0008168
Pa_1_2160	GO:0005634, GO:0003677, GO:0005840, GO:0003735, GO:0006412, GO:0016021, GO:0035091, GO:0007154, GO:0005763
Pa_1_21610	GO:0005488, GO:0016491
Pa_1_21640	GO:0005488, GO:0005524, GO:0006915, GO:0005871, GO:0003777, GO:0017111
Pa_1_21650	GO:0009116, GO:0005488, GO:0005524, GO:0003824, GO:0017111
Pa_1_21670	GO:0005622, GO:0008270
Pa_1_21690	GO:0046872, GO:0009116, GO:0005622, GO:0016021, GO:0005524, GO:0003676, GO:0055085, GO:0016301, GO:0000287, GO:0000324, GO:0004674, GO:0005789, GO:0005215, GO:0005774, GO:0000329, GO:0008324, GO:0004527, GO:0006874, GO:0004749, GO:0009156, GO:0015369, GO:0015386, GO:0015085, GO:0003968
Pa_1_21695	GO:0005488
Pa_1_2170	GO:0016021, GO:0005524, GO:0008237, GO:0007005, GO:0008233, GO:0017111, GO:0016226, GO:0005743, GO:0016773, GO:0051301, GO:0009060, GO:0043623, GO:0051131, GO:0042623
Pa_1_21700	GO:0046872, GO:0008270, GO:0016021, GO:0003700, GO:0016491, GO:0004497, GO:0008061, GO:0015171, GO:0043565, GO:0004503, GO:0004097
Pa_1_21720	GO:0016021, GO:0006810
Pa_1_21730	GO:0005622, GO:0008270, GO:0003676
Pa_1_21740	GO:0006508, GO:0008168, GO:0003676, GO:0004252
Pa_1_21750	GO:0016702, GO:0016846, GO:0045735, GO:0035091, GO:0007154, GO:0047922
Pa_1_21760	GO:0016846
Pa_1_21770	GO:0016787, GO:0005634, GO:0003677, GO:0008270, GO:0016021, GO:0003824, GO:0016829, GO:0055085, GO:0006281, GO:0006355, GO:0006351, GO:0016853, GO:0018800, GO:0008704
Pa_1_21780	GO:0005737, GO:0005829, GO:0005634, GO:0050660, GO:0008270, GO:0016491, GO:0004022, GO:0005759, GO:0005625, GO:0005975, GO:0000287, GO:0034599, GO:0032440, GO:0016868, GO:0003960, GO:0017091, GO:0035925, GO:0016071, GO:0050111
Pa_1_21790	GO:0005737, GO:0016787, GO:0016772, GO:0008806
Pa_1_21800	GO:0050660, GO:0016614
Pa_1_21810	GO:0016740, GO:0005634, GO:0003677, GO:0008270, GO:0003700, GO:0009277, GO:0016788, GO:0016846, GO:0006351, GO:0005199
Pa_1_21820	GO:0016787, GO:0004104, GO:0004091, GO:0004806, GO:0016042, GO:0008203
Pa_1_21830	GO:0003824, GO:0016702, GO:0006725, GO:0055114, GO:0008198
Pa_1_21840	GO:0016491, GO:0004497, GO:0003676, GO:0016020, GO:0005215, GO:0006857
Pa_1_21850	GO:0005488, GO:0005524, GO:0004674, GO:0000902
Pa_1_21860	GO:0005525, GO:0003743, GO:0005622, GO:0005524, GO:0004674, GO:0006355, GO:0017111, GO:0003924, GO:0007049, GO:0008134
Pa_1_21890	GO:0005622, GO:0006508, GO:0004198
Pa_1_2190	GO:0005743, GO:0070469, GO:0008121, GO:0005750, GO:0006122, GO:0005740, GO:0044238
Pa_1_21900	GO:0016787, GO:0005576, GO:0030248, GO:0004553, GO:0030245, GO:0008810, GO:0005975, GO:0008061
Pa_1_21910	GO:0016740, GO:0004364
Pa_1_21920	GO:0005634, GO:0003677, GO:0008270, GO:0003700, GO:0005778
Pa_1_21930	GO:0005488
Pa_1_21940	GO:0005634, GO:0003677, GO:0008270, GO:0003700, GO:0006351
Pa_1_21950	GO:0004497, GO:0016702, GO:0050054
Pa_1_21960	GO:0050660, GO:0008762, GO:0005777, GO:0015945, GO:0018695, GO:0018465
Pa_1_21970	GO:0050660, GO:0006508, GO:0004190, GO:0008812, GO:0006066, GO:0016614, GO:0047682, GO:0000166, GO:0047639, GO:0005777, GO:0015945, GO:0050288
Pa_1_21980	GO:0005634, GO:0003700, GO:0043565, GO:0046983, GO:0006986
Pa_1_220	GO:0005634, GO:0005739
Pa_1_2200	GO:0005737, GO:0005634, GO:0008270, GO:0005515, GO:0030447, GO:0016874, GO:0010570, GO:0006368, GO:0008023, GO:0043161, GO:0008121, GO:0006122, GO:0004842, GO:0071629, GO:0000209, GO:0031144, GO:0030163, GO:0006513, GO:0005740, GO:0090089, GO:0071596
Pa_1_22000	GO:0015031
Pa_1_22010	GO:0005829, GO:0003677, GO:0016491, GO:0005515, GO:0005524, GO:0003676, GO:0003723, GO:0005730, GO:0008026, GO:0004386, GO:0004004, GO:0070478, GO:0003887, GO:0006364, GO:0006417, GO:0003724, GO:0000467, GO:0071042, GO:0071035, GO:0071038, GO:0070481, GO:0071051, GO:2000765, GO:0009615, GO:0034475, GO:0016818, GO:0006402, GO:0034476, GO:0008143, GO:0055087, GO:0031499, GO:0034459, GO:0043629, GO:…
Pa_1_22020	GO:0005634, GO:0006281, GO:0007126, GO:0007049, GO:0006974, GO:0048478
Pa_1_22030	GO:0016021, GO:0005515, GO:0009055, GO:0006810, GO:0005743, GO:0005747, GO:0008137, GO:0006917, GO:0006120, GO:0030308, GO:0072593, GO:0003954, GO:0044238
Pa_1_22040	GO:0016787, GO:0005576, GO:0030248, GO:0004553, GO:0030245, GO:0008810, GO:0005975, GO:0008061, GO:0016798
Pa_1_2205	GO:0005737, GO:0005829, GO:0005634, GO:0005515, GO:0006281, GO:0003755, GO:0007165, GO:0016853, GO:0006970, GO:0006282, GO:0030472, GO:0000082, GO:0000159, GO:0008601, GO:0007052, GO:0019211, GO:0072543, GO:0000267, GO:0060236, GO:0043618
Pa_1_22050	GO:0005488, GO:0016491, GO:0016772
Pa_1_22060	GO:0016787, GO:0009116, GO:0003677, GO:0008270, GO:0005488, GO:0006508, GO:0005524, GO:0003824, GO:0006886, GO:0005975, GO:0043169, GO:0003723, GO:0030976, GO:0030246, GO:0004190, GO:0003964, GO:0006278, GO:0031227, GO:0016788, GO:0006505, GO:0006629, GO:0016702, GO:0006725, GO:0004565, GO:0009341, GO:0008199
Pa_1_22070	GO:0005634, GO:0003677, GO:0008270, GO:0003700, GO:0006508, GO:0008237, GO:0006351
Pa_1_22080	GO:0005622, GO:0008270
Pa_1_22090	GO:0005737, GO:0051287, GO:0008168, GO:0003723, GO:0000287, GO:0009098, GO:0004809, GO:0003862
Pa_1_2210	GO:0016787, GO:0003723, GO:0006396, GO:0005730, GO:0070478, GO:0000177, GO:0000176, GO:0000467, GO:0070651, GO:0071042, GO:0071035, GO:0071038, GO:0070481, GO:0071051
Pa_1_22100	GO:0046872, GO:0005524, GO:0016874
Pa_1_22110	GO:0016021, GO:0005886, GO:0016020, GO:0030428
Pa_1_22120	GO:0005488, GO:0016491, GO:0003676, GO:0016020, GO:0000166, GO:0008874, GO:0008709, GO:0004316
Pa_1_22130	GO:0030437, GO:0006355, GO:0006950, GO:0045944, GO:0016575, GO:0070210, GO:0032221
Pa_1_22140	GO:0008270, GO:0003676, GO:0016874
Pa_1_22150	GO:0005576, GO:0030248, GO:0004553, GO:0005975, GO:0016798
Pa_1_22160	GO:0016787, GO:0005634, GO:0003677, GO:0008270, GO:0003700, GO:0050490, GO:0004341
Pa_1_22170	GO:0016787, GO:0005829, GO:0005634, GO:0016021, GO:0050662, GO:0005488, GO:0016491, GO:0003824, GO:0030170, GO:0008168, GO:0003676, GO:0055085, GO:0045490, GO:0033554, GO:0016788, GO:0006629, GO:0044237, GO:0006520, GO:0003854, GO:0006694, GO:0016853, GO:0016831, GO:0045551, GO:0046575
Pa_1_22180	GO:0005634, GO:0003677, GO:0008270, GO:0003700
Pa_1_22185	GO:0016021, GO:0009986, GO:0005576, GO:0003824, GO:0004553, GO:0005975, GO:0005618, GO:0016020, GO:0043169, GO:0004872, GO:0004386, GO:0007155
Pa_1_22190	GO:0016021, GO:0042493, GO:0005488, GO:0005515, GO:0009636, GO:0016746, GO:0007126, GO:0005789, GO:0005773, GO:0007035, GO:0001302, GO:0034605, GO:0030176, GO:0008610, GO:0050291, GO:0046513, GO:0071277, GO:0071294, GO:0007009, GO:0070072
Pa_1_2220	GO:0005737, GO:0046872, GO:0005829, GO:0005634, GO:0005759, GO:0005524, GO:0033554, GO:0034599, GO:0006879, GO:0003951, GO:0042736, GO:0006741, GO:0019674
Pa_1_22200	GO:0005737, GO:0005634, GO:0005622, GO:0008270, GO:0042493, GO:0005515, GO:0003676, GO:0003723, GO:0000166, GO:0006397, GO:0000349, GO:0005681, GO:0006406, GO:0005686, GO:0000245, GO:0070274
Pa_1_22210	GO:0005829, GO:0000324, GO:0005794, GO:0006914, GO:0015031, GO:0006995, GO:0016236, GO:0035091, GO:0005774, GO:0000329, GO:0000300, GO:0034727, GO:0031902, GO:0030659, GO:0080025, GO:0034045, GO:0042594, GO:0070772
Pa_1_22220	GO:0005525, GO:0005829, GO:0005634, GO:0005622, GO:0005515, GO:0005524, GO:0032153, GO:0016020, GO:0031505, GO:0009405, GO:0000747, GO:0006355, GO:0030435, GO:0017111, GO:0030448, GO:0000902, GO:0051301, GO:0007067, GO:0030428, GO:0007049, GO:0000910, GO:0005935, GO:0005545, GO:0043332, GO:0030010, GO:0001410, GO:0000920, GO:0005628, GO:0005619, GO:0008134, GO:0040023, GO:0005200, GO:0005940, GO:…
Pa_1_22230	GO:0008270, GO:0003676, GO:0000287, GO:0005730, GO:0004523, GO:0006401
Pa_1_22240	GO:0016021, GO:0005739, GO:0004872, GO:0000324, GO:0005783, GO:0006915, GO:0005774, GO:0000329, GO:0000139, GO:0019722, GO:0030968
Pa_1_22250	GO:0003774
Pa_1_22260	GO:0003824
Pa_1_22270	GO:0005576
Pa_1_22280	GO:0006810, GO:0005743, GO:0005758, GO:0022900, GO:0005747, GO:0008137, GO:0006120, GO:0070469, GO:0003954, GO:0044238
Pa_1_22290	GO:0005829, GO:0005488, GO:0005643, GO:0007346, GO:0031965, GO:0006407
Pa_1_2230	GO:0005634, GO:0008270, GO:0003700, GO:0043565
Pa_1_22300	GO:0006730, GO:0016787, GO:0030170, GO:0016829, GO:0005739, GO:0006520, GO:0032440, GO:0004047, GO:0006546, GO:0005960, GO:0019464, GO:0004375, GO:0006544
Pa_1_22310	GO:0005829, GO:0005634, GO:0003824, GO:0000027, GO:0022626
Pa_1_22340	GO:0005576, GO:0005886, GO:0042710, GO:0005618, GO:0031225, GO:0005935, GO:0000128, GO:0001403, GO:0007124, GO:0016706
Pa_1_22350	GO:0016740, GO:0005737, GO:0005634, GO:0008270, GO:0016491, GO:0004022, GO:0006067, GO:0006116, GO:0005759, GO:0005625, GO:0001950, GO:0019170, GO:0043458, GO:0009986, GO:0005576, GO:0030446, GO:0005886, GO:0030445, GO:0005515, GO:0042710, GO:0006096, GO:0044416, GO:0008926, GO:0000287, GO:0030976, GO:0000947
Pa_1_22360	GO:0000166
Pa_1_22370	GO:0048315, GO:0030435, GO:0007275
Pa_1_22410	GO:0008270, GO:0005524
Pa_1_22420	GO:0008270, GO:0005524, GO:0003676, GO:0017111, GO:0016887
Pa_1_22440	GO:0050660, GO:0005488, GO:0016491, GO:0031227, GO:0050661, GO:0004499
Pa_1_22450	GO:0005634, GO:0005488, GO:0003676, GO:0003723, GO:0005730, GO:0030529, GO:0006364, GO:0005732, GO:0030532, GO:0000154
Pa_1_22460	GO:0016021, GO:0042493, GO:0005524, GO:0016197, GO:0010008, GO:0000329, GO:0000139, GO:0001403, GO:0007124, GO:0005283, GO:0016881, GO:0006878
Pa_1_22470	GO:0006357, GO:0016592, GO:0001104
Pa_1_22490	GO:0016740, GO:0005634, GO:0016021, GO:0006281, GO:0005789, GO:0008081, GO:0016758, GO:0004583, GO:0006488
Pa_1_2250	GO:0005576, GO:0016829, GO:0004553, GO:0005975, GO:0008061, GO:0043169, GO:0016998, GO:0004568, GO:0006032
Pa_1_22510	GO:0005488
Pa_1_22520	GO:0046654, GO:0046872, GO:0046656, GO:0005829, GO:0005524, GO:0005739, GO:0016301, GO:0031966, GO:0009396, GO:0003848, GO:0004156, GO:0004150, GO:0042558
Pa_1_22530	GO:0016702, GO:0004318, GO:0006207, GO:0018580, GO:0004152
Pa_1_22550	GO:0009405, GO:0005783
Pa_1_22560	GO:0005737, GO:0005829, GO:0005622, GO:0005625, GO:0005886, GO:0005515, GO:0003824, GO:0032153, GO:0000131, GO:0005509, GO:0015031, GO:0005624, GO:0006888, GO:0005935, GO:0005934, GO:0006887, GO:0005097, GO:0005798
Pa_1_22570	GO:0016740, GO:0005634, GO:0003677, GO:0003743, GO:0005622, GO:0008270, GO:0016757, GO:0006281, GO:0006355, GO:0042803, GO:0006351, GO:0005669, GO:0000228, GO:0006338, GO:0000785, GO:0006357, GO:0006352, GO:0016592, GO:0001104, GO:0016568, GO:0003712, GO:0007275, GO:0042162
Pa_1_22580	GO:0005975, GO:0043169, GO:0016788, GO:0006629, GO:0004563
Pa_1_22590	GO:0005829, GO:0005634, GO:0005622, GO:0016491, GO:0030170, GO:0008483, GO:0009058, GO:0000105, GO:0016769, GO:0004400, GO:0016847, GO:0010045
Pa_1_2260	GO:0046872, GO:0005829, GO:0005634, GO:0003677, GO:0005622, GO:0004222, GO:0006508, GO:0006281, GO:0005635, GO:0003887, GO:0030433, GO:0030674, GO:0007103, GO:0031593, GO:0042177, GO:0030474
Pa_1_22600	GO:0016787, GO:0008270, GO:0042493, GO:0016491, GO:0005576, GO:0005886, GO:0003824, GO:0009055, GO:0020037, GO:0005618, GO:0007047, GO:0031225, GO:0009277, GO:0031505, GO:0046658, GO:0005783, GO:0016712, GO:0016052, GO:0030448, GO:0009272, GO:0005624, GO:0007124, GO:0046379, GO:0007117, GO:0008496, GO:0031362, GO:0051692
Pa_1_22620	GO:0016021, GO:0005216
Pa_1_22630	GO:0005634, GO:0003735, GO:0006412, GO:0016491, GO:0005524, GO:0005739, GO:0006355, GO:0015934, GO:0007131, GO:0016853, GO:0006261, GO:0070683, GO:0006271, GO:0007076, GO:0006406, GO:0006312, GO:0005694, GO:0000795, GO:0006333, GO:0003918, GO:0006265, GO:0000712, GO:0009330, GO:0000819, GO:0006325, GO:0042790, GO:0097047, GO:0031055, GO:0000019, GO:0097046
Pa_1_22640	GO:0003677, GO:0003700, GO:0008168
Pa_1_22650	GO:0005737, GO:0005829, GO:0005634, GO:0005840, GO:0003735, GO:0006412, GO:0042493, GO:0005488, GO:0006457, GO:0031072, GO:0030544, GO:0051879
Pa_1_22660	GO:0003677, GO:0016021, GO:0008643, GO:0005886, GO:0055085, GO:0005215, GO:0000329, GO:0015450, GO:0004035
Pa_1_22670	GO:0005737, GO:0046872, GO:0005634, GO:0004437, GO:0008934, GO:0046855, GO:0019630
Pa_1_22680	GO:0003993
Pa_1_22690	GO:0016021, GO:0005576, GO:0016829, GO:0055085, GO:0009277, GO:0030287, GO:0009897, GO:0003993, GO:0016158, GO:0008707
Pa_1_22710	GO:0016021, GO:0005886, GO:0005515, GO:0055085, GO:0004872, GO:0008565, GO:0031207, GO:0006620, GO:0030176, GO:0031204
Pa_1_22720	GO:0005634, GO:0016021, GO:0006281, GO:0016020, GO:0017005, GO:0008081, GO:0015297, GO:0004527, GO:0016758, GO:0015238, GO:0000012
Pa_1_22730	GO:0016021, GO:0009055, GO:0005794, GO:0005789, GO:0045454, GO:0016853, GO:0000139, GO:0015035, GO:0006662, GO:0003756, GO:0030433, GO:0006621
Pa_1_22740	GO:0008080
Pa_1_22750	GO:0005829, GO:0016042, GO:0003824, GO:0005768, GO:0009405, GO:0031321, GO:0007126, GO:0030448, GO:0035091, GO:0007154, GO:0000753, GO:0046488, GO:0006887, GO:0005628, GO:0048015, GO:0032266, GO:0070290, GO:0004630, GO:0006644
Pa_1_22760	GO:0000062
Pa_1_22770	GO:0050660, GO:0016491
Pa_1_22780	GO:0005886, GO:0005509, GO:0010008, GO:0003779, GO:0007015, GO:0030479, GO:0006897, GO:0043332, GO:0007121, GO:0000147, GO:0030476, GO:0003993
Pa_1_2280	GO:0005737, GO:0005829, GO:0005634, GO:0016779, GO:0032440, GO:0006048, GO:0003977
Pa_1_22800	GO:0016757, GO:0016020
Pa_1_22820	GO:0005739, GO:0003723, GO:0031965, GO:0004809, GO:0005637
Pa_1_22830	GO:0003993, GO:0004143, GO:0007205
Pa_1_22840	GO:0005634, GO:0008270, GO:0016021, GO:0022891, GO:0008643, GO:0003700, GO:0005886, GO:0003676, GO:0004872, GO:0009405, GO:0007165, GO:0030448, GO:0009749, GO:0005353, GO:0005355, GO:0015578, GO:0008646, GO:0005536, GO:0051594, GO:0015755, GO:0015758, GO:0015761, GO:0045835, GO:0019660
Pa_1_22850	GO:0016740, GO:0005634, GO:0008080, GO:0042493, GO:0006355, GO:0006351, GO:0007131, GO:0000790, GO:0006338, GO:0006357, GO:0032968, GO:0000124, GO:0046695, GO:0000775, GO:0003713, GO:0004402, GO:0005671, GO:0010484, GO:0070577, GO:0034401, GO:0044154, GO:0043971, GO:0043972, GO:0043970
Pa_1_22860	GO:0005737, GO:0005829, GO:0005634, GO:0003677, GO:0042493, GO:0005515, GO:0005524, GO:0016301, GO:0016887, GO:0022626, GO:0007059, GO:0000056, GO:0009295, GO:0030261, GO:0006448, GO:0042624
Pa_1_22880	GO:0008270, GO:0016021, GO:0005515, GO:0006886, GO:0015031, GO:0006888, GO:0030126, GO:0006890, GO:0008060, GO:0032312, GO:0005793, GO:0048205
Pa_1_22890	GO:0016021, GO:0055085, GO:0015031, GO:0005743
Pa_1_2290	GO:0005634, GO:0006281, GO:0006298, GO:0016799, GO:0030983, GO:0004844
Pa_1_22910	GO:0008152
Pa_1_22920	GO:0003677, GO:0003700, GO:0003993
Pa_1_22930	GO:0005737, GO:0005829, GO:0005634, GO:0003677, GO:0005622, GO:0008270, GO:0003700, GO:0042493, GO:0005515, GO:0003676, GO:0005975, GO:0006355, GO:0006351, GO:0045892, GO:0006357, GO:0015976, GO:0045944, GO:0003690, GO:0000978, GO:0005641, GO:0001078, GO:0000433
Pa_1_22940	GO:0003677, GO:0005524, GO:0006281, GO:0008094, GO:0006259, GO:0006310, GO:0003697
Pa_1_22950	GO:0005737, GO:0016021, GO:0005488, GO:0005886, GO:0005739, GO:0006915, GO:0031966, GO:0030659, GO:0016906
Pa_1_22960	GO:0004601
Pa_1_22970	GO:0005737, GO:0005829, GO:0005634, GO:0005488, GO:0006886, GO:0004872, GO:0008565, GO:0005635, GO:0006606, GO:0006404, GO:0008139, GO:0006609, GO:0051031
Pa_1_22980	GO:0005829, GO:0003676, GO:0003723, GO:0030529, GO:0046540, GO:0005685, GO:0000395
Pa_1_22990	GO:0005524, GO:0009396, GO:0030272
Pa_1_230	GO:0005634, GO:0003700, GO:0043565, GO:0000790, GO:0003690, GO:0008134, GO:0005667, GO:0003705, GO:0051090
Pa_1_2300	GO:0016740, GO:0008168, GO:0006629, GO:0035556, GO:0004629
Pa_1_23000	GO:0005829, GO:0005634, GO:0016021, GO:0022857, GO:0042493, GO:0055085, GO:0005783, GO:0033554, GO:0015031, GO:0000747, GO:0031142, GO:0005887, GO:0015197, GO:0006857, GO:0015833, GO:0034634, GO:0071276, GO:0005427, GO:0006790, GO:0015198
Pa_1_23010	GO:0006396, GO:0019901, GO:0000079, GO:0016301, GO:0006355
Pa_1_23020	GO:0005634, GO:0003677, GO:0008270, GO:0003700, GO:0045493, GO:0006351, GO:0045893
Pa_1_23030	GO:0005737, GO:0005829, GO:0005634, GO:0005622, GO:0000287, GO:0006633, GO:0000105, GO:0000290, GO:0008897, GO:0009059, GO:0004401
Pa_1_23035	GO:0000287, GO:0008897, GO:0009059
Pa_1_23040	GO:0016787, GO:0000287, GO:0008897, GO:0009059
Pa_1_23060	GO:0050660, GO:0006508, GO:0004190, GO:0008812, GO:0006066, GO:0046562, GO:0016614, GO:0047682, GO:0000166, GO:0033718
Pa_1_23070	GO:0005525, GO:0005622, GO:0008270, GO:0016021, GO:0005886, GO:0016020, GO:0004872, GO:0000324, GO:0005794, GO:0000166, GO:0006614, GO:0003924, GO:0005785, GO:0005047, GO:0006893
Pa_1_2310	GO:0005622, GO:0008270, GO:0016021, GO:0015171, GO:0000062, GO:0015220, GO:0034228, GO:0015653
Pa_1_23100	GO:0016021, GO:0009986
Pa_1_23110	GO:0005737, GO:0005829, GO:0005622, GO:0005515, GO:0005524, GO:0005816, GO:0016020, GO:0016301, GO:0030437, GO:0005874, GO:0006355, GO:0003777, GO:0017111, GO:0016887, GO:0007131, GO:0030448, GO:0005635, GO:0000156, GO:0000022, GO:0031134, GO:0000741, GO:0000920, GO:0007018, GO:0008134, GO:0000132, GO:0040023, GO:0000235, GO:0008569, GO:0005938, GO:0030473, GO:0030286, GO:0005881, GO:0005868, GO:…
Pa_1_23120	GO:0016740, GO:0016757, GO:0004872
Pa_1_23130	GO:0000226, GO:0006364, GO:0005815, GO:0000922, GO:0030688
Pa_1_23150	GO:0005634, GO:0003677, GO:0008270, GO:0016021, GO:0003700, GO:0006351, GO:0031965
Pa_1_23160	GO:0005737, GO:0016787, GO:0005634, GO:0000287, GO:0006351, GO:0005935, GO:0045944, GO:0008897, GO:0009059, GO:0046969, GO:0046970, GO:0032041, GO:0047611, GO:0034739, GO:0000083
Pa_1_23190	GO:0016740, GO:0005737, GO:0046872, GO:0005829, GO:0005634, GO:0008479, GO:0008616, GO:0004799, GO:0006231
Pa_1_2320	GO:0005737, GO:0005634, GO:0005515, GO:0005739, GO:0001302, GO:0019358, GO:0006348, GO:0000183, GO:0004514, GO:0009435, GO:0004516, GO:0019357, GO:0019363
Pa_1_23200	GO:0050662, GO:0003824, GO:0044237
Pa_1_23210	GO:0005840, GO:0003735, GO:0006412, GO:0022627, GO:0002181, GO:0006414, GO:0000028
Pa_1_23230	GO:0005829, GO:0003677, GO:0005622, GO:0005886, GO:0032153, GO:0051286, GO:0016020, GO:0000131, GO:0005509, GO:0010008, GO:0005089, GO:0035023, GO:0035556, GO:0003779, GO:0046873, GO:0030448, GO:0007015, GO:0042144, GO:0005935, GO:0030479, GO:0006897, GO:0043332, GO:0007121, GO:0051666, GO:0030036, GO:0015629, GO:0005083, GO:0008154, GO:0006461, GO:0005199, GO:0004803, GO:0015074, GO:0006313, GO:…
Pa_1_23240	GO:0016740, GO:0016787, GO:0050660, GO:0016021, GO:0005506, GO:0009055, GO:0031505, GO:0005739, GO:0016746, GO:0005783, GO:0005794, GO:0033554, GO:0004601, GO:0006950, GO:0004623, GO:0032048, GO:0003841, GO:0042171, GO:0006654
Pa_1_23260	GO:0005829, GO:0006470, GO:0004725, GO:0008138, GO:0017017, GO:0000188
Pa_1_23270	GO:0016740, GO:0005737, GO:0005829, GO:0016021, GO:0005739, GO:0017000, GO:0019344, GO:0009086, GO:0004414, GO:0016413, GO:0033813, GO:0009092
Pa_1_23280	GO:0003677, GO:0005622, GO:0008270, GO:0005488, GO:0005524, GO:0003676, GO:0004674, GO:0006355, GO:0006310, GO:0006368, GO:0006406, GO:0031124, GO:0006283, GO:0000347, GO:0000446, GO:0000445
Pa_1_23290	GO:0005634, GO:0003677, GO:0008270, GO:0003700
Pa_1_2330	GO:0005515, GO:0003824, GO:0003676, GO:0030515, GO:0000462, GO:0006351, GO:0030490, GO:0030529, GO:0005819, GO:0032040, GO:0045943, GO:0034455
Pa_1_23300	GO:0016740, GO:0016787, GO:0042493, GO:0005488, GO:0016491, GO:0005515, GO:0016829, GO:0005739, GO:0000287, GO:0004319, GO:0009058, GO:0016874, GO:0006633, GO:0055114, GO:0004318, GO:0005811, GO:0008897, GO:0009059, GO:0018580, GO:0005835, GO:0004321, GO:0004313, GO:0004317, GO:0004314, GO:0016295, GO:0004320, GO:0016296, GO:0016409, GO:0004312
Pa_1_23310	GO:0016740, GO:0005737, GO:0005488, GO:0016491, GO:0006508, GO:0005515, GO:0003824, GO:0005739, GO:0000287, GO:0004190, GO:0009058, GO:0006633, GO:0004318, GO:0007088, GO:0004316, GO:0008897, GO:0009059, GO:0018580, GO:0005835, GO:0004321, GO:0004312, GO:0004315
Pa_1_23320	GO:0005737, GO:0016787, GO:0005829, GO:0005634, GO:0003677, GO:0008270, GO:0003700, GO:0042493, GO:0016491, GO:0030170, GO:0008892, GO:0016810, GO:0004375, GO:0006544, GO:0046098
Pa_1_23350	GO:0005737, GO:0009986, GO:0005576, GO:0005618, GO:0005794, GO:0033554, GO:0006520, GO:0004067, GO:0006528, GO:0042597, GO:0006530
Pa_1_23357	GO:0005506, GO:0031418, GO:0016706
Pa_1_23380	GO:0005829, GO:0005634, GO:0005840, GO:0003735, GO:0006412, GO:0005524, GO:0003676, GO:0005975, GO:0003723, GO:0004674, GO:0005730, GO:0008026, GO:0005635, GO:0004386, GO:0004004, GO:0042274, GO:0006364, GO:0030686, GO:0030687
Pa_1_2340	GO:0005737, GO:0046872, GO:0005829, GO:0005634, GO:0008270, GO:0005488, GO:0005524, GO:0005739, GO:0006289, GO:0005635, GO:0003684, GO:0004831, GO:0006437, GO:0000224, GO:0006515, GO:0006517
Pa_1_23400	GO:0005829, GO:0005634, GO:0003700, GO:0050662, GO:0016491, GO:0005625, GO:0030246, GO:0033554, GO:0034599, GO:0009272, GO:0043565, GO:0001403, GO:0042125, GO:0019388, GO:0003978, GO:0006012, GO:0004034, GO:0033499
Pa_1_23410	GO:0005737, GO:0005829, GO:0005634, GO:0050660, GO:0008270, GO:0016491, GO:0005975, GO:0000287, GO:0034599, GO:0032440, GO:0016868, GO:0003960, GO:0017091, GO:0035925, GO:0016071
Pa_1_23420	GO:0005737, GO:0008270, GO:0016811, GO:0070403, GO:0006342, GO:0006476
Pa_1_23430	GO:0003677, GO:0016021, GO:0005886, GO:0055085, GO:0005739, GO:0005789, GO:0005215, GO:0006310, GO:0015293, GO:0015074
Pa_1_23440	GO:0016884, GO:0005829, GO:0005634, GO:0003677, GO:0008270, GO:0016021, GO:0016491, GO:0005886, GO:0016020, GO:0005794, GO:0006351, GO:0010181, GO:0000256, GO:0045121, GO:0006144, GO:0015205, GO:0015505, GO:0015213, GO:0005274
Pa_1_23460	GO:0005634, GO:0006355
Pa_1_23470	GO:0016787, GO:0005829, GO:0003677, GO:0016021, GO:0001950, GO:0005886, GO:0055085, GO:0006281, GO:0016301, GO:0005794, GO:0033554, GO:0005789, GO:0005215, GO:0016620, GO:0009166, GO:0008271
Pa_1_23490	GO:0005829, GO:0005634, GO:0003677, GO:0005515, GO:0005524, GO:0006260, GO:0006281, GO:0005739, GO:0003723, GO:0004674, GO:0006952, GO:0017111, GO:0006310, GO:0043596, GO:0000724, GO:0051455, GO:0007064, GO:0007049, GO:0009378, GO:0005663, GO:0003689, GO:0031390, GO:0007062, GO:0006270, GO:0035753
Pa_1_2350	GO:0005524, GO:0004674
Pa_1_23510	GO:0016787, GO:0004416
Pa_1_23520	GO:0004497, GO:0009055, GO:0020037, GO:0016705
Pa_1_23530	GO:0005488, GO:0004872, GO:0007229, GO:0007160, GO:0008305
Pa_1_23540	GO:0005737, GO:0016021, GO:0042493, GO:0005488, GO:0016491, GO:0006508, GO:0009986, GO:0005576, GO:0005886, GO:0042710, GO:0005524, GO:0003824, GO:0003676, GO:0030447, GO:0030248, GO:0004553, GO:0005975, GO:0005618, GO:0007047, GO:0031225, GO:0016020, GO:0009277, GO:0031505, GO:0008061, GO:0043169, GO:0005529, GO:0016998, GO:0005783, GO:0005789, GO:0004252, GO:0016810, GO:0006950, GO:0004386, GO:…
Pa_1_23550	GO:0005737, GO:0016021, GO:0005488, GO:0006629, GO:0016627
Pa_1_23560	GO:0005488, GO:0005524, GO:0017111
Pa_1_23570	GO:0005634, GO:0003677, GO:0008270, GO:0003700, GO:0005506, GO:0016705, GO:0031418, GO:0006351
Pa_1_23580	GO:0016787, GO:0005829, GO:0005634, GO:0005622, GO:0016021, GO:0000932, GO:0008168, GO:0016192, GO:0005739, GO:0003723, GO:0004221, GO:0006511, GO:0000184, GO:0000105, GO:0000290, GO:0004401, GO:0050072, GO:0031086
Pa_1_23620	GO:0008270, GO:0016491, GO:0035556
Pa_1_23640	GO:0016787, GO:0005634, GO:0003677, GO:0005622, GO:0008270, GO:0016021, GO:0003700, GO:0006508, GO:0005886, GO:0005524, GO:0003824, GO:0003676, GO:0055085, GO:0005975, GO:0016805, GO:0005509, GO:0033554, GO:0005215, GO:0000329, GO:0016773, GO:0005507, GO:0070314, GO:0004527, GO:0015109, GO:0031166, GO:0015182, GO:0015188, GO:0015189, GO:0032975, GO:0015174
Pa_1_23650	GO:0016021, GO:0006096, GO:0005524, GO:0055085, GO:0005975, GO:0016301, GO:0005215, GO:0016773, GO:0004396
Pa_1_23660	GO:0005737, GO:0005634, GO:0003677, GO:0005515, GO:0006355, GO:0006397, GO:0051301, GO:0007049, GO:0005681, GO:0045292, GO:0008380, GO:0000398, GO:0000974, GO:0071006, GO:0010389
Pa_1_23670	GO:0005634, GO:0008270, GO:0005515, GO:0008168, GO:0000723, GO:0048189, GO:0000790, GO:0006338, GO:0006348, GO:0000781, GO:0048188, GO:0051568
Pa_1_23680	GO:0005829, GO:0005634, GO:0005488, GO:0000226, GO:0003676, GO:0032153, GO:0000166, GO:0030529, GO:0007163, GO:0000235, GO:0048487, GO:0007023
Pa_1_2370	GO:0050660, GO:0009055, GO:0033554, GO:0006810, GO:0005789, GO:0022900, GO:0007049, GO:0016671, GO:0016538, GO:0034975, GO:0006467, GO:0016972
Pa_1_23700	GO:0016787, GO:0003824, GO:0016798
Pa_1_23720	GO:0005737, GO:0046872, GO:0005829, GO:0005634, GO:0005524, GO:0055085, GO:0016301, GO:0016874, GO:0005856, GO:0003993, GO:0030866, GO:0030950, GO:0032958, GO:0004143, GO:0007205, GO:0033857, GO:0000829, GO:0052723, GO:0052724, GO:0000832, GO:0050848
Pa_1_23730	GO:0005829, GO:0005634, GO:0005515, GO:0003824, GO:0032153, GO:0005816, GO:0042274, GO:0006364, GO:0032040, GO:0005732, GO:0034388
Pa_1_23740	GO:0016021, GO:0005886, GO:0005783, GO:0005794, GO:0015171, GO:0005789, GO:0006970, GO:0000329, GO:0005283, GO:0005887, GO:0006631, GO:0015226, GO:0015203, GO:0015193, GO:0019676, GO:0006562
Pa_1_23750	GO:0005737, GO:0008180
Pa_1_23760	GO:0005829, GO:0008270, GO:0016491, GO:0004022, GO:0033554, GO:0000166, GO:0046526, GO:0042732, GO:0015986, GO:0000276, GO:0015078, GO:0003939, GO:0019318, GO:0019407, GO:0050019
Pa_1_23770	GO:0005829, GO:0005515, GO:0030131, GO:0006886, GO:0016192, GO:0005768, GO:0015031, GO:0030437, GO:0035091, GO:0007154, GO:0042147, GO:0031965, GO:0005628, GO:0032266, GO:0030905
Pa_1_23780	GO:0005737, GO:0005525, GO:0005622, GO:0006412, GO:0016021, GO:0006508, GO:0005739, GO:0004190, GO:0003924, GO:0003746, GO:0032543, GO:0005452
Pa_1_23790	GO:0016616, GO:0005506, GO:0005488, GO:0016491, GO:0006508, GO:0016829, GO:0004177, GO:0009987, GO:0008235, GO:0009405, GO:0016702, GO:0045329, GO:0031418, GO:0050353, GO:0005777, GO:0016853, GO:0003857, GO:0004300, GO:0006635, GO:0006631, GO:0004316, GO:0006097, GO:0033989, GO:0032934
Pa_1_2380	GO:0005737, GO:0005829, GO:0005634, GO:0050660, GO:0000079, GO:0016301, GO:0043130, GO:0005789, GO:0007165, GO:0006351, GO:0007346, GO:0006338, GO:0051301, GO:0007049, GO:0000307, GO:0042393, GO:0045893, GO:0016671, GO:0016538, GO:0030295, GO:0006467
Pa_1_23800	GO:0016740, GO:0005737, GO:0005525, GO:0005829, GO:0005634, GO:0005524, GO:0016301, GO:0007126, GO:0006614, GO:0016773, GO:0001906
Pa_1_23820	GO:0005737, GO:0046872, GO:0005829, GO:0005634, GO:0005506, GO:0016491, GO:0005524, GO:0017111, GO:0016887, GO:0051536, GO:0016226, GO:0005743, GO:0051539, GO:0002098, GO:0004825
Pa_1_23830	GO:0005622, GO:0005840, GO:0003735, GO:0006412, GO:0003779
Pa_1_23840	GO:0016740, GO:0005737, GO:0005634, GO:0006777
Pa_1_23850	GO:0005525, GO:0005829, GO:0005634, GO:0005622, GO:0008270, GO:0001950, GO:0005886, GO:0005515, GO:0003676, GO:0016020, GO:0009405, GO:0030437, GO:0006995, GO:0003924, GO:0030448, GO:0001302, GO:0034599, GO:0031137, GO:0009272, GO:0008360, GO:0007264, GO:0007265, GO:0032005, GO:0007163, GO:0005935, GO:0007124, GO:0007121, GO:0007051, GO:0033205, GO:0034605, GO:0000751, GO:0045595, GO:0043161, GO:…
Pa_1_23870	GO:0016021, GO:0005886, GO:0005216, GO:0005244, GO:0030007, GO:0005267
Pa_1_23890	GO:0005737, GO:0005829, GO:0005634, GO:0005524, GO:0004674, GO:0016874, GO:0004252, GO:0006351, GO:0030702, GO:0006511, GO:0000070, GO:0030466, GO:0007346, GO:0051301, GO:0006348, GO:0007049, GO:0010570, GO:0034613, GO:0003688, GO:0000086, GO:0000082, GO:0042787, GO:0031461, GO:0031625, GO:0030674, GO:0051570, GO:0031048, GO:0006283, GO:0019005, GO:0032876, GO:0031146, GO:0006521, GO:0043494, GO:…
Pa_1_2390	GO:0003677, GO:0005488
Pa_1_23900	GO:0006511, GO:0031461, GO:0031625
Pa_1_23920	GO:0005737, GO:0003677, GO:0003700, GO:0005488, GO:0006892
Pa_1_23930	GO:0005737, GO:0046872, GO:0005829, GO:0005634, GO:0042493, GO:0005515, GO:0005524, GO:0005816, GO:0031505, GO:0016301, GO:0009405, GO:0004674, GO:0000747, GO:0006355, GO:0006351, GO:0030448, GO:0034599, GO:0009272, GO:0046685, GO:0034644, GO:0000917, GO:0032005, GO:0030242, GO:0051519, GO:0004707, GO:0000165, GO:0045931, GO:0005934, GO:0070314, GO:0051403, GO:0034605, GO:0006883, GO:0001101, GO:…
Pa_1_23940	GO:0016740, GO:0005737, GO:0009986, GO:0030446, GO:0005515, GO:0030170, GO:0005975, GO:0004645, GO:0008184, GO:0005980
Pa_1_23950	GO:0005525, GO:0046872, GO:0016787, GO:0005829, GO:0005634, GO:0001950, GO:0005886, GO:0032153, GO:0005816, GO:0005739, GO:0009405, GO:0030437, GO:0048315, GO:0030435, GO:0003924, GO:0030448, GO:0001302, GO:0007124, GO:0019236, GO:0004871, GO:0031683, GO:0008361, GO:0008832, GO:0045014, GO:0005938, GO:0009749, GO:0019933, GO:0001402, GO:0007189, GO:0007186, GO:0005834, GO:0001664, GO:0010255, GO:…
Pa_1_23960	GO:0016787, GO:0005622, GO:0008270
Pa_1_23970	GO:0005737, GO:0005515, GO:0005739, GO:0007015, GO:0005935, GO:0030479, GO:0006897, GO:0051666, GO:0051015, GO:0051017
Pa_1_23990	GO:0008270
Pa_1_240	GO:0005634, GO:0003677, GO:0008270, GO:0003700, GO:0006281, GO:0006310, GO:0006302
Pa_1_2400	GO:0005622, GO:0003676
Pa_1_24000	GO:0005634, GO:0008270, GO:0003700, GO:0042493, GO:0030447, GO:0043565, GO:0042128, GO:0034605, GO:0071280, GO:0000122, GO:0071285, GO:0090295
Pa_1_24010	GO:0005515, GO:0003723, GO:0005730, GO:0007346, GO:0006364, GO:0032040, GO:0000447, GO:0030686
Pa_1_24020	GO:0005829, GO:0008270, GO:0016491, GO:0004022, GO:0033554, GO:0006066
Pa_1_24030	GO:0005634, GO:0003677, GO:0005622, GO:0005524, GO:0003676, GO:0004527, GO:0006270
Pa_1_24040	GO:0005634, GO:0005622, GO:0003676, GO:0005730, GO:0006364, GO:0000027, GO:0004527, GO:0008408
Pa_1_24050	GO:0016740, GO:0046872, GO:0005829, GO:0005634, GO:0003677, GO:0016747, GO:0008270, GO:0005515, GO:0006281, GO:0006342, GO:0035556, GO:0006355, GO:0006351, GO:0000070, GO:0030466, GO:0000790, GO:0006348, GO:0006354, GO:0032968, GO:0000183, GO:0006302, GO:0031939, GO:0051726, GO:0048478, GO:0004402, GO:0034401, GO:0035267, GO:0032777, GO:0010485, GO:0034508, GO:0000123, GO:0051445, GO:0033100
Pa_1_24060	GO:0005737, GO:0005829, GO:0005634, GO:0003677, GO:0005515, GO:0005524, GO:0006260, GO:0017111, GO:0016887, GO:0006268, GO:0004386, GO:0030466, GO:0003682, GO:0007346, GO:0000790, GO:0051301, GO:0006271, GO:0006348, GO:0006357, GO:0003697, GO:0009378, GO:0031390, GO:0006270, GO:0003688, GO:0007090, GO:0000084, GO:0003712, GO:0031261, GO:0005656, GO:0006267, GO:0000727, GO:0042555, GO:0031298, GO:…
Pa_1_24070	GO:0006777, GO:0005975, GO:0016810, GO:0004099
Pa_1_24080	GO:0005829, GO:0005634, GO:0008270, GO:0003700, GO:0005488, GO:0006886, GO:0032153, GO:0032258, GO:0016236, GO:0007126, GO:0030435, GO:0006888, GO:0030242, GO:0034727, GO:0000407, GO:0034497, GO:0030008, GO:0016050
Pa_1_24090	GO:0005737, GO:0016787, GO:0006886, GO:0006900, GO:0015031, GO:0043162
Pa_1_2410	GO:0050660, GO:0016021, GO:0005506, GO:0016491, GO:0009055, GO:0016020, GO:0005509, GO:0006810, GO:0016174
Pa_1_24110	GO:0005634, GO:0003677, GO:0008270, GO:0003824, GO:0003676, GO:0006281, GO:0016874, GO:0003684, GO:0006301, GO:0000790, GO:0004842, GO:0000077, GO:0031144
Pa_1_24120	GO:0005737, GO:0005634, GO:0005515, GO:0000070, GO:0005819, GO:0033205, GO:0032133, GO:0000939
Pa_1_24130	GO:0006457, GO:0031072, GO:0051082, GO:0006950
Pa_1_24140	GO:0005737, GO:0005634, GO:0003824, GO:0030170, GO:0008483, GO:0016020, GO:0009058, GO:0016769, GO:0047536, GO:0009042, GO:0005044
Pa_1_24160	GO:0016787, GO:0005886, GO:0046933, GO:0015986, GO:0006200, GO:0022904, GO:0005753, GO:0045261, GO:0008144, GO:0042776, GO:0000276, GO:0006119, GO:0016887
Pa_1_24170	GO:0005886, GO:0006810, GO:0005743, GO:0022900, GO:0005747, GO:0008137, GO:0006120, GO:0072593, GO:0070469, GO:0019933, GO:0003954, GO:0007420, GO:0032981, GO:0048146, GO:0001932, GO:0051591, GO:0016651
Pa_1_24180	GO:0005829, GO:0005634, GO:0005488, GO:0043161, GO:0034657, GO:0045721
Pa_1_24190	GO:0016740, GO:0005737, GO:0005525, GO:0005829, GO:0005634, GO:0009116, GO:0005622, GO:0042493, GO:0005515, GO:0005524, GO:0016757, GO:0032153, GO:0005816, GO:0016301, GO:0017111, GO:0008655, GO:0016773, GO:0004849, GO:0004845, GO:0006223, GO:0017144
Pa_1_2420	GO:0005829, GO:0005634, GO:0005524, GO:0016192, GO:0051286, GO:0000131, GO:0031505, GO:0005739, GO:0004674, GO:0015031, GO:0051258, GO:0007165, GO:0003779, GO:0030448, GO:0006970, GO:0008298, GO:0051028, GO:0007264, GO:0051056, GO:0005826, GO:0005516, GO:0071520, GO:0000142, GO:0000915, GO:0007049, GO:0007163, GO:0005935, GO:0005543, GO:0030479, GO:0006897, GO:0005934, GO:0043332, GO:0007121, GO:…
Pa_1_24200	GO:0050660, GO:0016491, GO:0006116, GO:0005759, GO:0005886, GO:0005739, GO:0005509, GO:0005743, GO:0005758, GO:0001300, GO:0008137, GO:0006120, GO:0043065, GO:0003954, GO:0019655, GO:0070469, GO:0045271
Pa_1_24210	GO:0016021, GO:0005789, GO:0072546, GO:0034975
Pa_1_24220	GO:0005829, GO:0005634, GO:0042493, GO:0005488, GO:0005886, GO:0030131, GO:0006886, GO:0016192, GO:0030121, GO:0005905, GO:0005768, GO:0005816, GO:0030276, GO:0016197, GO:0006896, GO:0030447, GO:0030122, GO:0008565, GO:0070317, GO:0030117
Pa_1_24240	GO:0005829, GO:0005634, GO:0006508, GO:0003824, GO:0008233, GO:0006629, GO:0006915, GO:0004252, GO:0006511, GO:0034605, GO:0051603, GO:0031461, GO:0031625, GO:0030163, GO:0044255
Pa_1_24250	GO:0003743, GO:0005622, GO:0003676, GO:0016301, GO:0005730, GO:0000463, GO:0005654, GO:0019843, GO:0004527, GO:0000055
Pa_1_24260	GO:0005525, GO:0016787, GO:0005829, GO:0005634, GO:0005886, GO:0005515, GO:0006886, GO:0009405, GO:0006623, GO:0010008, GO:0005794, GO:0015031, GO:0003924, GO:0000139, GO:0007264, GO:0005741, GO:0042147, GO:0006897, GO:0071470, GO:0070314, GO:0000011, GO:0005770, GO:0033157, GO:0031338, GO:0007038
Pa_1_24270	GO:0005840, GO:0003735, GO:0006412, GO:0042493, GO:0042254, GO:0005730, GO:0030687, GO:0042273
Pa_1_24280	GO:0016874
Pa_1_24290	GO:0005525, GO:0015031, GO:0007264
Pa_1_2430	GO:0016740, GO:0003677, GO:0016021, GO:0003700, GO:0016757, GO:0016020, GO:0009405, GO:0006810, GO:0006352, GO:0003899, GO:0016987, GO:0035252, GO:0045227, GO:0006688
Pa_1_24300	GO:0005737, GO:0005829, GO:0005634, GO:0005506, GO:0016491, GO:0003824, GO:0020037, GO:0031505, GO:0050661, GO:0010181, GO:0051536, GO:0051539, GO:0003899, GO:0000103, GO:0019344, GO:0009086, GO:0008652, GO:0009337, GO:0004783, GO:0070814, GO:0048307, GO:0050311
Pa_1_24310	GO:0016740, GO:0005622, GO:0016021, GO:0016491, GO:0005886, GO:0005524, GO:0007047, GO:0016020, GO:0009405, GO:0005783, GO:0004674, GO:0005096, GO:0030448, GO:0007264, GO:0051056, GO:0030428, GO:0005935, GO:0000916, GO:0006038, GO:0006031, GO:0004100, GO:0030476, GO:0030659, GO:0005887, GO:0005085, GO:0034217
Pa_1_24340	GO:0016491, GO:0005524, GO:0005739, GO:0016887, GO:0015407
Pa_1_24350	GO:0016021, GO:0000502
Pa_1_24370	GO:0016884, GO:0016021, GO:0005488, GO:0003824, GO:0055085, GO:0015031, GO:0051537, GO:0015833
Pa_1_24390	GO:0016884
Pa_1_2440	GO:0016740, GO:0008270, GO:0016021, GO:0016746, GO:0005789, GO:0019706, GO:0018345
Pa_1_24400	GO:0005737, GO:0005515, GO:0005524, GO:0005874, GO:0003777, GO:0016887, GO:0005654, GO:0007018, GO:0051233, GO:0000092, GO:0051012, GO:0051231
Pa_1_24410	GO:0005634, GO:0005622, GO:0008270, GO:0042493, GO:0005886, GO:0008168, GO:0005783, GO:0006694, GO:0016126, GO:0005741, GO:0006696, GO:0005811, GO:0090002, GO:0003838, GO:0071210
Pa_1_24420	GO:0005737, GO:0016787, GO:0005634, GO:0003677, GO:0008270, GO:0016021, GO:0003700, GO:0016491, GO:0004497, GO:0055085, GO:0006031, GO:0004100, GO:0018662, GO:0019439
Pa_1_24440	GO:0016021, GO:0005524, GO:0016020, GO:0016301, GO:0000155, GO:0018106, GO:0004872, GO:0006355, GO:0000156, GO:0000161, GO:0005887, GO:0018298, GO:0008020
Pa_1_24450	GO:0016021, GO:0005506, GO:0042493, GO:0016491, GO:0005886, GO:0004497, GO:0009055, GO:0020037, GO:0016705, GO:0016020, GO:0070330, GO:0006810, GO:0005789, GO:0010181, GO:0003958, GO:0005792, GO:0022900, GO:0016126, GO:0005741, GO:0006696
Pa_1_24480	GO:0050660, GO:0008812, GO:0006066, GO:0046562, GO:0016614, GO:0047639
Pa_1_2450	GO:0005829, GO:0005634, GO:0042493, GO:0000226, GO:0005816, GO:0030447, GO:0019901, GO:0000079, GO:0016301, GO:0007165, GO:0030448, GO:0031137, GO:0051301, GO:0007067, GO:0007049, GO:0034613, GO:0007114, GO:0010389, GO:0016538, GO:0070317, GO:0047485, GO:0000746, GO:2000045, GO:0007089, GO:0000082, GO:0007096, GO:0051726, GO:0030011
Pa_1_24510	GO:0016787, GO:0050660, GO:0004091, GO:0006508, GO:0005576, GO:0030248, GO:0004553, GO:0005975, GO:0045493, GO:0016614, GO:0008236, GO:0000272, GO:0030600
Pa_1_24520	GO:0016491, GO:0005524, GO:0004672, GO:0010181
Pa_1_24530	GO:0005634, GO:0008270, GO:0003700
Pa_1_24540	GO:0016787
Pa_1_24550	GO:0016772, GO:0004713
Pa_1_24560	GO:0005524, GO:0008233, GO:0017111, GO:0000502
Pa_1_24570	GO:0016021, GO:0004872, GO:0004674, GO:0005216
Pa_1_24580	GO:0016787, GO:0016747, GO:0003824, GO:0005975, GO:0043169
Pa_1_24590	GO:0005488, GO:0016491
Pa_1_2460	GO:0005488
Pa_1_24600	GO:0005634, GO:0003677, GO:0008270, GO:0003700, GO:0016491, GO:0016301, GO:0010181, GO:0004733
Pa_1_24610	GO:0005622, GO:0008270
Pa_1_24620	GO:0005488
Pa_1_24630	GO:0050660, GO:0008762, GO:0016021, GO:0055085, GO:0016614
Pa_1_24640	GO:0006071, GO:0006629, GO:0008081, GO:0008889
Pa_1_24650	GO:0005524, GO:0008233, GO:0017111, GO:0000502
Pa_1_24660	GO:0006508, GO:0005576, GO:0005886, GO:0031225, GO:0009277, GO:0046658, GO:0008237, GO:0009405, GO:0004190, GO:0030287, GO:0043171, GO:0005199, GO:0044267, GO:0000754
Pa_1_2480	GO:0016787, GO:0008270, GO:0016491, GO:0005524, GO:0003676, GO:0008026, GO:0015986, GO:0006200, GO:0022904, GO:0005753, GO:0042776, GO:0000276, GO:0015078, GO:0006119
Pa_1_2490	GO:0005829, GO:0008270, GO:0016491, GO:0005625, GO:0030446, GO:0033554, GO:0000166, GO:0046526, GO:0042732, GO:0015986, GO:0000276, GO:0015078, GO:0003939, GO:0019318, GO:0005999, GO:0019407, GO:0050019
Pa_1_250	GO:0005576, GO:0030248, GO:0004553, GO:0005975, GO:0045493, GO:0031176
Pa_1_2500	GO:0016021, GO:0005886, GO:0006886, GO:0016192, GO:0004872, GO:0005783, GO:0033554, GO:0005789, GO:0006888
Pa_1_2510	GO:0003677, GO:0006281
Pa_1_2520	GO:0003677, GO:0003824, GO:0006281
Pa_1_2540	GO:0005506, GO:0016702, GO:0016706, GO:0016847, GO:0045486, GO:0016707
Pa_1_2550	GO:0030515, GO:0006351, GO:0030490, GO:0032040, GO:0034455
Pa_1_2560	GO:0005634, GO:0003677, GO:0008270, GO:0006355, GO:0006366, GO:0003899, GO:0006383, GO:0005666, GO:0005665, GO:0005736, GO:0006360
Pa_1_2570	GO:0003677, GO:0003824
Pa_1_2600	GO:0016021, GO:0006810, GO:0005765, GO:0031419
Pa_1_2610	GO:0005829, GO:0005634, GO:0042493, GO:0003824, GO:0003676, GO:0005739, GO:0003723, GO:0016301, GO:0004674, GO:0006397, GO:0006379, GO:0005847, GO:0006369, GO:0006378
Pa_1_2620	GO:0005622, GO:0003676, GO:0003899
Pa_1_2630	GO:0005737, GO:0005525, GO:0046872, GO:0005829, GO:0005634, GO:0016779, GO:0006400, GO:0008193
Pa_1_2640	GO:0005829, GO:0005634, GO:0003700, GO:0005515, GO:0008168, GO:0000723, GO:0043565, GO:0000790, GO:0006338, GO:0006348, GO:0000781, GO:0046983, GO:0048188, GO:0051568
Pa_1_2650	GO:0046872, GO:0005829, GO:0003677, GO:0005515, GO:0030447, GO:0005739, GO:0006366, GO:0003899, GO:0005665
Pa_1_2670	GO:0005737, GO:0005829, GO:0005634, GO:0006412, GO:0005625, GO:0001950, GO:0009986, GO:0005576, GO:0030446, GO:0005886, GO:0030445, GO:0005515, GO:0044416, GO:0005524, GO:0009277, GO:0005739, GO:0009636, GO:0006457, GO:0033554, GO:0002181, GO:0016887, GO:0051082, GO:0006950, GO:0005844, GO:0006415, GO:0007346, GO:0000329, GO:0006364, GO:0042026, GO:0006626, GO:0005624, GO:0005516, GO:0034605, GO:…
Pa_1_2680	GO:0005737, GO:0005829, GO:0005634, GO:0003743, GO:0005840, GO:0005515, GO:0033554, GO:0000184, GO:0016281, GO:0006417, GO:0010494, GO:0032266, GO:0051726, GO:0000339, GO:0005845
Pa_1_2690	GO:0005829, GO:0005622, GO:0003824, GO:0016874, GO:0042802, GO:0003729, GO:0005782, GO:0006631, GO:0005097, GO:0004467, GO:0005778
Pa_1_270	GO:0003677, GO:0008270, GO:0015074
Pa_1_2720	GO:0005737, GO:0046872, GO:0005524, GO:0006886, GO:0016192, GO:0030447, GO:0016020, GO:0005739, GO:0006457, GO:0010008, GO:0006995, GO:0005773, GO:0007035, GO:0051082, GO:0000329, GO:0004713, GO:0005484, GO:0007033, GO:0044267, GO:0032266, GO:0000011, GO:0000750, GO:0070772, GO:0016307, GO:0000285, GO:0042981
Pa_1_2730	GO:0005737, GO:0042493, GO:0050662, GO:0005488, GO:0006886, GO:0004872, GO:0005643, GO:0017056, GO:0008565, GO:0007094, GO:0006406, GO:0003857, GO:0006631, GO:0042991
Pa_1_2740	GO:0005634, GO:0008270, GO:0003700, GO:0050662, GO:0004497, GO:0009055, GO:0020037, GO:0016705, GO:0006886, GO:0004872, GO:0070403, GO:0008565, GO:0003857, GO:0006631, GO:0008691
Pa_1_2750	GO:0005634, GO:0008270, GO:0016021, GO:0006260, GO:0016874, GO:0007031, GO:0005778
Pa_1_2760	GO:0016021
Pa_1_2770	GO:0008270
Pa_1_2780	GO:0004864, GO:0005515, GO:0005816, GO:0005730, GO:0031134, GO:0051301, GO:0008608, GO:0031097, GO:0071937, GO:0000777, GO:0010389, GO:0030869, GO:0004725, GO:0008138, GO:0007096, GO:0000278, GO:0035853, GO:0031566, GO:0031565, GO:0045736, GO:0031031
Pa_1_2810	GO:0005525, GO:0016787, GO:0005829, GO:0009116, GO:0005524, GO:0003824, GO:0003676, GO:0006886, GO:0016757, GO:0016020, GO:0004674, GO:0031227, GO:0016788, GO:0006505, GO:0006629, GO:0035556, GO:0004523, GO:0046873, GO:0000790, GO:0006338, GO:0004629, GO:0048188, GO:0051568
Pa_1_2820	GO:0046872, GO:0016787, GO:0003677, GO:0016021, GO:0005886, GO:0005739, GO:0005783, GO:0004519, GO:0005669, GO:0006352, GO:0031307, GO:0004629, GO:0004527, GO:0009651, GO:0046513, GO:0034480, GO:0004767, GO:0051278, GO:0030149
Pa_1_2830	GO:0005576, GO:0016829, GO:0003993, GO:0016158, GO:0008707
Pa_1_2840	GO:0016021, GO:0006810
Pa_1_2850	GO:0003824, GO:0004553, GO:0005975, GO:0043169
Pa_1_2860	GO:0016021, GO:0016020, GO:0004888, GO:0004930, GO:0007166
Pa_1_2870	GO:0005829, GO:0005634, GO:0005625, GO:0032153, GO:0005783, GO:0033554, GO:0045324, GO:0000139, GO:0016126, GO:0006696, GO:0000300, GO:0019898, GO:0015485, GO:0008142, GO:0070300, GO:0005546, GO:0070273, GO:0015248, GO:0010922, GO:0006869, GO:0032541, GO:0031234, GO:0043325, GO:0080025, GO:0010314, GO:0055092, GO:0016125, GO:0008289
Pa_1_2880	GO:0003824, GO:0030170, GO:0006520
Pa_1_2890	GO:0005829, GO:0005634, GO:0008270, GO:0003723, GO:0000166, GO:0030529, GO:0000349, GO:0045292, GO:0000243, GO:0005686
Pa_1_2900	GO:0046872, GO:0005829, GO:0016021, GO:0005488, GO:0016491, GO:0001950, GO:0005886, GO:0051286, GO:0005816, GO:0005739, GO:0045493, GO:0005509, GO:0005783, GO:0005794, GO:0033554, GO:0007126, GO:0005789, GO:0006906, GO:0031965, GO:0030659, GO:0008289, GO:0005933, GO:0005544, GO:0004048
Pa_1_2910	GO:0005488, GO:0005856, GO:0006909
Pa_1_2920	GO:0046872, GO:0016787, GO:0005634, GO:0003677, GO:0008270, GO:0003700, GO:0006508, GO:0004177, GO:0009987, GO:0008235, GO:0006629, GO:0035556, GO:0004629, GO:0018775
Pa_1_2930	GO:0016021, GO:0005886, GO:0030447, GO:0005794, GO:0006995, GO:0001403, GO:0007124, GO:0031670, GO:0005887, GO:0019740, GO:0008519, GO:0015200, GO:0072499, GO:0015398
Pa_1_2940	GO:0016787, GO:0005829, GO:0003677, GO:0016021, GO:0001950, GO:0005886, GO:0055085, GO:0006281, GO:0016301, GO:0005794, GO:0033554, GO:0005215, GO:0016620, GO:0009166, GO:0008271
Pa_1_295	GO:0016747, GO:0005975, GO:0043169, GO:0016746
Pa_1_2950	GO:0005829, GO:0005634, GO:0005622, GO:0042493, GO:0005488, GO:0005515, GO:0005816, GO:0005509, GO:0030448, GO:0007094, GO:0051301, GO:0007067, GO:0071937, GO:0031030, GO:0005097, GO:0007096, GO:0031578
Pa_1_2970	GO:0046872, GO:0016021, GO:0004872, GO:0005794, GO:0005789, GO:0006882, GO:0006631, GO:0044255, GO:0071294
Pa_1_30	GO:0016021, GO:0003824, GO:0016874
Pa_1_300	GO:0005634, GO:0003677, GO:0008270, GO:0003700, GO:0003676, GO:0006351
Pa_1_3000	GO:0005737, GO:0005634, GO:0016020, GO:0003755, GO:0006457, GO:0005730, GO:0042393, GO:0006334, GO:0045944, GO:0000183, GO:0005528, GO:0000412, GO:0005527, GO:0051598, GO:0000415
Pa_1_3010	GO:0005829, GO:0005634, GO:0042493, GO:0005515, GO:0005524, GO:0005816, GO:0060237, GO:0032889, GO:0000131, GO:0031505, GO:0005739, GO:0016301, GO:0004674, GO:0005730, GO:0042802, GO:0004672, GO:0005773, GO:0007035, GO:0030448, GO:0045132, GO:0008298, GO:0000753, GO:0007067, GO:0030428, GO:0007049, GO:0007163, GO:0005935, GO:0006357, GO:0071470, GO:0005934, GO:0043332, GO:0031097, GO:0051285, GO:…
Pa_1_3040	GO:0005737, GO:0046872, GO:0005886, GO:0005515, GO:0005524, GO:0005739, GO:0016301, GO:0000287, GO:0035556, GO:0007165, GO:0031137, GO:0004016, GO:0045014, GO:0016849, GO:0009190, GO:0007188
Pa_1_3050	GO:0003677, GO:0006355
Pa_1_3060	GO:0007017, GO:0005869
Pa_1_3070	GO:0005737, GO:0005840, GO:0003735, GO:0006412, GO:0006777, GO:0007017, GO:0000166, GO:0005869
Pa_1_3080	GO:0005525, GO:0046872, GO:0005634, GO:0016021, GO:0005515, GO:0005524, GO:0003824, GO:0006886, GO:0032153, GO:0051286, GO:0032258, GO:0016236, GO:0005789, GO:0006812, GO:0003924, GO:0000139, GO:0030242, GO:0015662, GO:0006754, GO:0017119, GO:0000301
Pa_1_3090	GO:0005525, GO:0050660, GO:0016616, GO:0016021, GO:0005506, GO:0016491, GO:0009055, GO:0005975, GO:0016772, GO:0003924
Pa_1_310	GO:0006508, GO:0004497, GO:0009055, GO:0020037, GO:0016705, GO:0070330, GO:0004252
Pa_1_3100	GO:0008270, GO:0005488, GO:0016491, GO:0004303, GO:0008667, GO:0009239
Pa_1_3110	GO:0005488, GO:0016491
Pa_1_3120	GO:0005524, GO:0016772, GO:0004672, GO:0004713
Pa_1_3130	GO:0005634, GO:0008270, GO:0003700, GO:0005488, GO:0003676, GO:0046983
Pa_1_3140	GO:0016491, GO:0009055, GO:0020037, GO:0016705, GO:0016702
Pa_1_3150	GO:0005524, GO:0006629, GO:0004435, GO:0035556, GO:0016887
Pa_1_3170	GO:0008033, GO:0004540
Pa_1_3180	GO:0008033, GO:0004540, GO:0004526
Pa_1_320	GO:0005829, GO:0005634, GO:0050660, GO:0008270, GO:0016491, GO:0004022, GO:0005739, GO:0070403, GO:0033554, GO:0051903, GO:0018467, GO:0003995, GO:0043295, GO:0042803, GO:0006069, GO:0046294, GO:0042867, GO:0018456, GO:0000947, GO:0033833, GO:0033859
Pa_1_3200	GO:0003677, GO:0005622, GO:0030261
Pa_1_3220	GO:0046872, GO:0005524, GO:0005789, GO:0005741, GO:0044267, GO:0016307
Pa_1_3230	GO:0042493, GO:0016491, GO:0031505, GO:0009405, GO:0006623, GO:0043328, GO:0006900, GO:0030448, GO:0031902, GO:0006612, GO:0016485, GO:0071467, GO:0071285, GO:0043162, GO:0000813, GO:0032403
Pa_1_3240	GO:0050660, GO:0042493, GO:0005488, GO:0005515, GO:0030447, GO:0005739, GO:0000287, GO:0030976, GO:0003984, GO:0005730, GO:0000054, GO:0030690, GO:0009082, GO:0030691, GO:0042255
Pa_1_3250	GO:0005829, GO:0005840, GO:0003735, GO:0006412, GO:0016021, GO:0016020, GO:0033554, GO:0005777, GO:0000139, GO:0031965, GO:0006450
Pa_1_3260	GO:0008270
Pa_1_3270	GO:0016740, GO:0005515, GO:0006355, GO:0006351, GO:0000124, GO:0046695, GO:0003712, GO:0016573, GO:0005671
Pa_1_3280	GO:0016740, GO:0008168
Pa_1_3290	GO:0005634, GO:0003677, GO:0008270, GO:0003700, GO:0006351
Pa_1_3300	GO:0008270, GO:0016021, GO:0016491, GO:0005886, GO:0009055, GO:0020037, GO:0006810, GO:0022900, GO:0022904, GO:0006099, GO:0045039, GO:0005740, GO:0005749, GO:0000104, GO:0048039, GO:0042721, GO:0043495, GO:0006121, GO:0008177, GO:0044238
Pa_1_3320	GO:0005737, GO:0005634, GO:0005759, GO:0005524, GO:0003723, GO:0016874, GO:0006418, GO:0006289, GO:0003684, GO:0006397, GO:0004831, GO:0006437, GO:0070184
Pa_1_3330	GO:0005829, GO:0005634, GO:0003677, GO:0008080, GO:0042493, GO:0006995, GO:0006355, GO:0006351, GO:0006284, GO:0034198, GO:0032006, GO:0097042, GO:0035859, GO:0070881, GO:0015824, GO:0015840
Pa_1_3340	GO:0005634, GO:0005515, GO:0006886, GO:0006896, GO:0010008, GO:0015031, GO:0051028, GO:0042147, GO:0000938
Pa_1_3350	GO:0005634, GO:0003677, GO:0008270, GO:0016021, GO:0003700, GO:0055085, GO:0005509, GO:0005507
Pa_1_3380	GO:0009986, GO:0005576, GO:0005886, GO:0042710, GO:0005618, GO:0031225, GO:0005935, GO:0000128, GO:0001403, GO:0007124, GO:0007155
Pa_1_3395	GO:0003677, GO:0005622, GO:0003700, GO:0004553, GO:0005975, GO:0043169, GO:0005509, GO:0006355, GO:0016773, GO:0043565, GO:0004803, GO:0015074, GO:0006313, GO:0005544
Pa_1_340	GO:0016740
Pa_1_3400	GO:0016740, GO:0005737, GO:0046872, GO:0005829, GO:0005634, GO:0009116, GO:0016757, GO:0003999, GO:0006168, GO:0006166, GO:0006167
Pa_1_3410	GO:0016787, GO:0005829, GO:0005975, GO:0016020, GO:0005509, GO:0004571, GO:0030246, GO:0004559, GO:0060205, GO:0005788, GO:0030433, GO:0006986, GO:0006517, GO:0006516
Pa_1_3430	GO:0005634, GO:0003677, GO:0008270, GO:0003700, GO:0006351, GO:0043565, GO:0006357, GO:0009098, GO:0009316, GO:0003861
Pa_1_3450	GO:0005634, GO:0008270, GO:0003700, GO:0005488, GO:0016491, GO:0005625, GO:0005975, GO:0008874, GO:0050085, GO:0047038, GO:0047002, GO:0019571, GO:0019528
Pa_1_3460	GO:0005737, GO:0005829, GO:0005634, GO:0003677, GO:0008270, GO:0003700, GO:0016491, GO:0005759, GO:0005515, GO:0009055, GO:0020037, GO:0005739, GO:0009636, GO:0009405, GO:0019825, GO:0016702, GO:0006950, GO:0005344, GO:0015671, GO:0004155, GO:0008941, GO:0071949, GO:0051409, GO:0016966, GO:0071500, GO:0046210, GO:0052565, GO:0070458
Pa_1_3470	GO:0016740, GO:0005634, GO:0008080, GO:0042493, GO:0006355, GO:0006351, GO:0007131, GO:0000790, GO:0006338, GO:0006357, GO:0032968, GO:0000124, GO:0046695, GO:0000775, GO:0003713, GO:0004402, GO:0005671, GO:0010484, GO:0070577, GO:0034401, GO:0044154, GO:0043971, GO:0043972, GO:0043970
Pa_1_3480	GO:0005634, GO:0006281, GO:0003684, GO:0008853
Pa_1_3490	GO:0005737, GO:0046872, GO:0005634, GO:0016491, GO:0005975, GO:0030246, GO:0016853, GO:0044262, GO:0047938
Pa_1_350	GO:0008168
Pa_1_3500	GO:0005524, GO:0004674, GO:0016772, GO:0009231, GO:0008686
Pa_1_3530	GO:0004123, GO:0080146, GO:0003849, GO:0009073
Pa_1_3550	GO:0016491, GO:0005524, GO:0006281, GO:0016301, GO:0008094, GO:0003684, GO:0005956, GO:0019887
Pa_1_3570	GO:0030447, GO:0006629, GO:0004435, GO:0035556, GO:0004629, GO:0004436
Pa_1_360	GO:0005634, GO:0008270, GO:0003700
Pa_1_3600	GO:0005737, GO:0005525, GO:0005829, GO:0005634, GO:0050660, GO:0016021, GO:0005506, GO:0016491, GO:0005515, GO:0000226, GO:0009055, GO:0005816, GO:0005874, GO:0051258, GO:0003924, GO:0000070, GO:0007163, GO:0046982, GO:0007018, GO:0005198, GO:0005828, GO:0045143, GO:0005200, GO:0005881, GO:0000743, GO:0048311, GO:0005880, GO:0005827
Pa_1_3610	GO:0003676, GO:0003723, GO:0005730, GO:0000166, GO:0006364, GO:0000463, GO:0030684
Pa_1_3640	GO:0042493, GO:0005488, GO:0008033, GO:0006379, GO:0005847, GO:0030847, GO:0030846, GO:0006378
Pa_1_3670	GO:0016021, GO:0008643, GO:0022857, GO:0005506, GO:0055085, GO:0030447, GO:0005783, GO:0033554, GO:0005215, GO:0016706
Pa_1_370	GO:0005488
Pa_1_3700	GO:0016616, GO:0005506, GO:0005488, GO:0016491, GO:0016829, GO:0016702, GO:0045329, GO:0031418, GO:0050353, GO:0005777, GO:0016853, GO:0003857, GO:0004300, GO:0006635, GO:0006631, GO:0033989, GO:0032934
Pa_1_3710	GO:0008270
Pa_1_3720	GO:0008270, GO:0003676
Pa_1_3730	GO:0005829, GO:0003743, GO:0030437, GO:0030286, GO:0030989
Pa_1_3740	GO:0015986, GO:0000276, GO:0015078
Pa_1_3750	GO:0005634, GO:0003677, GO:0008270, GO:0003700, GO:0006351
Pa_1_3770	GO:0003677, GO:0008270, GO:0016021, GO:0022857, GO:0005488, GO:0006397, GO:0005681, GO:0008380
Pa_1_3780	GO:0016740, GO:0008080
Pa_1_3790	GO:0005840, GO:0003735, GO:0006412, GO:0016491, GO:0009986, GO:0005730, GO:0022625
Pa_1_3800	GO:0005737, GO:0016787, GO:0005829, GO:0005634, GO:0016021, GO:0005488, GO:0005524, GO:0005816, GO:0003723, GO:0005643, GO:0006368, GO:0016881, GO:0006406, GO:0003690, GO:0000346, GO:0008180, GO:0000338
Pa_1_3810	GO:0016301
Pa_1_3820	GO:0016787
Pa_1_3830	GO:0005737, GO:0005829, GO:0005634, GO:0009966, GO:0016021, GO:0005506, GO:0016491, GO:0005515, GO:0006633, GO:0030071, GO:0000070, GO:0051301, GO:0007067, GO:0016791, GO:0008599, GO:0007059, GO:0004016, GO:0008287, GO:0071862, GO:0051457
Pa_1_3840	GO:0005737, GO:0005829, GO:0005634, GO:0008270, GO:0016491, GO:0005625, GO:0033554, GO:0008106, GO:0042732, GO:0016772, GO:0006950, GO:0003729, GO:0004032, GO:0019568, GO:0042843, GO:0047935, GO:0005623, GO:0047956, GO:0047838, GO:0032866, GO:0016696, GO:0046842
Pa_1_3850	GO:0005737, GO:0005829, GO:0005634, GO:0005622, GO:0008270, GO:0005515, GO:0032153, GO:0051286, GO:0005730, GO:0006355, GO:0006351, GO:0004221, GO:0006511, GO:0006897, GO:0008234, GO:0034613, GO:0000124, GO:0046695, GO:0004843, GO:0016579, GO:0051568, GO:0045013, GO:0071819, GO:0032947, GO:0016578, GO:0034729
Pa_1_3860	GO:0016021, GO:0005515, GO:0005524, GO:0006281, GO:0042626, GO:0016020, GO:0006810, GO:0016887, GO:0006310, GO:0009378, GO:0015908, GO:0005779
Pa_1_3870	GO:0046872, GO:0016021, GO:0005886, GO:0005515, GO:0055085, GO:0030447, GO:0005739, GO:0033554, GO:0015031, GO:0030437, GO:0005789, GO:0005743, GO:0009408, GO:0006470, GO:0006998, GO:0031965, GO:0004721, GO:0016791, GO:0009651, GO:0005744, GO:0030150, GO:0008287, GO:0030943, GO:0046890
Pa_1_3880	GO:0016021, GO:0055085, GO:0015031, GO:0005789, GO:0016758, GO:0030259
Pa_1_3890	GO:0005488, GO:0005515, GO:0005730, GO:0000723, GO:0007049, GO:0000783, GO:0005724
Pa_1_390	GO:0016301, GO:0016772
Pa_1_3900	GO:0005634, GO:0003677, GO:0005488
Pa_1_3910	GO:0046872, GO:0016021, GO:0005524, GO:0006812, GO:0015662, GO:0006754
Pa_1_3920	GO:0006357, GO:0016592, GO:0001104, GO:0008484, GO:0047753
Pa_1_3930	GO:0006357, GO:0016592, GO:0001104, GO:0008484
Pa_1_3940	GO:0016787, GO:0016747
Pa_1_3950	GO:0005737, GO:0005829, GO:0005634, GO:0042493, GO:0016491, GO:0005515, GO:0005524, GO:0005816, GO:0030447, GO:0006281, GO:0004674, GO:0007165, GO:0030448, GO:0000075, GO:0004713, GO:0007049, GO:0000910, GO:0004712, GO:0051519, GO:0005935, GO:0005654, GO:0008104, GO:0006270, GO:0000077, GO:0003688, GO:0009202, GO:2000766, GO:0046015, GO:0005940, GO:0005938, GO:0031578, GO:0031593, GO:0001558
Pa_1_3960	GO:0005737, GO:0005829, GO:0005634, GO:0005515, GO:0005524, GO:0030447, GO:0006281, GO:0006355, GO:0030435, GO:0006351, GO:0009411, GO:0000724, GO:0030071, GO:0000070, GO:0006950, GO:0030466, GO:0070987, GO:0042276, GO:0006301, GO:0000790, GO:0006338, GO:0051301, GO:0006348, GO:0006368, GO:0016881, GO:0006366, GO:0000502, GO:0043161, GO:0004842, GO:0042138, GO:0042787, GO:0010994, GO:0000209, GO:…
Pa_1_3970	GO:0008270, GO:0005840, GO:0003735, GO:0006412, GO:0002181, GO:0006807, GO:0016810, GO:0022625, GO:0006450
Pa_1_3980	GO:0005737, GO:0016021, GO:0005886, GO:0005509, GO:0005789, GO:0005096, GO:0051301, GO:0000282, GO:0007049, GO:0005935, GO:0005934, GO:0030010, GO:0004871
Pa_1_3990	GO:0005737, GO:0008180
Pa_1_40	GO:0016787, GO:0016021, GO:0008168, GO:0000287, GO:0015171, GO:0030430, GO:0016887, GO:0019079
Pa_1_400	GO:0050662, GO:0006886, GO:0031227, GO:0016788, GO:0006505, GO:0003857, GO:0006631
Pa_1_4000	GO:0046872, GO:0016021, GO:0005506, GO:0016491, GO:0005886, GO:0005524, GO:0016020, GO:0005794, GO:0006633, GO:0000329, GO:0000139, GO:0006879, GO:0005507, GO:0046686, GO:0006878, GO:0006825, GO:0015662, GO:0006754, GO:0004008, GO:0030001, GO:0012510, GO:0019829, GO:0015691, GO:0015673, GO:0008551
Pa_1_4010	GO:0005634, GO:0003677
Pa_1_4020	GO:0005737, GO:0005829, GO:0008080, GO:0005886, GO:0005524, GO:0005739, GO:0002181, GO:0004812, GO:0006418, GO:0032543, GO:0004825, GO:0006431, GO:0017102
Pa_1_4030	GO:0016884, GO:0016740, GO:0016787, GO:0005829, GO:0016021, GO:0005524, GO:0055085, GO:0016811, GO:0015171, GO:0004674, GO:0006631, GO:0004040
Pa_1_4040	GO:0005829, GO:0005634, GO:0005515, GO:0006281, GO:0005975, GO:0006342, GO:0030437, GO:0006355, GO:0006351, GO:0042802, GO:0043596, GO:0003682, GO:0000790, GO:0006357, GO:0006368, GO:0035067, GO:0016585, GO:0003714, GO:0016568, GO:0000775, GO:0034504, GO:0006336, GO:0033186, GO:0006335, GO:0070829, GO:0090053, GO:0090055, GO:0051574, GO:0000417
Pa_1_4050	GO:0016021, GO:0005524, GO:0042626, GO:0005739, GO:0009636, GO:0000324, GO:0005794, GO:0000329, GO:0032440, GO:0015432, GO:0015893, GO:0010038, GO:0071276, GO:0071996, GO:0071995, GO:0071997, GO:0071992
Pa_1_4060	GO:0008168
Pa_1_4080	GO:0050660, GO:0016747, GO:0008270, GO:0016491, GO:0004022, GO:0048037, GO:0005975, GO:0000287, GO:0030976, GO:0003984, GO:0000036, GO:0031177, GO:0009058, GO:0016868, GO:0009082, GO:0003960, GO:0050111
Pa_1_4090	GO:0005829, GO:0005634, GO:0008270, GO:0016021, GO:0022891, GO:0008643, GO:0042493, GO:0005515, GO:0003676, GO:0003723, GO:0006397, GO:0006379, GO:0005847, GO:0006378
Pa_1_410	GO:0008168, GO:0016702
Pa_1_4100	GO:0005488
Pa_1_4110	GO:0005737, GO:0005634, GO:0003677, GO:0016021, GO:0005515, GO:0005524, GO:0005816, GO:0007126, GO:0006355, GO:0030435, GO:0006351, GO:0000070, GO:0005507, GO:0031965, GO:0006754, GO:0004008, GO:0032806, GO:0007127
Pa_1_4130	GO:0008168
Pa_1_4140	GO:0005737, GO:0005829, GO:0005634, GO:0008270, GO:0003700, GO:0005515, GO:0003676, GO:0005794, GO:0000166, GO:0016874, GO:0051537
Pa_1_4150	GO:0016787, GO:0016021, GO:0005739, GO:0005783
Pa_1_4160	GO:0016972
Pa_1_4170	GO:0008270, GO:0006281, GO:0016874, GO:0003684, GO:0003887, GO:0004842, GO:0007031, GO:0005778, GO:0016558
Pa_1_4180	GO:0016021, GO:0005783, GO:0015031, GO:0005789, GO:0000329, GO:0006486, GO:0006621
Pa_1_420	GO:0050660, GO:0005524, GO:0004674, GO:0016614, GO:0006807, GO:0004672, GO:0030288, GO:0016810, GO:0015035, GO:0004713
Pa_1_4200	GO:0016787, GO:0030145, GO:0000287, GO:0005777, GO:0016818, GO:0009132, GO:0016462
Pa_1_4220	GO:0016021, GO:0005375
Pa_1_4230	GO:0005737, GO:0005634, GO:0005506, GO:0034354, GO:0019363, GO:0000334
Pa_1_4240	GO:0046872, GO:0016787, GO:0005634, GO:0008270, GO:0003824, GO:0016829, GO:0006281, GO:0005739, GO:0006355, GO:0016853, GO:0006950, GO:0018800, GO:0008704, GO:0047621
Pa_1_4260	GO:0005737, GO:0008270, GO:0005488, GO:0005524, GO:0004674, GO:0006397, GO:0005681, GO:0008380, GO:0016070
Pa_1_4270	GO:0016740, GO:0005634, GO:0006508, GO:0006281, GO:0006355, GO:0006351, GO:0008236, GO:0006397, GO:0016568
Pa_1_4280	GO:0005829, GO:0005634, GO:0005488, GO:0016491, GO:0006508, GO:0005576, GO:0005524, GO:0003676, GO:0004177, GO:0009405, GO:0033554, GO:0008026, GO:0008236
Pa_1_4290	GO:0005515, GO:0000724, GO:0000228, GO:0051301, GO:0007064, GO:0008608, GO:0016758, GO:0000794, GO:0000775, GO:0030259, GO:0030892
Pa_1_4300	GO:0046872, GO:0016021, GO:0005524, GO:0009055, GO:0020037, GO:0031505, GO:0030145, GO:0005509, GO:0006812, GO:0030448, GO:0000139, GO:0033205, GO:0050850, GO:0006486, GO:0009612, GO:0006874, GO:0015979, GO:0030176, GO:0015662, GO:0006754, GO:0005388, GO:0031361, GO:0015410, GO:0030026, GO:0008554
Pa_1_4320	GO:0003677, GO:0006366
Pa_1_4340	GO:0005737, GO:0005829, GO:0005634, GO:0008270, GO:0016491, GO:0008168, GO:0008757, GO:0010972
Pa_1_4360	GO:0006368, GO:0008023
Pa_1_4370	GO:0005737, GO:0005829, GO:0005634, GO:0030437, GO:0006810, GO:0005874, GO:0007017, GO:0003774, GO:0005875, GO:0030286, GO:0005868, GO:0030989, GO:0000743, GO:0030029, GO:0031122, GO:0019861
Pa_1_4380	GO:0005634, GO:0003676, GO:0003723, GO:0005730, GO:0000166, GO:0030529, GO:0006364, GO:0000480, GO:0000447, GO:0000472, GO:0030686, GO:0034462
Pa_1_4390	GO:0005634, GO:0003700, GO:0003676, GO:0000166
Pa_1_4410	GO:0005737, GO:0005829, GO:0005634, GO:0016021, GO:0005488, GO:0005759, GO:0005625, GO:0005816, GO:0005739, GO:0003755, GO:0006457, GO:0016788, GO:0015031, GO:0030437, GO:0006915, GO:0016853, GO:0005788, GO:0045292, GO:0016575, GO:0042277, GO:0019478, GO:0034967, GO:0045836, GO:0016018
Pa_1_4420	GO:0016740, GO:0016021, GO:0005886, GO:0003824, GO:0030447, GO:0016020, GO:0015205, GO:0015212, GO:0015856, GO:0006863, GO:0004057, GO:0016598, GO:0051183
Pa_1_4430	GO:0005737, GO:0046872, GO:0005634, GO:0050660, GO:0008270, GO:0016021, GO:0003676, GO:0006886, GO:0005783, GO:0008033, GO:0006400, GO:0017150
Pa_1_4440	GO:0005515, GO:0032153, GO:0071775, GO:0005874, GO:0007017, GO:0007163, GO:0010570, GO:0034613, GO:0051285, GO:0031500, GO:2000771
Pa_1_4450	GO:0016021, GO:0005739
Pa_1_4460	GO:0005737, GO:0005829, GO:0005634, GO:0005622, GO:0008270, GO:0003700, GO:0005515, GO:0003676, GO:0042254, GO:0033554, GO:0006355, GO:0043565, GO:0006383, GO:0008361, GO:0000978
Pa_1_4470	GO:0016021, GO:0005515, GO:0005524, GO:0008168, GO:0004497, GO:0009055, GO:0020037, GO:0016705, GO:0016020, GO:0005783, GO:0004674, GO:0070330, GO:0005789, GO:0006950, GO:0005792, GO:0016126, GO:0006696, GO:0008398
Pa_1_4490	GO:0005737, GO:0005829, GO:0008270, GO:0005515, GO:0005524, GO:0005816, GO:0005739, GO:0007126, GO:0005874, GO:0005871, GO:0003777, GO:0016887, GO:0045454, GO:0000070, GO:0000778, GO:0051301, GO:0007067, GO:0000915, GO:0007163, GO:0010570, GO:0008608, GO:0034613, GO:0051285, GO:0046982, GO:0007018, GO:0051233, GO:0051228, GO:0030472, GO:0000132, GO:0008574, GO:0000092, GO:0034504, GO:0030473, GO:…
Pa_1_45	GO:0005576, GO:0030248, GO:0004553, GO:0005975, GO:0016788, GO:0006629
Pa_1_4500	GO:0016021, GO:0055085, GO:0000324, GO:0005783, GO:0005794, GO:0005215, GO:0005774, GO:0000329
Pa_1_4510	GO:0005829, GO:0005634, GO:0005515, GO:0006260, GO:0043596, GO:0006261, GO:0006271, GO:0007049, GO:0006270, GO:0031261, GO:0000727, GO:0031298, GO:0000811, GO:0071169
Pa_1_4520	GO:0005737, GO:0005829, GO:0005634, GO:0005622, GO:0005759, GO:0005524, GO:0050821, GO:0008233, GO:0033554, GO:0006355, GO:0017111, GO:0016887, GO:0031072, GO:0051082, GO:0006950, GO:0005635, GO:0009408, GO:0072380, GO:0042026, GO:0034605, GO:0000002, GO:0019538, GO:0008134, GO:0034975, GO:0016485, GO:0051087, GO:0030150, GO:0042623, GO:0010892, GO:0043335, GO:0051787, GO:0051085, GO:0043531, GO:…
Pa_1_4530	GO:0005525, GO:0005829, GO:0005622, GO:0042493, GO:0005625, GO:0005515, GO:0006886, GO:0016192, GO:0051286, GO:0006623, GO:0005794, GO:0015031, GO:0016236, GO:0003924, GO:0000139, GO:0005802, GO:0007264, GO:0006888, GO:0030428, GO:0006891, GO:0051519, GO:0006893, GO:0004871, GO:0043001, GO:0005798
Pa_1_4540	GO:0016021, GO:0005886, GO:0006886, GO:0004872, GO:0015031, GO:0006810, GO:0005789, GO:0000139, GO:0006888, GO:0030134, GO:0006621, GO:0016050
Pa_1_4560	GO:0005737, GO:0005829, GO:0005634, GO:0006412, GO:0001950, GO:0009986, GO:0005576, GO:0030446, GO:0005886, GO:0030445, GO:0005515, GO:0044416, GO:0005524, GO:0009277, GO:0005739, GO:0009636, GO:0006457, GO:0005794, GO:0033554, GO:0002181, GO:0016887, GO:0051082, GO:0006950, GO:0005844, GO:0000329, GO:0005788, GO:0030433, GO:0042026, GO:0006626, GO:0005624, GO:0031965, GO:0034605, GO:0032440, GO:…
Pa_1_4570	GO:0016021, GO:0005515, GO:0005777, GO:0005778, GO:0016560
Pa_1_4580	GO:0006367, GO:0003743, GO:0005672
Pa_1_4590	GO:0005737, GO:0005634, GO:0005515, GO:0005524, GO:0032153, GO:0005816, GO:0006457, GO:0030437, GO:0007126, GO:0051082, GO:0000070, GO:0016567, GO:0031137, GO:0000022, GO:0000778, GO:0007094, GO:0051301, GO:0033597, GO:0034613, GO:0008047, GO:0030476, GO:0033314, GO:0008361, GO:0030674, GO:0007096, GO:0030163, GO:0045732, GO:0005680, GO:0008054, GO:0045736, GO:0007127, GO:0007092, GO:0000089, GO:…
Pa_1_4610	GO:0005737, GO:0005829, GO:0005634, GO:0005524, GO:0004674, GO:0016874, GO:0004252, GO:0006511, GO:0007346, GO:0051301, GO:0007049, GO:0004842, GO:0031463, GO:0042787, GO:0031461, GO:0031625, GO:0019005, GO:0032876
Pa_1_4620	GO:0008270, GO:0005759, GO:0051082, GO:0005744, GO:0030150
Pa_1_4630	GO:0005737, GO:0003677, GO:0042493, GO:0005488, GO:0005515, GO:0030515, GO:0004518, GO:0005730, GO:0006289, GO:0006364, GO:0032040, GO:0000480, GO:0000447, GO:0000472, GO:0030686, GO:0005654, GO:0030688
Pa_1_4640	GO:0016787, GO:0005634, GO:0008270, GO:0005524, GO:0003824, GO:0003676, GO:0033554, GO:0004674, GO:0007126, GO:0045292
Pa_1_4650	GO:0005737, GO:0005829, GO:0005634, GO:0005622, GO:0005515, GO:0000079, GO:0035556, GO:0051301, GO:0007067, GO:0033314, GO:0000086, GO:0008361, GO:0004725, GO:0000087, GO:0031662, GO:0004792
Pa_1_4660	GO:0005829, GO:0003677, GO:0008270, GO:0005515, GO:0005730, GO:0000166, GO:0006351, GO:0004221, GO:0006511, GO:0003887, GO:0008234, GO:0042790, GO:0000182, GO:0009303
Pa_1_4670	GO:0005737, GO:0005829, GO:0005634, GO:0005515, GO:0005739, GO:0006511, GO:0007346, GO:0003729, GO:0005839, GO:0004298, GO:0051603, GO:0000502, GO:0034515, GO:0043161, GO:0010499, GO:0019773, GO:0042175
Pa_1_4680	GO:0050660, GO:0003677, GO:0008270, GO:0016021, GO:0005524, GO:0055085, GO:0004674, GO:0016614, GO:0016772, GO:0004672, GO:0015074, GO:0003993
Pa_1_4690	GO:0005622, GO:0006464, GO:0004497, GO:0009055, GO:0020037, GO:0016705, GO:0016702, GO:0004601, GO:0016810, GO:0016881, GO:0006979, GO:0033751, GO:0042744, GO:0001516
Pa_1_470	GO:0050660, GO:0008812, GO:0006066, GO:0046562, GO:0016614, GO:0047682
Pa_1_4720	GO:0050660, GO:0016614
Pa_1_4730	GO:0005634, GO:0008270, GO:0016021, GO:0003700, GO:0055085
Pa_1_4740	GO:0046872, GO:0016491, GO:0016829, GO:0016702, GO:0000908, GO:0000907, GO:0044273
Pa_1_4750	GO:0016021
Pa_1_4760	GO:0005840, GO:0003735, GO:0006412, GO:0022625, GO:0005639, GO:0046677, GO:0046898
Pa_1_4770	GO:0016740, GO:0009986, GO:0005576, GO:0005886, GO:0042710, GO:0003824, GO:0030248, GO:0004553, GO:0005975, GO:0005618, GO:0031225, GO:0008061, GO:0005529, GO:0005935, GO:0000128, GO:0001403, GO:0007124, GO:0007155, GO:0010339
Pa_1_4780	GO:0046872, GO:0003677, GO:0051287, GO:0016616, GO:0005576, GO:0030248, GO:0004553, GO:0005975, GO:0008061, GO:0045493, GO:0016998, GO:0016810, GO:0046555, GO:0050119, GO:0004099
Pa_1_4790	GO:0005634, GO:0003700, GO:0043565, GO:0046983
Pa_1_480	GO:0016787, GO:0016491, GO:0006508, GO:0007047, GO:0016998, GO:0006629, GO:0035556, GO:0004252, GO:0008081, GO:0004629, GO:0004338
Pa_1_4810	GO:0016787, GO:0005634, GO:0003677, GO:0008270, GO:0003700, GO:0005576, GO:0005524, GO:0030248, GO:0004553, GO:0030245, GO:0005975, GO:0046556, GO:0045493, GO:0006879, GO:0008422, GO:0006541, GO:0006270, GO:0008199, GO:0006826, GO:0009044
Pa_1_4820	GO:0008270
Pa_1_4830	GO:0005737, GO:0016787, GO:0005829, GO:0005634, GO:0005488, GO:0005515, GO:0006457, GO:0006289, GO:0031072, GO:0006950, GO:0003684, GO:0009408, GO:0072380, GO:0003729, GO:0004721, GO:0043161, GO:0006620, GO:0030544, GO:0051879, GO:0042030
Pa_1_4840	GO:0046872, GO:0016787, GO:0005829, GO:0005634, GO:0003824, GO:0033554, GO:0005777, GO:0001302, GO:0019358, GO:0006348, GO:0000183, GO:0019363, GO:0008936
Pa_1_4850	GO:0006695, GO:0016021, GO:0042493, GO:0050662, GO:0005886, GO:0005515, GO:0031505, GO:0005789, GO:0050661, GO:0005635, GO:0008299, GO:0016126, GO:0006696, GO:0031965, GO:0004420, GO:0015936, GO:0008158, GO:0042282, GO:0010142, GO:0019287
Pa_1_4860	GO:0016021, GO:0005524, GO:0055085, GO:0009055, GO:0020037, GO:0016705, GO:0006281, GO:0005783, GO:0006629, GO:0005215, GO:0030870, GO:0004435, GO:0035556, GO:0005887
Pa_1_4870	GO:0004091, GO:0006508, GO:0005576, GO:0005524, GO:0030248, GO:0004553, GO:0030245, GO:0005975, GO:0045493, GO:0045490, GO:0016998, GO:0008236, GO:0005694, GO:0046555, GO:0030600
Pa_1_4890	GO:0005634, GO:0003677, GO:0008270, GO:0016021, GO:0008643, GO:0005524, GO:0055085, GO:0004553, GO:0005975, GO:0043169, GO:0004674, GO:0016788, GO:0005215, GO:0006351, GO:0016620, GO:0006397
Pa_1_4910	GO:0005737, GO:0005829, GO:0003677, GO:0042797, GO:0003899, GO:0006383, GO:0005666
Pa_1_4920	GO:0005737, GO:0005829, GO:0005634, GO:0005488, GO:0006508, GO:0005759, GO:0005625, GO:0009986, GO:0005739, GO:0003723, GO:0008233, GO:0003755, GO:0006457, GO:0015031, GO:0030437, GO:0000166, GO:0006915, GO:0016853, GO:0005788, GO:0016575, GO:0042277, GO:0034967, GO:0045836, GO:0016018
Pa_1_4930	GO:0005622, GO:0008270, GO:0005515, GO:0003824, GO:0003676, GO:0030276, GO:0016020, GO:0005794, GO:0015031, GO:0005096, GO:0006895, GO:0007015, GO:0030479, GO:0006897, GO:0000147, GO:0005546, GO:0080025, GO:0032266, GO:0034498, GO:0030125, GO:0032511
Pa_1_4940	GO:0005634, GO:0008270, GO:0003700
Pa_1_4960	GO:0008080
Pa_1_50	GO:0016021, GO:0055085, GO:0004872
Pa_1_500	GO:0016787, GO:0005576, GO:0030248, GO:0004553, GO:0030245, GO:0005975, GO:0016798
Pa_1_5000	GO:0005488, GO:0004721
Pa_1_5015	GO:0005524, GO:0004672, GO:0004713
Pa_1_5020	GO:0050660, GO:0016021, GO:0005506, GO:0016491, GO:0009055, GO:0016020, GO:0005509
Pa_1_5030	GO:0008168
Pa_1_5070	GO:0005524, GO:0004674, GO:0003746
Pa_1_5100	GO:0016740, GO:0005829, GO:0005634, GO:0042493, GO:0005488, GO:0005625, GO:0008061, GO:0042803, GO:0034599, GO:0042128, GO:0003746, GO:0008104, GO:0003714, GO:0046982, GO:0004364, GO:0006808, GO:0004602, GO:0051219, GO:0042994, GO:0032447, GO:0010044
Pa_1_5110	GO:0016740, GO:0005737, GO:0005829, GO:0016747, GO:0008270, GO:0005488, GO:0016491, GO:0048037, GO:0003824, GO:0030170, GO:0000036, GO:0031177, GO:0009058, GO:0016874, GO:0009085, GO:0019878, GO:0004043, GO:0000062
Pa_1_5120	GO:0016020, GO:0004601
Pa_1_5130	GO:0006508, GO:0004180, GO:0008236
Pa_1_5140	GO:0005737, GO:0016616, GO:0008270, GO:0016491, GO:0004022, GO:0048037, GO:0006067, GO:0006116, GO:0005759, GO:0005625, GO:0001950, GO:0019170, GO:0043458, GO:0009986, GO:0005576, GO:0030446, GO:0005886, GO:0030445, GO:0005515, GO:0042710, GO:0006096, GO:0044416, GO:0008926, GO:0000287, GO:0030976
Pa_1_5150	GO:0008270, GO:0016491, GO:0004022
Pa_1_5160	GO:0005634, GO:0003677, GO:0008270, GO:0003700, GO:0006351
Pa_1_5170	GO:0016021, GO:0022891, GO:0008643, GO:0022857, GO:0015293
Pa_1_5180	GO:0009116, GO:0004553, GO:0005975, GO:0043169, GO:0030246, GO:0004565, GO:0009341
Pa_1_5190	GO:0046872, GO:0016787, GO:0005634, GO:0008270, GO:0003700, GO:0006508, GO:0003824, GO:0030170, GO:0016829, GO:0008237, GO:0043565, GO:0009085, GO:0004794, GO:0009014, GO:0008777
Pa_1_520	GO:0008080, GO:0016491
Pa_1_5200	GO:0051287, GO:0008270, GO:0016021, GO:0022891, GO:0008643, GO:0005886, GO:0000105, GO:0015793, GO:0004399, GO:0015295
Pa_1_5210	GO:0016740, GO:0016787, GO:0016747, GO:0008270, GO:0005488, GO:0016491, GO:0048037, GO:0003824, GO:0008168, GO:0016746, GO:0006629, GO:0035556, GO:0000036, GO:0031177, GO:0009058, GO:0016874, GO:0050637, GO:0047462, GO:0006633, GO:0008757, GO:0030639, GO:0050564, GO:0004629, GO:0004318, GO:0004043
Pa_1_5220	GO:0016787, GO:0004177, GO:0016746
Pa_1_5230	GO:0016740, GO:0016021, GO:0003824, GO:0055085, GO:0009055, GO:0020037, GO:0016705, GO:0006629, GO:0005215, GO:0004435, GO:0035556
Pa_1_5260	GO:0006629, GO:0008081
Pa_1_5270	GO:0005576
Pa_1_5280	GO:0016787, GO:0005829, GO:0005515, GO:0005816, GO:0003723, GO:0006396, GO:0005730, GO:0004519, GO:0070478, GO:0004527, GO:0000177, GO:0000176, GO:0000175, GO:0000467, GO:0070651, GO:0071042, GO:0071035, GO:0071038, GO:0070481, GO:0071028, GO:0071039, GO:0071051, GO:0034475, GO:0034476, GO:0004654, GO:0034473
Pa_1_5290	GO:0005524, GO:0009055, GO:0005739, GO:0000324, GO:0006457, GO:0005783, GO:0017111, GO:0010181, GO:0045454, GO:0016853, GO:0015035, GO:0006662, GO:0005788, GO:0003756, GO:0034605
Pa_1_530	GO:0016787, GO:0005634, GO:0003677, GO:0008270, GO:0003700, GO:0016977
Pa_1_5300	GO:0006904
Pa_1_5320	GO:0005737, GO:0046872, GO:0016787, GO:0005829, GO:0005634, GO:0005515, GO:0008237, GO:0005739, GO:0016301, GO:0008233, GO:0007346, GO:0000502, GO:0034515, GO:0043161, GO:0000266, GO:0016559, GO:0046677, GO:0008180, GO:0010388, GO:0034399, GO:0008541, GO:0004843, GO:0071947, GO:0016579, GO:0046898
Pa_1_5330	GO:0005737, GO:0016787, GO:0005829, GO:0005634, GO:0003677, GO:0008270, GO:0005515, GO:0030447, GO:0009405, GO:0006355, GO:0006351, GO:0030702, GO:0001302, GO:0000070, GO:0030466, GO:0045128, GO:0006338, GO:0070211, GO:0006348, GO:0006357, GO:0006368, GO:0045944, GO:0060303, GO:0003714, GO:0000122, GO:0004407, GO:0048869, GO:0034503, GO:0060258, GO:0031939, GO:0046969, GO:0046970, GO:0051570, GO:…
Pa_1_5340	GO:0016787, GO:0016746, GO:0008233
Pa_1_5350	GO:0008233
Pa_1_5360	GO:0016021, GO:0006508, GO:0005524, GO:0032153, GO:0051286, GO:0003723, GO:0033554, GO:0005789, GO:0008026, GO:0004185
Pa_1_5370	GO:0006508, GO:0016020, GO:0004190, GO:0005044
Pa_1_5390	GO:0005737, GO:0005829, GO:0005634, GO:0016616, GO:0008270, GO:0005488, GO:0006096, GO:0006089, GO:0044262, GO:0004459, GO:0006099
Pa_1_5400	GO:0016021, GO:0005886, GO:0055085, GO:0004553, GO:0005975, GO:0043169, GO:0005783, GO:0005794, GO:0015171, GO:0015193, GO:0019676, GO:0006562, GO:0003844, GO:0006865
Pa_1_5420	GO:0005737, GO:0016787, GO:0005829, GO:0005634, GO:0016021, GO:0016491, GO:0006067, GO:0005759, GO:0005625, GO:0055085, GO:0005794, GO:0033554, GO:0045329, GO:0005215, GO:0016620, GO:0004029, GO:0008886, GO:0004030, GO:0004028, GO:0019483, GO:0006081, GO:0006598, GO:0003842, GO:0033721, GO:0019413, GO:0008802, GO:0042645, GO:0009166, GO:0006090, GO:0006740, GO:0006068
Pa_1_5430	GO:0016787, GO:0008080, GO:0003824, GO:0001760
Pa_1_5440	GO:0016787, GO:0016810
Pa_1_5450	GO:0005506, GO:0016705, GO:0031418, GO:0016706, GO:0004656
Pa_1_5460	GO:0005488, GO:0016491
Pa_1_5470	GO:0005737, GO:0016787, GO:0005829, GO:0005634, GO:0008270, GO:0016491, GO:0006508, GO:0005515, GO:0005524, GO:0030447, GO:0031505, GO:0004177, GO:0005509, GO:0009405, GO:0004674, GO:0007126, GO:0007165, GO:0034599, GO:0007346, GO:0031098, GO:0030428, GO:0005516, GO:0019722, GO:0051519, GO:0007088, GO:0033314, GO:0000077, GO:0004683, GO:0007231, GO:0040020, GO:0048478, GO:0010972, GO:0005954
Pa_1_5490	GO:0005840, GO:0003735, GO:0006412, GO:0005488, GO:0016491, GO:0000166, GO:0030283, GO:0008709, GO:0004316, GO:0042438, GO:0047039
Pa_1_550	GO:0003677, GO:0030261
Pa_1_5500	GO:0005634, GO:0003677, GO:0008270, GO:0016021, GO:0003700, GO:0005524, GO:0055085, GO:0042626, GO:0043130, GO:0042802, GO:0008092, GO:0030674
Pa_1_5510	GO:0005488, GO:0003676, GO:0016874, GO:0004523
Pa_1_5540	GO:0016021, GO:0009055, GO:0020037, GO:0016705, GO:0016811, GO:0006457, GO:0005789, GO:0051082, GO:0000139, GO:0016272, GO:0006672, GO:0046514, GO:0070774, GO:0050291
Pa_1_5555	GO:0009055, GO:0020037, GO:0016705
Pa_1_5560	GO:0016787, GO:0005488, GO:0005524, GO:0016301, GO:0006629, GO:0006915, GO:0042802, GO:0017111
Pa_1_5590	GO:0016021, GO:0022891, GO:0008643, GO:0022857, GO:0000287, GO:0015293, GO:0004749, GO:0009156
Pa_1_560	GO:0005829, GO:0005488, GO:0005794, GO:0003917
Pa_1_5600	GO:0016884, GO:0016021, GO:0016491, GO:0003824, GO:0015171, GO:0016853
Pa_1_5620	GO:0008898
Pa_1_5630	GO:0005488, GO:0016491
Pa_1_5640	GO:0016787, GO:0030170, GO:0004351, GO:0006536
Pa_1_5650	GO:0046872, GO:0050660, GO:0008762, GO:0009116, GO:0016021, GO:0005524, GO:0055085, GO:0016301, GO:0000287, GO:0000324, GO:0004674, GO:0005789, GO:0005215, GO:0005774, GO:0000329, GO:0008324, GO:0006874, GO:0004749, GO:0009156, GO:0015369, GO:0015386, GO:0015085, GO:0003968
Pa_1_5670	GO:0005525, GO:0005634, GO:0009116, GO:0005622, GO:0008270, GO:0005515, GO:0003824, GO:0042254, GO:0006886, GO:0016757, GO:0016020, GO:0016301, GO:0031227, GO:0016788, GO:0006505, GO:0006629, GO:0005730, GO:0035556, GO:0050661, GO:0046873, GO:0006511, GO:0000027, GO:0004629, GO:0031461, GO:0031625, GO:0009165, GO:0006545, GO:0004146
Pa_1_5680	GO:0016740, GO:0046872, GO:0005829, GO:0005634, GO:0005515, GO:0003824, GO:0005739, GO:0009405, GO:0033554, GO:0030437, GO:0005992, GO:0030448, GO:0034599, GO:0006950, GO:0071470, GO:0034605, GO:0003825, GO:0004805, GO:0005946, GO:0030234
Pa_1_5690	GO:0005737, GO:0005829, GO:0005634, GO:0005759, GO:0030170, GO:0016829, GO:0034644, GO:0009097, GO:0009082, GO:0009098, GO:0009403, GO:0031571, GO:0004084, GO:0009081, GO:0052656, GO:0052654, GO:0052655, GO:0009099, GO:0009083
Pa_1_5700	GO:0016021, GO:0016020, GO:0015079
Pa_1_5720	GO:0005524, GO:0006298, GO:0030983
Pa_1_5740	GO:0046872, GO:0005634, GO:0008270, GO:0016491, GO:0005576, GO:0004497, GO:0030248, GO:0004553, GO:0005975, GO:0005529, GO:0016788, GO:0005507, GO:0052716, GO:0008471, GO:0042438, GO:0004503, GO:0004097
Pa_1_5750	GO:0005737, GO:0005829, GO:0005634, GO:0008168, GO:0005730, GO:0000447, GO:0000282, GO:0000056, GO:0016435, GO:0070476
Pa_1_5760	GO:0016021, GO:0031505, GO:0015031, GO:0030173, GO:0006888, GO:0031965, GO:0006486, GO:0045053, GO:0004437, GO:0030134, GO:0030176, GO:0097020
Pa_1_5770	GO:0016021, GO:0016020, GO:0004888, GO:0004930, GO:0007166
Pa_1_5780	GO:0050660, GO:0016491, GO:0004497, GO:0050661, GO:0004499, GO:0055114
Pa_1_5790	GO:0016021, GO:0055085, GO:0003993
Pa_1_580	GO:0005525, GO:0016787, GO:0050660, GO:0008270, GO:0005488, GO:0005524, GO:0003676, GO:0050661, GO:0006915, GO:0046930, GO:0015267, GO:0006812, GO:0052331, GO:0046931, GO:0004499, GO:0006952, GO:0005871, GO:0003777, GO:0042802, GO:0017111, GO:0004523
Pa_1_5810	GO:0006508, GO:0005576, GO:0004252, GO:0042802, GO:0043086
Pa_1_5820	GO:0005525, GO:0050660, GO:0016616, GO:0016021, GO:0005506, GO:0016491, GO:0005524, GO:0009055, GO:0005975, GO:0016772, GO:0004672, GO:0003924, GO:0046933, GO:0015991, GO:0033180, GO:0046961
Pa_1_5830	GO:0005488
Pa_1_5840	GO:0005737, GO:0005634, GO:0051287, GO:0016616, GO:0016021, GO:0005886, GO:0016020, GO:0043169, GO:0005794, GO:0000166, GO:0000329, GO:0006893, GO:0005978, GO:0005980, GO:0004134, GO:0004135
Pa_1_5850	GO:0051287, GO:0016616, GO:0005759, GO:0005515, GO:0005739, GO:0003723, GO:0000287, GO:0009085, GO:0006537, GO:0006099, GO:0042645, GO:0004449, GO:0006102, GO:0005962, GO:0047046, GO:0004450, GO:0009027
Pa_1_5855	GO:0003677, GO:0005622, GO:0003700, GO:0004553, GO:0005975, GO:0043169, GO:0005509, GO:0006355, GO:0016773, GO:0043565, GO:0004803, GO:0015074, GO:0006313, GO:0005544
Pa_1_5890	GO:0005737, GO:0005829, GO:0005634, GO:0050660, GO:0008762, GO:0042493, GO:0005515, GO:0005524, GO:0032153, GO:0005816, GO:0030447, GO:0000131, GO:0031505, GO:0016301, GO:0033554, GO:0004674, GO:0007126, GO:0004672, GO:0000902, GO:0007067, GO:0007163, GO:0051519, GO:0030479, GO:0043332, GO:0034613, GO:0019236, GO:0051666, GO:0015629, GO:0005083, GO:0008154, GO:0006461, GO:0051285, GO:0000920, GO:…
Pa_1_5900	GO:0005737, GO:0005634, GO:0005515, GO:0033554, GO:0043130, GO:0006511, GO:0043161
Pa_1_5910	GO:0005737, GO:0005829, GO:0005634, GO:0005488, GO:0007346, GO:0000502, GO:0043161, GO:0043248, GO:0032947
Pa_1_5920	GO:0005829, GO:0005515, GO:0000932, GO:0003676, GO:0005739, GO:0007005, GO:0003723, GO:0000166, GO:0000184, GO:0048471, GO:0010494, GO:0034063, GO:0003729, GO:0000243, GO:0005685, GO:0000395, GO:0071004, GO:0006376, GO:0070935, GO:2000815, GO:0048026, GO:0061158, GO:0030530, GO:0008266, GO:0043488
Pa_1_5930	GO:0016846, GO:0003993, GO:0016291, GO:0006637
Pa_1_5940	GO:0046872, GO:0004022
Pa_1_5950	GO:0016021, GO:0032153, GO:0051286, GO:0005794, GO:0015171
Pa_1_5960	GO:0006508, GO:0005886, GO:0004553, GO:0005975, GO:0031225, GO:0046658, GO:0009405, GO:0030246, GO:0004190, GO:0005199, GO:0044267
Pa_1_5970	GO:0005576, GO:0020037, GO:0004601, GO:0006979, GO:0046274, GO:0042744, GO:0016689, GO:0016690, GO:0033747
Pa_1_5980	GO:0005524, GO:0004672
Pa_1_5990	GO:0016787, GO:0005576, GO:0030248, GO:0004553, GO:0030245, GO:0008810, GO:0005975, GO:0043169, GO:0033903
Pa_1_60	GO:0003676, GO:0000166
Pa_1_600	GO:0016787, GO:0003824, GO:0004620, GO:0009395
Pa_1_6000	GO:0016787, GO:0005634, GO:0003677, GO:0008270, GO:0003700, GO:0004104, GO:0004091, GO:0004806, GO:0047739, GO:0016042, GO:0005576
Pa_1_6020	GO:0005634, GO:0016021, GO:0006281, GO:0016020, GO:0000324, GO:0005794, GO:0005774, GO:0000329, GO:0008081, GO:0015297, GO:0008324, GO:0016706, GO:0006904, GO:0007031, GO:0005778, GO:0015238
Pa_1_6050	GO:0016021, GO:0016020, GO:0000324, GO:0005215, GO:0008863, GO:0006821
Pa_1_6070	GO:0016021, GO:0042493, GO:0005886, GO:0055085, GO:0009405, GO:0005215, GO:0000329, GO:0005624, GO:0015297, GO:0007155, GO:0008645, GO:0017153, GO:0000297
Pa_1_6080	GO:0016021, GO:0055085, GO:0008233, GO:0009279
Pa_1_6090	GO:0016787, GO:0050660, GO:0008762, GO:0016021, GO:0008168, GO:0000287, GO:0015171, GO:0030430, GO:0016887, GO:0019079
Pa_1_610	GO:0005634, GO:0005840, GO:0003735, GO:0006412, GO:0005739, GO:0008233, GO:0002181, GO:0022625
Pa_1_6100	GO:0005634, GO:0006355
Pa_1_6120	GO:0005634, GO:0016829, GO:0016702, GO:0006355, GO:0006950, GO:0009231, GO:0008840, GO:0008700, GO:0003935
Pa_1_6130	GO:0005634, GO:0003677
Pa_1_6140	GO:0016021, GO:0055085, GO:0015031, GO:0005743, GO:0001405, GO:0030150
Pa_1_615	GO:0046872, GO:0005829, GO:0051287, GO:0016616, GO:0005759, GO:0005739, GO:0006520, GO:0006108, GO:0006099, GO:0006090, GO:0016619, GO:0042566, GO:0004473, GO:0004470
Pa_1_6150	GO:0016740, GO:0005737, GO:0046872, GO:0005829, GO:0005634, GO:0005622, GO:0005488, GO:0005515, GO:0005524, GO:0003824, GO:0006777, GO:0016779, GO:0034599, GO:0008033, GO:0001403, GO:0007124, GO:0007114, GO:0005097, GO:0004792, GO:0032447, GO:0016783, GO:0070733, GO:0042292, GO:0018192, GO:0002143
Pa_1_6170	GO:0005737, GO:0005634, GO:0006508, GO:0007126, GO:0005089, GO:0035023, GO:0035556, GO:0008234, GO:0000338, GO:0019784
Pa_1_6190	GO:0005829, GO:0005634, GO:0051287, GO:0050662, GO:0006116, GO:0005739, GO:0005777, GO:0042803, GO:0071470, GO:0006114, GO:0006973, GO:0009331, GO:0004367, GO:0046168, GO:0009992, GO:0006072
Pa_1_620	GO:0016740, GO:0016021, GO:0005524, GO:0020037, GO:0016757, GO:0042626, GO:0004601, GO:0006979
Pa_1_6200	GO:0016740, GO:0005737, GO:0016787, GO:0005634, GO:0005524, GO:0016020, GO:0043169, GO:0005739, GO:0004672, GO:0005978, GO:0005980, GO:0004134, GO:0004135
Pa_1_6220	GO:0005634, GO:0008270, GO:0003700, GO:0008080
Pa_1_6230	GO:0050660, GO:0004553, GO:0005975, GO:0043169, GO:0016614
Pa_1_6240	GO:0016021, GO:0003700, GO:0006457, GO:0005789, GO:0031072, GO:0051082, GO:0043565
Pa_1_6250	GO:0005737, GO:0016021, GO:0006457, GO:0005789, GO:0031072, GO:0051082, GO:0004615, GO:0019307
Pa_1_6280	GO:0016020, GO:0046873
Pa_1_630	GO:0005634, GO:0008270, GO:0016021, GO:0003700, GO:0005488, GO:0005886, GO:0003676, GO:0055085, GO:0006886, GO:0031227, GO:0016788, GO:0006505, GO:0005215, GO:0005887, GO:0015238, GO:0010107, GO:0008028, GO:0032973
Pa_1_6300	GO:0046872, GO:0005829, GO:0005634, GO:0008270, GO:0005739, GO:0004784, GO:0006801, GO:0005507, GO:0019430, GO:0055114
Pa_1_6310	GO:0005525, GO:0003743, GO:0005622, GO:0047739, GO:0008168, GO:0003676, GO:0007264, GO:0016407
Pa_1_6320	GO:0016021, GO:0005886, GO:0055085, GO:0005215
Pa_1_6330	GO:0005737, GO:0005525, GO:0005622, GO:0006412, GO:0016021, GO:0006508, GO:0005739, GO:0004190, GO:0003924, GO:0005743, GO:0003746, GO:0032543, GO:0005452
Pa_1_6340	GO:0051287, GO:0016616, GO:0005759, GO:0005515, GO:0005739, GO:0003723, GO:0000287, GO:0009085, GO:0006537, GO:0006099, GO:0042645, GO:0004449, GO:0006102, GO:0005962, GO:0047046, GO:0004450, GO:0009027, GO:0050319
Pa_1_6350	GO:0004872
Pa_1_6360	GO:0005840, GO:0003735, GO:0006412, GO:0005763, GO:0032543
Pa_1_6380	GO:0005737, GO:0005634, GO:0008270, GO:0016021, GO:0003700, GO:0030170, GO:0008483, GO:0055085, GO:0006729, GO:0017153, GO:0008124, GO:0016149
Pa_1_6390	GO:0005737, GO:0005829, GO:0005634, GO:0016491, GO:0001950, GO:0005576, GO:0030446, GO:0005515, GO:0005739, GO:0033554, GO:0010181, GO:0030466, GO:0042393, GO:0045892, GO:0045121, GO:0071238, GO:0050625
Pa_1_6400	GO:0005737, GO:0005634, GO:0016772
Pa_1_6410	GO:0016884, GO:0016740, GO:0046872, GO:0016787, GO:0005829, GO:0006412, GO:0005524, GO:0016829, GO:0009405, GO:0016811, GO:0003755, GO:0006457, GO:0006355, GO:0004075, GO:0004039, GO:0004847, GO:0071469, GO:0019740, GO:0043419, GO:0006525, GO:0050567, GO:0004040, GO:0033009
Pa_1_6420	GO:0005576, GO:0005886, GO:0030248, GO:0004553, GO:0005975
Pa_1_6430	GO:0005525, GO:0005622, GO:0006508, GO:0005576, GO:0005886, GO:0031225, GO:0009277, GO:0046658, GO:0008237, GO:0009405, GO:0004190, GO:0003924, GO:0030287, GO:0043171, GO:0003746, GO:0005199, GO:0020012, GO:0044267, GO:0006465, GO:0000754, GO:0002253, GO:0052391, GO:0016485
Pa_1_6450	GO:0042493, GO:0003824, GO:0030170, GO:0008483, GO:0009058, GO:0016769, GO:0016847, GO:0004069
Pa_1_6460	GO:0016021, GO:0008080, GO:0005524, GO:0042626, GO:0016020, GO:0006810, GO:0005789, GO:0016887, GO:0008299, GO:0003849, GO:0009073, GO:0004421
Pa_1_6480	GO:0005525, GO:0005622, GO:0042493, GO:0005515, GO:0042254, GO:0005816, GO:0003723, GO:0015031, GO:0005730, GO:0003924, GO:0006364, GO:0051301, GO:0030687, GO:0005654, GO:0000055, GO:0040010
Pa_1_650	GO:0005634, GO:0008270, GO:0003700, GO:0009279
Pa_1_6500	GO:0005634, GO:0003700, GO:0051920, GO:0043565
Pa_1_6510	GO:0055114
Pa_1_6520	GO:0046872, GO:0008270, GO:0050662, GO:0016491, GO:0004222, GO:0006508, GO:0005759, GO:0005515, GO:0003824, GO:0005739, GO:0006629, GO:0006810, GO:0044237, GO:0005743, GO:0006627, GO:0022900, GO:0009060, GO:0070469, GO:0008121, GO:0022904, GO:0005750, GO:0019028, GO:0006119, GO:0017087, GO:0030729
Pa_1_6530	GO:0008270
Pa_1_6550	GO:0008270, GO:0005488, GO:0045324, GO:0015031, GO:0005624, GO:0033263, GO:0005795
Pa_1_6560	GO:0016740, GO:0008270, GO:0007126, GO:0016772, GO:0006506, GO:0005624, GO:0030176
Pa_1_6570	GO:0005829, GO:0005634, GO:0016829, GO:0019120, GO:0008721, GO:0070178
Pa_1_6580	GO:0016740, GO:0005737, GO:0005829, GO:0005634, GO:0005515, GO:0005524, GO:0051286, GO:0006281, GO:0031505, GO:0006355, GO:0006351, GO:0030702, GO:0034599, GO:0006284, GO:0009272, GO:0000790, GO:0006338, GO:0031134, GO:0005826, GO:0000142, GO:0000915, GO:0007163, GO:0001300, GO:0010570, GO:0006357, GO:0030479, GO:0006897, GO:0000916, GO:0016586, GO:0045944, GO:0000122, GO:0006887, GO:0005628, GO:…
Pa_1_6590	GO:0006367, GO:0003743, GO:0008270, GO:0005515, GO:0008168, GO:0003676, GO:0016301, GO:0006355, GO:0005669, GO:0000991, GO:0003682, GO:0051123, GO:0009452, GO:0001510, GO:0017025, GO:0004402, GO:0032947
Pa_1_6600	GO:0005737, GO:0005634, GO:0003700, GO:0042493, GO:0031505, GO:0007165, GO:0043565, GO:0006357, GO:0001101, GO:0045944, GO:0008301, GO:0047484, GO:0051019
Pa_1_6620	GO:0005634, GO:0006511, GO:0004298, GO:0016706, GO:0019773
Pa_1_6640	GO:0016787, GO:0009986, GO:0005576, GO:0005524, GO:0004553, GO:0005975, GO:0005618, GO:0007047, GO:0016020, GO:0043169, GO:0005783, GO:0030246, GO:0004672, GO:0009313, GO:0004339, GO:0044275, GO:0008422, GO:0044247, GO:0046379, GO:0000272, GO:0009251, GO:0032450, GO:0004575, GO:0033919, GO:0051278, GO:0031160, GO:0004558
Pa_1_6650	GO:0005634, GO:0008270, GO:0016021, GO:0022891, GO:0008643, GO:0003700, GO:0005886, GO:0003676, GO:0004872, GO:0009405, GO:0007165, GO:0030448, GO:0009749, GO:0005353, GO:0005355, GO:0015578, GO:0008646, GO:0005536, GO:0051594, GO:0015755, GO:0015758, GO:0015761, GO:0045835, GO:0019660
Pa_1_6660	GO:0003677
Pa_1_6670	GO:0006914
Pa_1_6680	GO:0005622, GO:0008270
Pa_1_6690	GO:0016740, GO:0046872, GO:0005829, GO:0005634, GO:0005622, GO:0008270, GO:0006508, GO:0005515, GO:0003824, GO:0006995, GO:0006888, GO:0007163, GO:0070317, GO:0005968, GO:0018344, GO:0006612, GO:0016767, GO:0004198, GO:0004663, GO:0004660, GO:0018343, GO:0010958, GO:0005965, GO:0005953, GO:0004662, GO:0034411
Pa_1_6700	GO:0005622, GO:0007165, GO:0005096, GO:0035091
Pa_1_6710	GO:0005634, GO:0005840, GO:0042493, GO:0042254, GO:0005730, GO:0006364, GO:0000447, GO:0030687, GO:0005654, GO:0000055, GO:0042273
Pa_1_6720	GO:0005840
Pa_1_6730	GO:0005737, GO:0046872, GO:0005634, GO:0003677, GO:0005515, GO:0005524, GO:0009055, GO:0017111, GO:0016887, GO:0006268, GO:0004386, GO:0030466, GO:0003682, GO:0051301, GO:0006271, GO:0006348, GO:0006357, GO:0003697, GO:0009378, GO:0031390, GO:0006270, GO:0003688, GO:0007090, GO:0000084, GO:0031939, GO:0003712, GO:0031261, GO:0005656, GO:0006267, GO:0030174, GO:0000727, GO:0042555, GO:0031298, GO:…
Pa_1_6740	GO:0005829, GO:0005634, GO:0042493, GO:0005625, GO:0005515, GO:0005524, GO:0005783, GO:0033554, GO:0015031, GO:0005730, GO:0016236, GO:0005777, GO:0017111, GO:0016887, GO:0004386, GO:0030433, GO:0005792, GO:0000790, GO:0031134, GO:0051301, GO:0005624, GO:0030687, GO:0007049, GO:0034727, GO:0006906, GO:0043332, GO:0000055, GO:0042273, GO:0046982, GO:0007031, GO:0034098, GO:0000837, GO:0071629, GO:…
Pa_1_675	GO:0005829, GO:0003676, GO:0003723, GO:0030529, GO:0005681, GO:0046540, GO:0005685, GO:0000395
Pa_1_6750	GO:0005737, GO:0005829, GO:0005634, GO:0055085, GO:0016020
Pa_1_6760	GO:0005737, GO:0005829, GO:0005634, GO:0003677, GO:0008270, GO:0016491, GO:0006096, GO:0005524, GO:0006281, GO:0005739, GO:0016301, GO:0030437, GO:0006355, GO:0001302, GO:0016773, GO:0006013, GO:0009051, GO:0045944, GO:0008361, GO:0004396, GO:0004340, GO:0008865, GO:0019158, GO:0006002, GO:0032445, GO:0006000, GO:0046015
Pa_1_6770	GO:0005737, GO:0005829, GO:0005634, GO:0003824, GO:0030170, GO:0016829, GO:0006520, GO:0004121, GO:0019346, GO:0009086, GO:0003962, GO:0006534, GO:0019281
Pa_1_6780	GO:0003677, GO:0016021, GO:0005524, GO:0032153, GO:0005783, GO:0006914, GO:0006810, GO:0030288, GO:0000329, GO:0015035, GO:0007264, GO:0003729, GO:0007049, GO:0042144, GO:0007163, GO:0008104, GO:0005083, GO:0006270, GO:0007034, GO:0006797, GO:0031310, GO:0033254, GO:0008976, GO:0016237
Pa_1_6790	GO:0005737, GO:0005829, GO:0005634, GO:0008168, GO:0042254, GO:0030731, GO:0019702, GO:0016274
Pa_1_6810	GO:0005488
Pa_1_6820	GO:0016740, GO:0005737, GO:0016020, GO:0016301, GO:0030246, GO:0006914, GO:0015031, GO:0000228, GO:0016126, GO:0016758, GO:0016774, GO:0032120, GO:0016906, GO:0030259
Pa_1_6830	GO:0050660, GO:0008762, GO:0016021, GO:0005488, GO:0005886, GO:0055085, GO:0004872, GO:0005509, GO:0006810, GO:0005743, GO:0006839, GO:0031305, GO:0005315, GO:0015114
Pa_1_6840	GO:0005634, GO:0003824, GO:0006352
Pa_1_6850	GO:0005488, GO:0007049, GO:0016538
Pa_1_6860	GO:0050662, GO:0005488, GO:0003824, GO:0044237
Pa_1_6870	GO:0005737, GO:0005829, GO:0005634, GO:0003677, GO:0005524, GO:0032153, GO:0051286, GO:0030447, GO:0003779, GO:0004386, GO:0030479, GO:0005934, GO:0043332, GO:0034613, GO:0030036, GO:0000916, GO:0051015, GO:0005884, GO:0008290, GO:0051693, GO:0051016
Pa_1_6880	GO:0016740, GO:0005634, GO:0016021, GO:0030131, GO:0006886, GO:0016192, GO:0016757, GO:0031227, GO:0006506, GO:0000009, GO:0006488, GO:0004584
Pa_1_6890	GO:0016042, GO:0003847
Pa_1_690	GO:0005737, GO:0005829, GO:0005634, GO:0006508, GO:0005509, GO:0033554, GO:0004197, GO:0006915, GO:0051603, GO:0070301, GO:0005544, GO:0006515, GO:0042221
Pa_1_6910	GO:0016021, GO:0005488, GO:0055085, GO:0006810, GO:0005743, GO:0005384, GO:0016530, GO:0006828
Pa_1_6920	GO:0005737, GO:0046872, GO:0005829, GO:0005634, GO:0005622, GO:0008270, GO:0048037, GO:0005515, GO:0000226, GO:0005816, GO:0005783, GO:0005730, GO:0030437, GO:0007126, GO:0006364, GO:0009408, GO:0006397, GO:0006417, GO:0000778, GO:0007094, GO:0034501, GO:0051301, GO:0007067, GO:0005977, GO:0005935, GO:0004722, GO:0006470, GO:0004721, GO:0005847, GO:0030847, GO:0030846, GO:0034613, GO:0006883, GO:…
Pa_1_6930	GO:0005198, GO:0005923
Pa_1_6940	GO:0005634, GO:0018024
Pa_1_6950	GO:0005634, GO:0005622, GO:0005488, GO:0003676, GO:0003723, GO:0006396, GO:0030529, GO:0004386, GO:0006397, GO:0000243, GO:0005685, GO:0000395, GO:0071004, GO:0000398
Pa_1_6960	GO:0005759, GO:0005576, GO:0020037, GO:0005739, GO:0004601, GO:0005758, GO:0006979, GO:0042744, GO:0004130, GO:0004096
Pa_1_6970	GO:0005634, GO:0008270, GO:0003700, GO:0003676, GO:0003723, GO:0000166, GO:0005507, GO:0006379, GO:0008131, GO:0048038, GO:0009308, GO:0006378, GO:0005849
Pa_1_6980	GO:0005622, GO:0008270, GO:0016021, GO:0005886, GO:0005515, GO:0008168, GO:0016020, GO:0006457, GO:0001302, GO:0005743, GO:0005624, GO:0045861, GO:0000001, GO:0007007, GO:0070584
Pa_1_6990	GO:0005829, GO:0005634, GO:0005840, GO:0008233, GO:0007346, GO:0019005, GO:0031386, GO:0051443, GO:0045116
Pa_1_70	GO:0004091, GO:0005576, GO:0009405, GO:0044275, GO:0050525
Pa_1_700	GO:0004871
Pa_1_7000	GO:0005634, GO:0016021, GO:0006355
Pa_1_7020	GO:0005874, GO:0051082, GO:0007021
Pa_1_7030	GO:0046872, GO:0016021, GO:0005524, GO:0031505, GO:0005509, GO:0006812, GO:0030448, GO:0000139, GO:0006486, GO:0009612, GO:0006874, GO:0015662, GO:0006754, GO:0005388, GO:0015410, GO:0008554
Pa_1_7040	GO:0005737, GO:0005829, GO:0005634, GO:0005515, GO:0005789, GO:0005839, GO:0004298, GO:0051603, GO:0000502, GO:0019774, GO:0034515, GO:0043161, GO:0010499, GO:0061133
Pa_1_7090	GO:0004091, GO:0004806, GO:0016042, GO:0006629
Pa_1_710	GO:0005634, GO:0050660, GO:0008762, GO:0008270, GO:0016021, GO:0003700, GO:0055085
Pa_1_7100	GO:0005737, GO:0005829, GO:0005634, GO:0004864, GO:0001950, GO:0009986, GO:0005886, GO:0030445, GO:0032153, GO:0051286, GO:0005816, GO:0030447, GO:0006281, GO:0009405, GO:0030437, GO:0007346, GO:0005977, GO:0007265, GO:0007124, GO:0034613, GO:0001410, GO:0000122, GO:0006109, GO:0034221, GO:0046982, GO:0006270, GO:0000077, GO:0003688, GO:0051233, GO:0019904, GO:0006267, GO:0007095, GO:0001402, GO:…
Pa_1_7110	GO:0005739, GO:0006461
Pa_1_7130	GO:0005737, GO:0016787, GO:0005634, GO:0009116, GO:0008270, GO:0003700, GO:0006508, GO:0005524, GO:0003824, GO:0004497, GO:0009055, GO:0020037, GO:0016705, GO:0005975, GO:0043169, GO:0003723, GO:0016301, GO:0030246, GO:0004190, GO:0003964, GO:0006278, GO:0004674, GO:0006629, GO:0004565, GO:0009341, GO:0016812, GO:0006208
Pa_1_7140	GO:0005634, GO:0003677, GO:0008270, GO:0016021, GO:0008643, GO:0008168, GO:0003676, GO:0055085, GO:0016788, GO:0005215, GO:0006351, GO:0016620, GO:0006397
Pa_1_7150	GO:0005634, GO:0003677, GO:0005622, GO:0008270, GO:0016021, GO:0003700, GO:0016491, GO:0003676, GO:0055085, GO:0006351
Pa_1_7170	GO:0016021, GO:0009986, GO:0005886, GO:0051286, GO:0030447, GO:0009277, GO:0015171, GO:0000139, GO:0005887, GO:0000328, GO:0030134, GO:0006808, GO:0015203, GO:0015193, GO:0019676, GO:0006828, GO:0005771, GO:0005291
Pa_1_7180	GO:0016787, GO:0009116, GO:0016021, GO:0005625, GO:0030131, GO:0006886, GO:0016192, GO:0005975, GO:0016020, GO:0030145, GO:0000287, GO:0005509, GO:0004571, GO:0005783, GO:0005789, GO:0004588, GO:0006221, GO:0004559, GO:0044431, GO:0060205, GO:0030448, GO:0030433, GO:0005624, GO:0006487, GO:0006491, GO:0009612, GO:0051278
Pa_1_720	GO:0005634, GO:0003677, GO:0008270, GO:0003700, GO:0020037, GO:0019825, GO:0016702, GO:0015671, GO:0018580
Pa_1_7200	GO:0003676, GO:0000166, GO:0030529
Pa_1_7210	GO:0005829, GO:0004806, GO:0032153, GO:0051286, GO:0030447, GO:0043130, GO:0006629, GO:0003779, GO:0030479, GO:0006897, GO:0000147, GO:0045010, GO:0033205, GO:0000001, GO:0005856, GO:0030833, GO:0005885, GO:0034314
Pa_1_7220	GO:0005737, GO:0046872, GO:0005829, GO:0005634, GO:0042493, GO:0005515, GO:0005524, GO:0032153, GO:0051286, GO:0005816, GO:0030447, GO:0016301, GO:0004674, GO:0007126, GO:0035556, GO:0004672, GO:0005819, GO:0006261, GO:0000228, GO:0000778, GO:0007094, GO:0034501, GO:0031134, GO:0051301, GO:0007067, GO:0070683, GO:0000915, GO:0007049, GO:0000910, GO:0051519, GO:0005935, GO:0010696, GO:0008608, GO:…
Pa_1_7243	GO:0005488
Pa_1_7245	GO:0005488
Pa_1_7250	GO:0006281, GO:0016799
Pa_1_7270	GO:0005622, GO:0005089, GO:0035023, GO:0035556
Pa_1_7280	GO:0000502
Pa_1_7290	GO:0005737, GO:0005525, GO:0005829, GO:0005634, GO:0005886, GO:0005515, GO:0006886, GO:0015031, GO:0005789, GO:0003924, GO:0007346, GO:0000139, GO:0007264, GO:0006888, GO:0000467, GO:0051276, GO:0070317, GO:0006997, GO:0031938, GO:0006913, GO:0031291
Pa_1_730	GO:0016787
Pa_1_7300	GO:0003677, GO:0008270, GO:0016021, GO:0005524, GO:0003824, GO:0020037, GO:0005975, GO:0008061, GO:0043169, GO:0005529, GO:0004872, GO:0016798, GO:0004601, GO:0004386, GO:0004338, GO:0006979, GO:0050832, GO:0031640
Pa_1_7308	GO:0003700, GO:0043565
Pa_1_7310	GO:0005829, GO:0003743, GO:0005488, GO:0005730, GO:0006355, GO:0042790, GO:0000120, GO:0001169
Pa_1_7320	GO:0016740, GO:0005634, GO:0005622, GO:0003700, GO:0042493, GO:0006508, GO:0005515, GO:0005524, GO:0006355, GO:0004252, GO:0006351, GO:0008026, GO:0043565, GO:0006357, GO:0071280, GO:0006109, GO:0016602, GO:0000436, GO:0043457, GO:0000978, GO:0003972, GO:0006388, GO:0006543, GO:0042823
Pa_1_7330	GO:0006457, GO:0051082, GO:0016272, GO:0007021
Pa_1_7350	GO:0016021, GO:0005524, GO:0016020, GO:0016301, GO:0000155, GO:0018106, GO:0004872, GO:0006355, GO:0000156, GO:0004871
Pa_1_7360	GO:0005737, GO:0005634, GO:0050660, GO:0010181, GO:0008033, GO:0006400, GO:0017150
Pa_1_7370	GO:0005829, GO:0005634, GO:0005840, GO:0004091, GO:0005625, GO:0006464, GO:0051722
Pa_1_7380	GO:0016021, GO:0005515, GO:0030447, GO:0031505, GO:0005739, GO:0004872, GO:0000324, GO:0006457, GO:0005783, GO:0006810, GO:0005789, GO:0009272, GO:0030173, GO:0005935, GO:0005887, GO:0090002, GO:0005262, GO:0032995, GO:0006874, GO:0017157, GO:0031520, GO:0033157, GO:0015230, GO:0031410, GO:0015886, GO:0070509, GO:0071433
Pa_1_7390	GO:0005634, GO:0003677
Pa_1_740	GO:0046872, GO:0016021, GO:0005886, GO:0005515, GO:0055085, GO:0015031, GO:0005743, GO:0009408, GO:0004721, GO:0016791, GO:0009651, GO:0005744, GO:0030150, GO:0030943
Pa_1_7410	GO:0005737, GO:0005829, GO:0005634, GO:0004806, GO:0005515, GO:0006281, GO:0006629, GO:0051301, GO:0007067, GO:0007076, GO:0030261, GO:0000796, GO:0000799, GO:0070058
Pa_1_7420	GO:0016021, GO:0055085, GO:0005789, GO:0008324, GO:0000502, GO:0006811, GO:0030234, GO:0042176
Pa_1_7430	GO:0005737, GO:0005829, GO:0005634, GO:0005625, GO:0006457, GO:0031072, GO:0051082, GO:0045047, GO:0006888, GO:0006998, GO:0004615, GO:0019307
Pa_1_7440	GO:0005488, GO:0005886, GO:0005741
Pa_1_7450	GO:0016021, GO:0022857, GO:0055085, GO:0005739, GO:0000324, GO:0006810, GO:0005774
Pa_1_7460	GO:0005737, GO:0016787, GO:0005829, GO:0005634, GO:0003677, GO:0008270, GO:0005515, GO:0030447, GO:0009405, GO:0006355, GO:0006351, GO:0030702, GO:0001302, GO:0000070, GO:0030466, GO:0045128, GO:0006338, GO:0070211, GO:0006348, GO:0006357, GO:0006368, GO:0045944, GO:0060303, GO:0003714, GO:0000122, GO:0004407, GO:0048869, GO:0034503, GO:0060258, GO:0031939, GO:0046969, GO:0046970, GO:0051570, GO:…
Pa_1_7470	GO:0008270
Pa_1_7480	GO:0005737, GO:0046872, GO:0005829, GO:0005634, GO:0001950, GO:0009986, GO:0030445, GO:0005515, GO:0016779, GO:0033554, GO:0005992, GO:0016539, GO:0006486, GO:0005978, GO:0006011, GO:0003983, GO:0006078
Pa_1_7490	GO:0016021, GO:0055085, GO:0050661, GO:0008299, GO:0004420, GO:0015936
Pa_1_7500	GO:0016301, GO:0004150, GO:0006760
Pa_1_7510	GO:0009116, GO:0005622, GO:0008270, GO:0003824, GO:0003676
Pa_1_7520	GO:0005576, GO:0016829, GO:0030248, GO:0004553, GO:0030245, GO:0016162, GO:0008810, GO:0005975, GO:0045493
Pa_1_7530	GO:0003677, GO:0005622, GO:0003735, GO:0006412, GO:0005576, GO:0030248, GO:0004553, GO:0005975, GO:0003723, GO:0008233, GO:0005509, GO:0005089, GO:0035023, GO:0035556, GO:0007165, GO:0015934, GO:0000128, GO:0030261
Pa_1_7540	GO:0005737, GO:0005634, GO:0003677, GO:0008270, GO:0005840, GO:0003735, GO:0006412, GO:0016021, GO:0003700, GO:0022857, GO:0016491, GO:0006351, GO:0006310, GO:0005819, GO:0010508, GO:0006302
Pa_1_7570	GO:0005737, GO:0005829, GO:0005634, GO:0005515, GO:0004853, GO:0006779, GO:0006783
Pa_1_7580	GO:0016747
Pa_1_760	GO:0016787, GO:0016021, GO:0005783, GO:0005789, GO:0006888
Pa_1_7610	GO:0005737, GO:0005622, GO:0008270, GO:0006508, GO:0020037, GO:0005089, GO:0035023, GO:0035556, GO:0008234, GO:0005344
Pa_1_7620	GO:0046872, GO:0005634, GO:0003677, GO:0005515, GO:0005524, GO:0003723, GO:0003964, GO:0006278, GO:0004674, GO:0000228, GO:0000781, GO:0005097, GO:0003721, GO:0000333, GO:0007004, GO:0016233
Pa_1_7640	GO:0005622, GO:0008270, GO:0003824, GO:0030170, GO:0008483, GO:0008168, GO:0030151, GO:0008152, GO:0016829, GO:0006777, GO:0009000
Pa_1_7650	GO:0005525, GO:0005634, GO:0003677, GO:0005886, GO:0005515, GO:0005524, GO:0006260, GO:0006952, GO:0017111, GO:0016887, GO:0003924, GO:0043596, GO:0003682, GO:0000790, GO:0051301, GO:0007067, GO:0005664, GO:0003689, GO:0006270, GO:0033314, GO:0003688, GO:0007090, GO:0000082, GO:0000808, GO:0031261, GO:0005656, GO:0006267, GO:0031938, GO:0030174
Pa_1_7660	GO:0005737, GO:0016491, GO:0006067, GO:0005759, GO:0045329, GO:0016620, GO:0004029, GO:0008886, GO:0004030, GO:0019483, GO:0006598, GO:0003842, GO:0033721, GO:0019413, GO:0042645, GO:0006090, GO:0006740, GO:0004491, GO:0018478
Pa_1_7670	GO:0005525, GO:0016021, GO:0005529, GO:0005509, GO:0006457, GO:0005783, GO:0005789, GO:0006915, GO:0051082, GO:0030433, GO:0034605, GO:0034975, GO:0030176, GO:0006515
Pa_1_7680	GO:0005737, GO:0046872, GO:0005829, GO:0005634, GO:0046570, GO:0071267, GO:0019509
Pa_1_7700	GO:0005488, GO:0016491, GO:0004090
Pa_1_7710	GO:0005829, GO:0005634, GO:0006260, GO:0006271, GO:0034613, GO:0006270, GO:0007059, GO:0031261, GO:0000811
Pa_1_7730	GO:0009405, GO:0030448, GO:0044409, GO:0071467
Pa_1_7750	GO:0005737, GO:0016787, GO:0005634, GO:0003677, GO:0008270, GO:0016021, GO:0003700, GO:0005488, GO:0016491, GO:0004497, GO:0055085, GO:0006629, GO:0035556, GO:0004629, GO:0018662, GO:0019439
Pa_1_7760	GO:0005488, GO:0016491, GO:0008709, GO:0004316
Pa_1_7770	GO:0016740, GO:0005737, GO:0008270, GO:0006508, GO:0005524, GO:0004177, GO:0016301, GO:0016798, GO:0016773, GO:0050225
Pa_1_7790	GO:0016021, GO:0008080, GO:0005515, GO:0003676, GO:0005730, GO:0006810, GO:0016798, GO:0030529, GO:0006364, GO:0032040, GO:0000480, GO:0000447, GO:0000472, GO:0034388
Pa_1_780	GO:0005576, GO:0030248, GO:0004553, GO:0005975
Pa_1_7800	GO:0005576, GO:0030248, GO:0004553, GO:0005975
Pa_1_7810	GO:0005524, GO:0006260, GO:0005663, GO:0003689
Pa_1_7820	GO:0005840
Pa_1_7830	GO:0005737, GO:0005829, GO:0005634, GO:0005625, GO:0030446, GO:0005739, GO:0000287, GO:0042803, GO:0006950, GO:0009060, GO:0004427, GO:0006796
Pa_1_7840	GO:0005737, GO:0005829, GO:0032153, GO:0051286, GO:0000287, GO:0004427, GO:0006796
Pa_1_7850	GO:0005737, GO:0005829, GO:0008270, GO:0005886, GO:0032153, GO:0051286, GO:0005768, GO:0015031, GO:0005802, GO:0007264, GO:0006888, GO:0046685, GO:0006891, GO:0005543, GO:0071276, GO:0008060, GO:0032312
Pa_1_7860	GO:0016787, GO:0005829, GO:0005634, GO:0005622, GO:0008270, GO:0042493, GO:0016491, GO:0005515, GO:0042710, GO:0005524, GO:0008168, GO:0004497, GO:0009055, GO:0020037, GO:0016705, GO:0032153, GO:0005975, GO:0005739, GO:0016301, GO:0000324, GO:0009405, GO:0004674, GO:0006995, GO:0007165, GO:0004672, GO:0031573, GO:0030448, GO:0001302, GO:0000075, GO:0007049, GO:0005935, GO:0001403, GO:0007124, GO:…
Pa_1_7870	GO:0005737, GO:0005829, GO:0005634, GO:0003743, GO:0071541, GO:0016282
Pa_1_7880	GO:0005737, GO:0046872, GO:0005634, GO:0006457, GO:0031072, GO:0051082, GO:0006950
Pa_1_7890	GO:0005737, GO:0005829, GO:0005634, GO:0004864, GO:0001950, GO:0009986, GO:0005886, GO:0030445, GO:0032153, GO:0051286, GO:0005816, GO:0030447, GO:0006281, GO:0009405, GO:0030437, GO:0007346, GO:0005977, GO:0007265, GO:0007124, GO:0034613, GO:0001410, GO:0000122, GO:0006109, GO:0034221, GO:0046982, GO:0006270, GO:0000077, GO:0003688, GO:0051233, GO:0019904, GO:0006267, GO:0007095, GO:0001402, GO:…
Pa_1_7895	GO:0005739, GO:0004857, GO:0045980
Pa_1_790	GO:0016884, GO:0016021, GO:0005488, GO:0003824, GO:0055085, GO:0015031, GO:0051537, GO:0015833
Pa_1_7900	GO:0005737, GO:0008270, GO:0005576, GO:0005515, GO:0003676, GO:0055085, GO:0030248, GO:0004553, GO:0005975, GO:0005618, GO:0007047, GO:0031225, GO:0043169, GO:0015031, GO:0005643, GO:0017056, GO:0046907, GO:0006810, GO:0008757, GO:0006950, GO:0051028, GO:0051301, GO:0000917, GO:0007049, GO:0000128, GO:0005543, GO:0007155, GO:0031965, GO:0016973, GO:0005199, GO:0006606, GO:0000055, GO:0000054, GO:…
Pa_1_7910	GO:0004553, GO:0042597
Pa_1_7930	GO:0005525, GO:0005829, GO:0003743, GO:0008270, GO:0005840, GO:0004222, GO:0006508, GO:0005515, GO:0003924, GO:0003746, GO:0043614, GO:0045903, GO:0005850
Pa_1_7950	GO:0005737, GO:0005829, GO:0005634, GO:0005524, GO:0016301, GO:0017111, GO:0006221, GO:0009041, GO:0006207, GO:0004017, GO:0009165, GO:0019205, GO:0006139, GO:0019201, GO:0016776, GO:0004127
Pa_1_7960	GO:0005840, GO:0031072
Pa_1_7970	GO:0005737, GO:0005829, GO:0005634, GO:0003743, GO:0008270, GO:0005524, GO:0003676, GO:0005816, GO:0005739, GO:0003723, GO:0005730, GO:0008026, GO:0000184, GO:0004004, GO:0006364, GO:0006397, GO:0005681, GO:0005682, GO:0045292, GO:0008380, GO:0000354
Pa_1_7980	GO:0008270, GO:0016021, GO:0005488, GO:0005886, GO:0055085, GO:0005509, GO:0006810, GO:0005215, GO:0005743, GO:0008565, GO:0006839, GO:0006526, GO:0004126, GO:0000064, GO:0000066
Pa_1_7990	GO:0016021, GO:0004872, GO:0033554, GO:0031966
Pa_1_80	GO:0016787, GO:0005829, GO:0005634, GO:0016757, GO:0016746
Pa_1_800	GO:0006508, GO:0005576, GO:0009405, GO:0004190, GO:0060359, GO:0009268
Pa_1_8000	GO:0005634, GO:0005622, GO:0008270, GO:0003676, GO:0000166
Pa_1_8010	GO:0005737, GO:0016787, GO:0005634, GO:0005524, GO:0006457, GO:0051082, GO:0005856, GO:0044267, GO:0007021, GO:0007010, GO:0005832
Pa_1_8020	GO:0005737, GO:0005829, GO:0005634, GO:0005515, GO:0005524, GO:0003723, GO:0008233, GO:0017111, GO:0016887, GO:0006289, GO:0030529, GO:0006511, GO:0005635, GO:0007346, GO:0006338, GO:0045899, GO:0032968, GO:0000502, GO:0034515, GO:0043161, GO:0030163, GO:0008540, GO:0004175, GO:0019904, GO:0070682, GO:0045732, GO:0043433, GO:0051091
Pa_1_8040	GO:0003676, GO:0003723, GO:0000166, GO:0045292, GO:0005686, GO:0000384
Pa_1_8050	GO:0016021, GO:0003755, GO:0006457, GO:0016853, GO:0000329
Pa_1_8060	GO:0046872, GO:0005634, GO:0008270, GO:0016491, GO:0005576, GO:0004497, GO:0030248, GO:0004553, GO:0005975, GO:0005529, GO:0016788, GO:0005507, GO:0052716, GO:0008471, GO:0042438, GO:0004503, GO:0004097
Pa_1_8070	GO:0046872, GO:0005829, GO:0005634, GO:0003677, GO:0016021, GO:0022891, GO:0005515, GO:0005739, GO:0005730, GO:0008299, GO:0042797, GO:0006366, GO:0016539, GO:0003899, GO:0006383, GO:0005666, GO:0005665, GO:0042790, GO:0005736, GO:0006360, GO:0032549
Pa_1_8090	GO:0005525, GO:0005622, GO:0042493, GO:0006886, GO:0016192, GO:0005794, GO:0015031, GO:0016874, GO:0003924, GO:0007264, GO:0006888, GO:0004871
Pa_1_8100	GO:0005840, GO:0003735, GO:0006412, GO:0042254, GO:0022627
Pa_1_8160	GO:0005737, GO:0016021, GO:0055085, GO:0035556, GO:0046695, GO:0004309, GO:0005319, GO:0001310, GO:0031930
Pa_1_8170	GO:0046872, GO:0016021, GO:0016491, GO:0022900, GO:0070469, GO:0005740, GO:0007585
Pa_1_8190	GO:0016021, GO:0005794, GO:0005789, GO:0000329, GO:0006506, GO:0030026
Pa_1_8200	GO:0008080
Pa_1_8210	GO:0016021, GO:0006886, GO:0015031, GO:0005789, GO:0000139, GO:0030173, GO:0006888, GO:0030134, GO:0030176
Pa_1_8220	GO:0016021, GO:0015171
Pa_1_8230	GO:0005488
Pa_1_8240	GO:0005737, GO:0005829, GO:0005634, GO:0005515, GO:0005789, GO:0005635, GO:0007346, GO:0005839, GO:0004298, GO:0051603, GO:0000502, GO:0019774, GO:0034515, GO:0043161, GO:0010499
Pa_1_8250	GO:0005829, GO:0003677, GO:0008270, GO:0005488, GO:0005515, GO:0003676, GO:0055085, GO:0005643, GO:0017056, GO:0046907, GO:0051301, GO:0031965, GO:0016973, GO:0000055, GO:0003899, GO:0006407, GO:0005198, GO:0031081, GO:0046983, GO:0000056, GO:0006611, GO:0055126, GO:0097064
Pa_1_8260	GO:0016021, GO:0016192, GO:0003723, GO:0006396, GO:0004872, GO:0005783, GO:0015031, GO:0005789, GO:0004525, GO:0006888, GO:0030176, GO:0006621, GO:0046923, GO:0045015
Pa_1_8270	GO:0005829, GO:0005634, GO:0050660, GO:0016491, GO:0005625, GO:0001950, GO:0030170, GO:0009055, GO:0020037, GO:0005739, GO:0006520, GO:0016627, GO:0016831, GO:0022900, GO:0006099, GO:0006106, GO:0000104, GO:0016156, GO:0071454
Pa_1_8290	GO:0005576, GO:0019236, GO:0000772
Pa_1_830	GO:0016021, GO:0022891, GO:0008643, GO:0016491, GO:0005886, GO:0019630
Pa_1_8300	GO:0005737, GO:0003677, GO:0016021, GO:0005524, GO:0005739, GO:0005643, GO:0006810, GO:0004386, GO:0004615, GO:0019307
Pa_1_8310	GO:0003677, GO:0008270, GO:0016021, GO:0008168, GO:0003723, GO:0005730, GO:0008757, GO:0006364, GO:0030687, GO:0015074, GO:0005338, GO:0008173, GO:0031167, GO:0016428
Pa_1_8320	GO:0005488, GO:0005515, GO:0006886, GO:0016192, GO:0030132, GO:0006355, GO:0007165, GO:0006897, GO:0005198, GO:0030130
Pa_1_8330	GO:0016884, GO:0005737, GO:0046872, GO:0016787, GO:0005829, GO:0003677, GO:0008270, GO:0016491, GO:0005515, GO:0005524, GO:0003824, GO:0016829, GO:0009405, GO:0003755, GO:0006457, GO:0006355, GO:0006807, GO:0006094, GO:0004437, GO:0004075, GO:0004485, GO:0004039, GO:0004847, GO:0071469, GO:0019740, GO:0043419, GO:0004736, GO:0045333, GO:0006090
Pa_1_8340	GO:0016021, GO:0005739, GO:0031966
Pa_1_8350	GO:0005829, GO:0003676, GO:0003723, GO:0030529, GO:0005681, GO:0046540, GO:0005685, GO:0000395
Pa_1_8360	GO:0005840, GO:0003735, GO:0006412, GO:0042254, GO:0022627, GO:0002181, GO:0022625, GO:0000027, GO:0019843
Pa_1_8380	GO:0005737, GO:0005829, GO:0016779, GO:0016301, GO:0033554
Pa_1_8390	GO:0005829, GO:0008270, GO:0005759, GO:0005625, GO:0009986, GO:0005886, GO:0005515, GO:0005524, GO:0003676, GO:0005794, GO:0006629, GO:0007035, GO:0005743, GO:0000329, GO:0046933, GO:0015991, GO:0015986, GO:0005624, GO:0006879, GO:0022904, GO:0042645, GO:0033180, GO:0046961, GO:0042777, GO:0008553, GO:0000221, GO:0005753, GO:0045261, GO:0042776, GO:0006874, GO:0043531, GO:0043499, GO:0042288, GO:…
Pa_1_840	GO:0046872, GO:0050660, GO:0005576, GO:0003824, GO:0030245, GO:0030246, GO:0016052, GO:0047735
Pa_1_8430	GO:0016021, GO:0006508, GO:0005576, GO:0030447, GO:0016020, GO:0004177, GO:0003723, GO:0009405, GO:0004252, GO:0008236, GO:0005774, GO:0000329, GO:0005802, GO:0019236, GO:0003899, GO:0008239, GO:0016485, GO:0007323
Pa_1_8470	GO:0016021, GO:0005488, GO:0005515, GO:0005783, GO:0000139, GO:0006888, GO:0030134
Pa_1_8480	GO:0016021, GO:0005886, GO:0055085, GO:0005215, GO:0000329, GO:0015450
Pa_1_850	GO:0016021, GO:0005886, GO:0016020, GO:0005789, GO:0046873, GO:0010508, GO:0005385, GO:0071276, GO:0033217, GO:0000007, GO:0006831, GO:0034224, GO:0006830, GO:0055069
Pa_1_8500	GO:0005829, GO:0005634, GO:0005840, GO:0006412, GO:0008168, GO:0009055, GO:0006810, GO:0045454, GO:0015035, GO:0006662, GO:0022900, GO:0000502, GO:0071448
Pa_1_8530	GO:0005634, GO:0003677, GO:0008270, GO:0003700, GO:0007165, GO:0006351, GO:0005096, GO:0035091, GO:0071229
Pa_1_8570	GO:0003677, GO:0016747, GO:0005622, GO:0003676, GO:0005730, GO:0006364, GO:0005654, GO:0000786, GO:0006334, GO:0010521, GO:0000494, GO:0032211
Pa_1_8580	GO:0005758, GO:0006825, GO:0016531
Pa_1_8590	GO:0005829, GO:0003677, GO:0005515, GO:0016301, GO:0009650, GO:0007049, GO:0031931, GO:0031932, GO:0031929, GO:0033314, GO:0007004, GO:0070209, GO:0001934, GO:0033261, GO:0043111
Pa_1_8600	GO:0005737, GO:0046872, GO:0005829, GO:0005634, GO:0005488, GO:0005515, GO:0005524, GO:0006464, GO:0016874, GO:0016925, GO:0007346, GO:0016881, GO:0004842, GO:0008641, GO:0045116, GO:0019781, GO:0031510, GO:0019948
Pa_1_8610	GO:0005829, GO:0003677, GO:0042797, GO:0003899, GO:0006383, GO:0070317, GO:0046983, GO:0005666, GO:0005736, GO:0006360
Pa_1_8620	GO:0046872, GO:0051287, GO:0016021, GO:0005886, GO:0005515, GO:0055085, GO:0009055, GO:0006810, GO:0005743, GO:0005624, GO:0022900, GO:0005747, GO:0008137, GO:0006120, GO:0070469, GO:0051539, GO:0048038, GO:0006979, GO:0003954, GO:0016651, GO:0019684, GO:0044238
Pa_1_8630	GO:0016020, GO:0005777
Pa_1_8640	GO:0050660, GO:0005743, GO:0006744, GO:0016709, GO:0046914
Pa_1_8660	GO:0005737, GO:0005829, GO:0005634, GO:0050660, GO:0008762, GO:0042493, GO:0005515, GO:0005524, GO:0032153, GO:0005816, GO:0030447, GO:0000131, GO:0031505, GO:0016301, GO:0033554, GO:0004674, GO:0007126, GO:0004672, GO:0000902, GO:0051301, GO:0007163, GO:0051519, GO:0030479, GO:0043332, GO:0034613, GO:0051666, GO:0051285, GO:0000920, GO:0005628, GO:0030476, GO:0005933, GO:0007118, GO:0030950, GO:…
Pa_1_8670	GO:0005737, GO:0005829, GO:0005634, GO:0003677, GO:0000723, GO:0008033, GO:0006417, GO:0000781, GO:0006450, GO:0043047, GO:0006400, GO:0070525
Pa_1_8680	GO:0005829, GO:0005634, GO:0005515, GO:0006886, GO:0015031, GO:0006810, GO:0030126, GO:0006890
Pa_1_8690	GO:0005737, GO:0046872, GO:0005634, GO:0003677, GO:0005515, GO:0005524, GO:0009055, GO:0017111, GO:0016887, GO:0006268, GO:0004386, GO:0051301, GO:0006271, GO:0003697, GO:0009378, GO:0031390, GO:0006270, GO:0003688, GO:0007090, GO:0000084, GO:0031261, GO:0005656, GO:0006267, GO:0000727, GO:0042555, GO:0031298
Pa_1_8700	GO:0001950, GO:0005515, GO:0005816, GO:0031321, GO:0033554, GO:0007126, GO:0009408, GO:0006626, GO:0005741, GO:0006469, GO:0006348, GO:0042393, GO:0006897, GO:0031965, GO:0008104, GO:0034605, GO:0005811, GO:0030476, GO:0045859, GO:0032126, GO:0004402, GO:0000123, GO:0004860, GO:0070941, GO:0070056, GO:0070057
Pa_1_8720	GO:0016021, GO:0005886, GO:0005783, GO:0042802, GO:0004579, GO:0008250, GO:0006487, GO:0006486, GO:0018279
Pa_1_8740	GO:0003677
Pa_1_8750	GO:0016021, GO:0071627, GO:0006914, GO:0015031, GO:0006995, GO:0005774, GO:0032974, GO:0034639
Pa_1_8770	GO:0003677, GO:0005622, GO:0008270, GO:0016491, GO:0003676, GO:0016874, GO:0051537
Pa_1_880	GO:0016616, GO:0005488, GO:0005759, GO:0030170, GO:0008483, GO:0006537, GO:0006562, GO:0004657
Pa_1_8800	GO:0016021, GO:0022891, GO:0008643, GO:0022857
Pa_1_8810	GO:0005737, GO:0005829, GO:0005634, GO:0016021, GO:0005515, GO:0005524, GO:0000287, GO:0016887, GO:0009411, GO:0008094, GO:0007131, GO:0006298, GO:0003684, GO:0030983, GO:0032137, GO:0000228, GO:0000404, GO:0043570, GO:0000710, GO:0032302, GO:0000406, GO:0000403, GO:0000735, GO:0003879, GO:0000105, GO:0032301, GO:0032135, GO:0000400, GO:0032138, GO:0006311, GO:0045128, GO:0006301, GO:0017176, GO:…
Pa_1_8820	GO:0016620
Pa_1_8840	GO:0016787, GO:0005829, GO:0005634, GO:0003677, GO:0008270, GO:0003700, GO:0005488, GO:0005576, GO:0005524, GO:0004553, GO:0030245, GO:0005975, GO:0044248, GO:0044275, GO:0008422, GO:0006541, GO:0006270, GO:0005727
Pa_1_8850	GO:0005737, GO:0046872, GO:0016787, GO:0016021, GO:0006281, GO:0005783, GO:0005789, GO:0048278, GO:0051301, GO:0007049, GO:0030036, GO:0006887, GO:0030026, GO:0016311
Pa_1_8860	GO:0005737, GO:0005634, GO:0005739, GO:0006284, GO:0004844
Pa_1_8870	GO:0005739, GO:0005935, GO:0005934, GO:0030010
Pa_1_8880	GO:0005576, GO:0016829, GO:0008061, GO:0043169, GO:0016998, GO:0004568, GO:0006032
Pa_1_890	GO:0005634, GO:0006355, GO:0006351, GO:0000781
Pa_1_8900	GO:0016787, GO:0005634, GO:0006355, GO:0005773, GO:0003909, GO:0051103
Pa_1_8910	GO:0005829, GO:0005634, GO:0003677, GO:0051287, GO:0016616, GO:0016021, GO:0005488, GO:0005515, GO:0055085, GO:0006342, GO:0006355, GO:0006351, GO:0042802, GO:0030702, GO:0006338, GO:0051301, GO:0007049, GO:0045944, GO:0003714, GO:0000122, GO:0016575, GO:0005721, GO:0031939, GO:0006303, GO:0030174, GO:0030261, GO:0003713, GO:0033698, GO:0070210, GO:0061188, GO:0061186, GO:0032221, GO:0051038, GO:…
Pa_1_8920	GO:0046872, GO:0003677, GO:0016491, GO:0009986, GO:0030445, GO:0005515, GO:0005524, GO:0006260, GO:0009055, GO:0006810, GO:0051537, GO:0051536, GO:0006310, GO:0005743, GO:0022900, GO:0051539, GO:0022904, GO:0006099, GO:0005749, GO:0000104, GO:0048039, GO:0006121, GO:0008177, GO:0051103, GO:0051538, GO:0006105, GO:0003910
Pa_1_8940	GO:0005488, GO:0016874
Pa_1_8950	GO:0005840, GO:0003735, GO:0006412, GO:0016021, GO:0015109
Pa_1_8960	GO:0005634, GO:0003677, GO:0008270, GO:0003700, GO:0006351
Pa_1_8970	GO:0005737, GO:0005829, GO:0005634, GO:0005515, GO:0006886, GO:0005741, GO:0034087
Pa_1_8980	GO:0005737, GO:0005525, GO:0046872, GO:0005829, GO:0005622, GO:0008270, GO:0005840, GO:0005515, GO:0005524, GO:0003676, GO:0042254, GO:0035556, GO:0030529, GO:0003924, GO:0004386, GO:0003746, GO:0005681, GO:0046540, GO:0005682, GO:0045292, GO:0019843, GO:0000388, GO:0000244, GO:0045901, GO:0004697, GO:0030623
Pa_1_8990	GO:0016740, GO:0005737, GO:0046872, GO:0005829, GO:0016747, GO:0005625, GO:0005515, GO:0005777, GO:0006696, GO:0003729, GO:0005782, GO:0006635, GO:0006631, GO:0003985, GO:0003988
Pa_1_90	GO:0008168, GO:0008171
Pa_1_900	GO:0005634, GO:0003677, GO:0008270, GO:0003700, GO:0006071, GO:0006629, GO:0006351, GO:0008889
Pa_1_9000	GO:0005829, GO:0005634, GO:0005488, GO:0042710
Pa_1_9010	GO:0016021, GO:0005488, GO:0005515, GO:0005789, GO:0016874, GO:0016567, GO:0030433, GO:0034099, GO:0000839, GO:0000838
Pa_1_9020	GO:0005829, GO:0005634, GO:0005488, GO:0030702, GO:0000070, GO:0048471, GO:0006348, GO:0031965, GO:0006606, GO:0000054, GO:0006407, GO:0006399, GO:0006913, GO:0006404, GO:0005098, GO:0051383, GO:0016072
Pa_1_9030	GO:0005829, GO:0003677, GO:0005622, GO:0008270, GO:0003676, GO:0031011
Pa_1_9040	GO:0046872, GO:0005829, GO:0005634, GO:0005506, GO:0016491, GO:0005515, GO:0009055, GO:0016020, GO:0051536, GO:0016226, GO:0008137, GO:0051539, GO:0008901, GO:0042773
Pa_1_9070	GO:0005737, GO:0046872, GO:0005829, GO:0005634, GO:0005622, GO:0005886, GO:0005515, GO:0005524, GO:0032153, GO:0051286, GO:0007047, GO:0016301, GO:0009405, GO:0004674, GO:0035556, GO:0030448, GO:0001302, GO:0005635, GO:0031137, GO:0007346, GO:0000329, GO:0008360, GO:0030428, GO:0031929, GO:0051519, GO:0005935, GO:0003746, GO:0006897, GO:0046777, GO:0050850, GO:0031142, GO:0001410, GO:0008361, GO:…
Pa_1_9080	GO:0016787, GO:0015986, GO:0006200, GO:0022904, GO:0005753, GO:0042776, GO:0000276, GO:0015078, GO:0006119, GO:0016887
Pa_1_9090	GO:0016747, GO:0016021, GO:0003824, GO:0009055, GO:0020037, GO:0030246, GO:0016052, GO:0047735, GO:0008017
Pa_1_910	GO:0050660, GO:0004497, GO:0005739, GO:0006457, GO:0031227, GO:0005789, GO:0050661, GO:0004499, GO:0005507
Pa_1_9100	GO:0005737, GO:0046872, GO:0005829, GO:0005634, GO:0005622, GO:0005840, GO:0005886, GO:0005515, GO:0005524, GO:0007047, GO:0016301, GO:0004674, GO:0035556, GO:0007165, GO:0005635, GO:0031137, GO:0007346, GO:0008360, GO:0031929, GO:0051519, GO:0004693, GO:0005935, GO:0006897, GO:0046777, GO:0031142, GO:0019933, GO:0004150, GO:0006760, GO:0070941, GO:0004697, GO:0090062, GO:0001320, GO:2000750, GO:…
Pa_1_9120	GO:0005525, GO:0005829, GO:0009116, GO:0005515, GO:0003824, GO:0003676, GO:0006886, GO:0016757, GO:0016020, GO:0016301, GO:0031227, GO:0016788, GO:0006505, GO:0006629, GO:0035556, GO:0030529, GO:0046540, GO:0045292, GO:0004629, GO:0008380, GO:0000398
Pa_1_9130	GO:0005829, GO:0005634, GO:0006396, GO:0019901, GO:0000079, GO:0016301, GO:0006355, GO:0051301, GO:0007049, GO:0070816, GO:0006370, GO:0016538, GO:0008024, GO:0034243
Pa_1_9140	GO:0050660, GO:0008033, GO:0017150
Pa_1_9160	GO:0005737, GO:0046872, GO:0005829, GO:0005524, GO:0003723, GO:0016874, GO:0006189, GO:0006144, GO:0004638
Pa_1_9200	GO:0005515, GO:0003676, GO:0003723, GO:0000166, GO:0003746, GO:0045292, GO:0005686
Pa_1_9220	GO:0005737, GO:0005634
Pa_1_9230	GO:0016740, GO:0016021, GO:0042493, GO:0005488, GO:0016491, GO:0005886, GO:0005515, GO:0016757, GO:0031505, GO:0005783, GO:0005789, GO:0000049, GO:0030435, GO:0000139, GO:0006487, GO:0005801, GO:0000917, GO:0040008, GO:0000136, GO:0000009, GO:0000032, GO:0000030, GO:0070317, GO:0000138, GO:0030182
Pa_1_9240	GO:0005829, GO:0005634, GO:0005524, GO:0005777, GO:0016881, GO:0004842, GO:0007031, GO:0000209, GO:0006513, GO:0016562, GO:0051865
Pa_1_9260	GO:0003700, GO:0005730, GO:0006364, GO:0043565
Pa_1_9280	GO:0005829, GO:0005634, GO:0050660, GO:0042493, GO:0009055, GO:0000166, GO:0016627, GO:0035091, GO:0007154, GO:0022900, GO:0031966, GO:0003899, GO:0006099
Pa_1_9290	GO:0050660, GO:0005488, GO:0016491, GO:0005625, GO:0005515, GO:0009055, GO:0020037, GO:0005739, GO:0006810, GO:0016627, GO:0003854, GO:0006694, GO:0005743, GO:0035091, GO:0007154, GO:0022900, GO:0022904, GO:0006099, GO:0005749, GO:0000104, GO:0006121, GO:0008177, GO:0006105, GO:0007399
Pa_1_930	GO:0008168, GO:0016301
Pa_1_9300	GO:0005829, GO:0005625, GO:0001950, GO:0005515, GO:0030437, GO:0006189, GO:0009060, GO:0006164, GO:0003937, GO:0004643, GO:0006188
Pa_1_9310	GO:0005634, GO:0016021, GO:0006260, GO:0003824, GO:0008233, GO:0007126, GO:0005789, GO:0005787, GO:0006465
Pa_1_9320	GO:0016787, GO:0016021, GO:0005488, GO:0004806, GO:0004771, GO:0016042, GO:0016491, GO:0005886, GO:0000324, GO:0006629, GO:0006696, GO:0000032, GO:0005811, GO:0016125, GO:0016298
Pa_1_9330	GO:0005737, GO:0005829, GO:0005634, GO:0005625, GO:0009986, GO:0005886, GO:0005515, GO:0005524, GO:0005783, GO:0033554, GO:0015031, GO:0016236, GO:0005777, GO:0017111, GO:0016887, GO:0001302, GO:0006950, GO:0004386, GO:0030433, GO:0005792, GO:0000790, GO:0031134, GO:0051301, GO:0005624, GO:0007049, GO:0034727, GO:0006906, GO:0043332, GO:0046982, GO:0007031, GO:0034098, GO:0000837, GO:0071629, GO:…
Pa_1_9340	GO:0005488, GO:0009055, GO:0045454, GO:0015035
Pa_1_9360	GO:0046872, GO:0005634, GO:0003677, GO:0008270, GO:0003700, GO:0016301, GO:0016874
Pa_1_9370	GO:0008270, GO:0016491, GO:0003824, GO:0004126
Pa_1_9380	GO:0005829, GO:0003677, GO:0005488, GO:0016491, GO:0008168, GO:0006351, GO:0000790, GO:0006338, GO:0045892, GO:0045893, GO:0034605, GO:0003714, GO:0006904, GO:0040020, GO:0033193, GO:0032454, GO:0034649, GO:0009300, GO:0033169, GO:0046592
Pa_1_9390	GO:0005829, GO:0005634, GO:0003677, GO:0016491, GO:0005515, GO:0005524, GO:0032889, GO:0006896, GO:0006623, GO:0045324, GO:0000329, GO:0006895, GO:0034727, GO:0042144, GO:0006897, GO:0006904, GO:0033263, GO:0030897, GO:0035542, GO:0051469
Pa_1_940	GO:0005622, GO:0007165
Pa_1_9400	GO:0005524, GO:0016881, GO:0004842
Pa_1_9410	GO:0005737, GO:0016787, GO:0005829, GO:0005634, GO:0016491, GO:0005524, GO:0016301, GO:0004674, GO:0007165, GO:0007346, GO:0005516, GO:0019722, GO:0051519, GO:0000077, GO:0004683, GO:0048478, GO:0005954
Pa_1_9430	GO:0005737, GO:0005829, GO:0005524, GO:0005739, GO:0004812, GO:0032543, GO:0004821, GO:0006427
Pa_1_9440	GO:0016021, GO:0005886, GO:0005524, GO:0042626, GO:0008559
Pa_1_9450	GO:0005759, GO:0005743, GO:0046933, GO:0015986, GO:0022904, GO:0046961, GO:0005753, GO:0045261, GO:0042776, GO:0006119, GO:0000275, GO:0005756
Pa_1_9460	GO:0005524, GO:0009405, GO:0005730, GO:0030448, GO:0016853, GO:0000790, GO:0006271, GO:0006357, GO:0006368, GO:0005654, GO:0007076, GO:0000183, GO:0032440, GO:0005694, GO:0006333, GO:0003918, GO:0006265, GO:0042790, GO:0000019, GO:0031298, GO:0003917, GO:0031490, GO:0007097
Pa_1_9470	GO:0016740, GO:0009986, GO:0005576, GO:0030446, GO:0005886, GO:0030445, GO:0016757, GO:0004553, GO:0005975, GO:0005618, GO:0007047, GO:0031225, GO:0016020, GO:0009277, GO:0000131, GO:0006037, GO:0031505, GO:0042972, GO:0008061, GO:0046658
Pa_1_9500	GO:0016740, GO:0005737, GO:0005829, GO:0005634, GO:0003824, GO:0030170, GO:0008483, GO:0009058, GO:0016769, GO:0047536, GO:0009042, GO:0008793, GO:0009072, GO:0004838
Pa_1_9520	GO:0016787, GO:0016021, GO:0004497, GO:0009055, GO:0020037, GO:0016705, GO:0016020, GO:0070330, GO:0005789, GO:0016712, GO:0047646, GO:0018685, GO:0019825, GO:0010430, GO:0048252
Pa_1_9530	GO:0016787, GO:0005576, GO:0004553, GO:0005975, GO:0043169, GO:0016301, GO:0009405, GO:0030287, GO:0004563, GO:0033925
Pa_1_9540	GO:0008270, GO:0003676, GO:0006779, GO:0004729
Pa_1_9550	GO:0005829, GO:0005634, GO:0005488, GO:0016491, GO:0005739, GO:0006779, GO:0006783, GO:0004729
Pa_1_9560	GO:0006357, GO:0016592, GO:0001104
Pa_1_9580	GO:0005737, GO:0005829, GO:0005625, GO:0033554, GO:0050661, GO:0009051, GO:0004345, GO:0006006, GO:0051156, GO:0006091, GO:0042542
Pa_1_9590	GO:0008270, GO:0005840, GO:0003735, GO:0006412, GO:0005730, GO:0002181, GO:0022625, GO:0019843
Pa_1_960	GO:0016740, GO:0016021, GO:0005886, GO:0005524, GO:0003824, GO:0055085, GO:0009055, GO:0020037, GO:0016705, GO:0006281, GO:0006629, GO:0005215, GO:0030870, GO:0004435, GO:0035556
Pa_1_9605	GO:0016021, GO:0005789, GO:0012507, GO:0033116
Pa_1_9610	GO:0005737, GO:0005829, GO:0005634, GO:0003677, GO:0008270, GO:0005515, GO:0005524, GO:0005739, GO:0009405, GO:0007126, GO:0006355, GO:0003779, GO:0042803, GO:0006351, GO:0016887, GO:0008094, GO:0007131, GO:0030448, GO:0004386, GO:0004003, GO:0030466, GO:0000991, GO:0003682, GO:0005819, GO:0006364, GO:0000228, GO:0000790, GO:0006338, GO:0006348, GO:0006368, GO:0030036, GO:0016586, GO:0043044, GO:…
Pa_1_9620	GO:0005525, GO:0016787, GO:0016021, GO:0005488, GO:0004806, GO:0004771, GO:0016042, GO:0008152, GO:0020037, GO:0006886, GO:0016192, GO:0005783, GO:0005794, GO:0006629, GO:0030435, GO:0004601, GO:0007114, GO:0005811, GO:0006979, GO:0006644, GO:0042171, GO:0019433, GO:0047499, GO:0006642, GO:0071618
Pa_1_9650	GO:0016787, GO:0016788, GO:0006629
Pa_1_9660	GO:0005634, GO:0042493, GO:0005488, GO:0005515, GO:0005730, GO:0006364, GO:0030687, GO:0005654, GO:0070545
Pa_1_9670	GO:0005634, GO:0008270, GO:0003700
[truncated: 5,610 more rows]
