# Supplementary material for: A Genome-Wide Longitudinal Transcriptome Analysis of the Aging Model Podospora anserine
Source: PLoS One. 2013 Dec 20;8(12):e83109. doi: 10.1371/journal.pone.0083109 (PMC3869774; doi:10.1371/journal.pone.0083109)
Supplement: Table S8 — GO enrichment analysis of the continuously up- and down-regulated P. anserina genes. (XLS) [file pone.0083109.s008.xls]

## Sheet: Legend
Supporting Table S7: GO enrichment analysis of the continuously up- and down- regulated P. anserina genes. The columns are the same as described for Table S5. The first column lists the GO identifiers, the second the p-value for enrichment, the third column the number of counted terms in relation to the absolute number of genes which were assigned to the corresponding term in the fourth column. T…

## Sheet: Biological process
GOBPID	Pvalue	Count	Size	Term	Direction
GO:0044237	9.34916e-05	573	4163	cellular metabolic process	down
GO:0009987	0.000134605	687	5165	cellular process	down
GO:0043248	0.000252205	10	23	proteasome assembly	down
GO:0000041	0.00194407	13	43	transition metal ion transport	down
GO:0043100	0.00205455	3	3	pyrimidine nucleobase salvage	down
GO:0006223	0.00205455	3	3	uracil salvage	down
GO:0002109	0.00205455	3	3	maturation of SSU-rRNA from tricistronic rRNA transcript (SSU-rRNA, LSU-rRNA,5S)	down
GO:0002181	0.00239888	25	110	cytoplasmic translation	down
GO:0044270	0.00398439	25	114	cellular nitrogen compound catabolic process	down
GO:0000028	0.00469829	7	18	ribosomal small subunit assembly	down
GO:0045047	0.00490926	11	37	protein targeting to ER	down
GO:0072599	0.00490926	11	37	establishment of protein localization to endoplasmic reticulum	down
GO:0065003	0.00537674	71	418	macromolecular complex assembly	down
GO:0043161	0.00539013	29	141	proteasomal ubiquitin-dependent protein catabolic process	down
GO:0010498	0.00539013	29	141	proteasomal protein catabolic process	down
GO:0044267	0.0059469	210	1427	cellular protein metabolic process	down
GO:0019860	0.00743645	3	4	uracil metabolic process	down
GO:0006461	0.00789772	43	235	protein complex assembly	down
GO:0070972	0.0087316	12	45	protein localization to endoplasmic reticulum	down
GO:0030001	0.00915344	19	85	metal ion transport	down
GO:0009966	2.95399e-05	21	165	regulation of signal transduction	up
GO:0048583	3.15792e-05	25	218	regulation of response to stimulus	up
GO:0023051	3.88343e-05	21	168	regulation of signaling	up
GO:0006996	4.30748e-05	82	1156	organelle organization	up
GO:0042493	5.58813e-05	34	355	response to drug	up
GO:0016236	0.000352211	9	48	macroautophagy	up
GO:0080090	0.000412371	68	975	regulation of primary metabolic process	up
GO:0016192	0.000439818	38	459	vesicle-mediated transport	up
GO:0016043	0.000468819	102	1618	cellular component organization	up
GO:0051301	0.000484203	37	445	cell division	up
GO:0030447	0.000551231	37	448	filamentous growth	up
GO:0023052	0.000579759	45	582	signaling	up
GO:0007154	0.000592371	53	720	cell communication	up
GO:0050794	0.000594886	102	1628	regulation of cellular process	up
GO:0042221	0.000672925	51	689	response to chemical stimulus	up
GO:0031667	0.000765358	19	179	response to nutrient levels	up
GO:0040007	0.000848214	40	508	growth	up
GO:0009991	0.000877143	19	181	response to extracellular stimulus	up
GO:0019344	0.00089825	5	17	cysteine biosynthetic process	up
GO:0007165	0.000899826	44	577	signal transduction	up
GO:0007047	0.000931342	25	270	cellular cell wall organization	up
GO:0010035	0.000969858	16	141	response to inorganic substance	up
GO:0019219	0.00102783	56	790	regulation of nucleobase-containing compound metabolic process	up
GO:0045229	0.00115121	25	274	external encapsulating structure organization	up
GO:0071555	0.00121274	25	275	cell wall organization	up
GO:0071842	0.00125969	88	1390	cellular component organization at cellular level	up
GO:0035556	0.00132853	34	420	intracellular signal transduction	up
GO:0051171	0.00134874	56	799	regulation of nitrogen compound metabolic process	up
GO:0050789	0.00143061	104	1706	regulation of biological process	up
GO:0007010	0.00147789	27	310	cytoskeleton organization	up
GO:0019222	0.00160488	69	1042	regulation of metabolic process	up
GO:0031669	0.00161084	18	176	cellular response to nutrient levels	up
GO:0071841	0.00167256	105	1733	cellular component organization or biogenesis at cellular level	up
GO:0042147	0.00168625	6	28	retrograde transport, endosome to Golgi	up
GO:0031668	0.00183069	18	178	cellular response to extracellular stimulus	up
GO:0071496	0.00183069	18	178	cellular response to external stimulus	up
GO:0034645	0.00189705	105	1739	cellular macromolecule biosynthetic process	up
GO:0000910	0.0019206	22	238	cytokinesis	up
GO:0010646	0.00194653	10	72	regulation of cell communication	up
GO:0031323	0.00205117	66	996	regulation of cellular metabolic process	up
GO:0065007	0.00215432	113	1904	biological regulation	up
GO:0090338	0.00224601	2	2	positive regulation of formin-nucleated actin cable assembly	up
GO:0006914	0.00225585	14	125	autophagy	up
GO:0009605	0.00239175	19	197	response to external stimulus	up
GO:0009058	0.00260733	146	2587	biosynthetic process	up
GO:0009059	0.00263345	105	1755	macromolecule biosynthetic process	up
GO:0046578	0.00265478	10	75	regulation of Ras protein signal transduction	up
GO:0022402	0.00273172	49	698	cell cycle process	up
GO:0044249	0.00275827	139	2445	cellular biosynthetic process	up
GO:0060255	0.00277831	62	934	regulation of macromolecule metabolic process	up
GO:0006351	0.00292492	62	936	transcription, DNA-dependent	up
GO:0051252	0.00299751	50	719	regulation of RNA metabolic process	up
GO:0071840	0.0032501	113	1925	cellular component organization or biogenesis	up
GO:0007034	0.00362455	16	160	vacuolar transport	up
GO:2001141	0.00386577	49	710	regulation of RNA biosynthetic process	up
GO:0006355	0.00386577	49	710	regulation of transcription, DNA-dependent	up
GO:0032774	0.00395538	62	948	RNA biosynthetic process	up
GO:0016044	0.00402065	21	237	cellular membrane organization	up
GO:0061024	0.00402065	21	237	membrane organization	up
GO:0048522	0.00403986	28	349	positive regulation of cellular process	up
GO:0032878	0.00425852	7	44	regulation of establishment or maintenance of cell polarity	up
GO:0031505	0.00439568	19	208	fungal-type cell wall organization	up
GO:0045324	0.00454869	8	56	late endosome to vacuole transport	up
GO:0006534	0.00469576	5	24	cysteine metabolic process	up
GO:0010468	0.0050837	55	829	regulation of gene expression	up
GO:0009267	0.00509912	15	151	cellular response to starvation	up
GO:0031023	0.00564626	5	25	microtubule organizing center organization	up
GO:0051300	0.00564626	5	25	spindle pole body organization	up
GO:0051716	0.00566233	89	1479	cellular response to stimulus	up
GO:0042594	0.00576067	15	153	response to starvation	up
GO:0016197	0.00592801	11	97	endosomal transport	up
GO:0007155	0.00602276	9	71	cell adhesion	up
GO:0070887	0.00610764	27	343	cellular response to chemical stimulus	up
GO:0000003	0.00630352	43	620	reproduction	up
GO:0032233	0.00652623	2	3	positive regulation of actin filament bundle assembly	up
GO:0016479	0.00652623	2	3	negative regulation of transcription from RNA polymerase I promoter	up
GO:0090337	0.00652623	2	3	regulation of formin-nucleated actin cable assembly	up
GO:0030448	0.00686733	17	186	hyphal growth	up
GO:2000112	0.00702807	55	842	regulation of cellular macromolecule biosynthetic process	up
GO:0006623	0.00717331	10	86	protein targeting to vacuole	up
GO:0072665	0.00717331	10	86	protein localization to vacuole	up
GO:0072666	0.00717331	10	86	establishment of protein localization to vacuole	up
GO:0043405	0.00718178	3	9	regulation of MAP kinase activity	up
GO:0010556	0.00720094	55	843	regulation of macromolecule biosynthetic process	up
GO:0031326	0.00764621	56	864	regulation of cellular biosynthetic process	up
GO:0007265	0.00801368	11	101	Ras protein signal transduction	up
GO:0009889	0.0080177	56	866	regulation of biosynthetic process	up
GO:0009405	0.00805622	22	268	pathogenesis	up
GO:0007049	0.00851552	55	850	cell cycle	up
GO:0007264	0.0088864	17	191	small GTPase mediated signal transduction	up
GO:0033205	0.00905192	16	176	cell cycle cytokinesis	up
GO:0070882	0.00913252	26	337	cellular cell wall organization or biogenesis	up
GO:0071852	0.00913654	22	271	fungal-type cell wall organization or biogenesis	up
GO:0043328	0.00929925	5	28	protein targeting to vacuole involved in ubiquitin-dependent protein catabolic process via the multivesicular body sorting pathway	up
GO:0071310	0.00950111	13	132	cellular response to organic substance	up
GO:0048518	0.00953768	30	406	positive regulation of biological process	up

## Sheet: Molecular function
GOMFID	Pvalue	Count	Size	Term	Direction
GO:0003735	9.48912e-06	55	250	structural constituent of ribosome	down
GO:0031386	0.000230512	4	4	protein tag	down
GO:0016859	0.00112405	12	37	cis-trans isomerase activity	down
GO:0003755	0.00112405	12	37	peptidyl-prolyl cis-trans isomerase activity	down
GO:0060590	0.0017735	7	16	ATPase regulator activity	down
GO:0004845	0.00187352	3	3	uracil phosphoribosyltransferase activity	down
GO:0005198	0.00223763	65	374	structural molecule activity	down
GO:0043008	0.00680255	3	4	ATP-dependent protein binding	down
GO:0001671	0.00688733	5	11	ATPase activator activity	down
GO:0005515	3.06411e-05	104	1667	protein binding	up
GO:0004697	0.00395374	3	8	protein kinase C activity	up
GO:0005488	0.00620332	273	5839	binding	up
GO:0004683	0.00678286	4	18	calmodulin-dependent protein kinase activity	up

## Sheet: Cellular component
GOCCID	Pvalue	Count	Size	Term	Direction
GO:0044445	1.43942e-07	51	189	cytosolic part	down
GO:0044444	2.17989e-07	512	3437	cytoplasmic part	down
GO:0005737	2.31366e-06	552	3805	cytoplasm	down
GO:0005829	3.26119e-06	281	1738	cytosol	down
GO:0022626	4.40875e-06	29	94	cytosolic ribosome	down
GO:0044391	7.50828e-06	37	137	ribosomal subunit	down
GO:0005840	1.50147e-05	76	367	ribosome	down
GO:0022627	5.60222e-05	15	39	cytosolic small ribosomal subunit	down
GO:0015934	0.000318777	23	84	large ribosomal subunit	down
GO:0030529	0.000373618	113	647	ribonucleoprotein complex	down
GO:0044424	0.000720776	651	4749	intracellular part	down
GO:0015935	0.000815557	17	58	small ribosomal subunit	down
GO:0031597	0.000989874	10	26	cytosolic proteasome complex	down
GO:0034515	0.000989874	10	26	proteasome storage granule	down
GO:0022625	0.001551	14	46	cytosolic large ribosomal subunit	down
GO:0000502	0.00188592	22	89	proteasome complex	down
GO:0043226	0.00260804	605	4402	organelle	down
GO:0043229	0.00260804	605	4402	intracellular organelle	down
GO:0005622	0.00353759	672	4964	intracellular	down
GO:0005788	0.00449431	10	31	endoplasmic reticulum lumen	down
GO:0005623	0.00685668	691	5141	cell	down
GO:0044464	0.00685668	691	5141	cell part	down
GO:0030427	1.70486e-05	28	250	site of polarized growth	up
GO:0043226	3.0412e-05	237	4402	organelle	up
GO:0043229	3.0412e-05	237	4402	intracellular organelle	up
GO:0044424	9.89564e-05	249	4749	intracellular part	up
GO:0044444	0.000130287	193	3437	cytoplasmic part	up
GO:0032153	0.0001304	26	251	cell division site	up
GO:0043227	0.00014916	225	4174	membrane-bounded organelle	up
GO:0043231	0.00014916	225	4174	intracellular membrane-bounded organelle	up
GO:0005623	0.000153638	263	5141	cell	up
GO:0044464	0.000153638	263	5141	cell part	up
GO:0005768	0.000158215	18	145	endosome	up
GO:0005933	0.000184099	22	200	cellular bud	up
GO:0005622	0.000237298	256	4964	intracellular	up
GO:0071944	0.000249292	68	956	cell periphery	up
GO:0005737	0.000264527	208	3805	cytoplasm	up
GO:0005886	0.000351972	53	703	plasma membrane	up
GO:0005935	0.000384454	19	169	cellular bud neck	up
GO:0031090	0.000397099	81	1209	organelle membrane	up
GO:0051286	0.00125913	19	186	cell tip	up
GO:0060187	0.00125913	19	186	cell pole	up
GO:0044448	0.00233439	17	167	cell cortex part	up
GO:0044422	0.0027767	148	2625	organelle part	up
GO:0044446	0.0027767	148	2625	intracellular organelle part	up
GO:0005739	0.00471294	71	1121	mitochondrion	up
GO:0005938	0.00481252	18	194	cell cortex	up
GO:0005774	0.00599199	20	229	vacuolar membrane	up
GO:0034271	0.00656134	2	3	phosphatidylinositol 3-kinase complex I	up
GO:0034272	0.00656134	2	3	phosphatidylinositol 3-kinase complex II	up
GO:0044463	0.0066604	12	112	cell projection part	up
GO:0005816	0.00709129	16	171	spindle pole body	up
GO:0070822	0.00723649	3	9	Sin3-type complex	up
GO:0005795	0.00802971	5	27	Golgi stack	up
GO:0000329	0.00823867	17	189	fungal-type vacuole membrane	up
GO:0000780	0.00840869	6	38	condensed nuclear chromosome, centromeric region	up
GO:0000322	0.00857891	23	285	storage vacuole	up
GO:0000324	0.00857891	23	285	fungal-type vacuole	up
GO:0005937	0.00936245	12	117	mating projection	up
GO:0000775	0.00943083	11	103	chromosome, centromeric region	up
GO:0005934	0.00946538	8	63	cellular bud tip	up
GO:0005815	0.00977337	16	177	microtubule organizing center	up
